# Supplementary material for: Assembly of fluorinated benzodiazepines via Rh(iii)-catalysed [5+2] annulation of N-benzo[d]imidazole indolines with 2,2-difluorovinyl tosylate
Source: Royal Society of Chemistry journal article supplement (doi:10.1039/d3nj01544k), 2023-01-01

## Supporting Information

# Assembly of Fluorinated Benzodiazepines via Rh(III)-Catalysed [5+2] Annulation of *N*-Benzo[*d*]imidazole Indolines with 2,2-Difluorovinyl Tosylate

Fu-Xiaomin Liu,<sup>a,b</sup> Weijie Chen,<sup>b</sup> Lei Ma,<sup>b</sup> Kui Cheng,<sup>a,\*</sup> Zhi Zhou<sup>b,\*</sup> and Wei Yi<sup>b,\*</sup>

<sup>a</sup>Guangdong Provincial Key Laboratory of New Drug Screening and Guangzhou Key Laboratory of Drug Research for Emerging Virus Prevention and Treatment, School of Pharmaceutical Sciences, Southern Medical University, Guangzhou, Guangdong 510515, P. R. China.

<sup>b</sup>Guangzhou Municipal and Guangdong Provincial Key Laboratory of Molecular Target & Clinical Pharmacology, the NMPA and State Key Laboratory of Respiratory Disease, School of Pharmaceutical Sciences and the Fifth Affiliated Hospital, Guangzhou Medical University, Guangzhou, Guangdong 511436, P. R. China.

\*E-mail: Chengk@smu.edu.cn; zhouzhi@gzhmu.edu.cn; yiwei@gzhmu.edu.cn

## Supporting Information

### Contents

|                                                                    |     |
|--------------------------------------------------------------------|-----|
| I. General.....                                                    | S2  |
| II. Experimental Information and Characterization Data.....        | S2  |
| III. Mechanistic Studies.....                                      | S24 |
| IV. X-Ray Crystallographic Data.....                               | S31 |
| V. General Procedure for the Biological Evaluation.....            | S41 |
| VI. References.....                                                | S43 |
| VII. Copies of <sup>1</sup> H and <sup>13</sup> C NMR Spectra..... | S44 |

## I. General

NMR spectra were recorded on JEOL 400 NMR ( $^1\text{H}$  400 MHz;  $^{13}\text{C}$  100 MHz) in  $\text{CDCl}_3$ ,  $\text{DMSO-}d_6$  or  $\text{CD}_3\text{OD}$ . Abbreviations for data quoted are s, singlet; brs, broad singlet; d, doublet; t, triplet; dd, doublet of doublets; m, multiplet. The residual solvent signals were used as references and the chemical shifts converted to the TMS scale ( $\text{CDCl}_3$ :  $\delta_{\text{H}} = 7.26$  ppm,  $\delta_{\text{C}} = 77.16$  ppm;  $\text{DMSO-}d_6$ :  $\delta_{\text{H}} = 2.50$  ppm,  $\delta_{\text{C}} = 39.52$  ppm;  $\text{CD}_3\text{OD}$ :  $\delta_{\text{H}} = 3.31$  ppm,  $\delta_{\text{C}} = 49.00$  ppm). Mass spectra and High-Resolution Mass Spectra (HRMS) were measured on an agilent TOF-G6230B mass spectrometer and Thermo-DFS mass spectrometer. X-ray single-crystal diffraction was conducted on HyPix diffractometer. Thin-layer chromatographies were done on pre-coated silica gel 60 F254 plates (Merck). Silica gel 60H (200-300 mesh) and preparative TLC (200x200 mm, 0.2-0.25 mm in thickness) manufactured by Qingdao Haiyang Chemical Group Co. (China) were used for general chromatography. 2,2-Difluorovinyl tosylate was synthesized according to published procedures.<sup>S1</sup> Other chemicals were purchased from commercial suppliers and were dried and purified if necessary. No attempts were made to optimize yields for substrate synthesis.

## II. Experimental Information and Characterization Data

### General procedure for synthesis of *N*-benzo[*d*]imidazole indolines **1**:

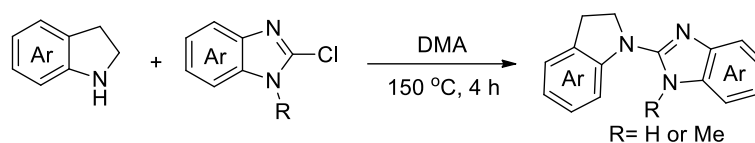

*N*-Benzo[*d*]imidazole indoline substrates were synthesized according to a reported procedure:<sup>S2</sup> The mixture of indoline (1.5 equiv) and 2-chloro-1*H*-benzo[*d*]imidazole (1.0 equiv) in DMA (2 M) were stirred at 150 °C for 4 h, the reaction was monitored by TLC. Afterwards, the mixture was treated with water and extracted with ethyl acetate. The organic layer was dried over  $\text{MgSO}_4$  and concentrated under reduced pressure. The residue was purified by silica gel column chromatography (eluent: PE/EA) to give the corresponding *N*-benzo[*d*]imidazole indolines **1**.

**1a-c, 1e-m** and *N*-Me **1a** are known compounds and all data were in agreement with that reported.<sup>S2</sup>

**2-(4-bromoindolin-1-yl)-1*H*-benzo[*d*]imidazole (1d)**

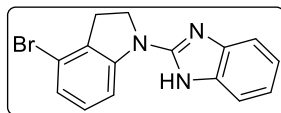

This compound was obtained in 30% yield (0.942 g) as brown solid. Eluent: PE/EA = 2/1,  $R_f = 0.4$ .

**<sup>1</sup>H NMR (400 MHz, DMSO-*d*<sub>6</sub>):**  $\delta$  11.77 (s, 1H), 8.27 (d,  $J = 7.9$  Hz, 1H), 7.43-7.28 (m, 2H), 7.18 (t,  $J = 8.0$  Hz, 1H), 7.09-6.99 (m, 3H), 4.20 (t,  $J = 8.7$  Hz, 2H), 3.25 (t,  $J = 8.7$  Hz, 2H).

**<sup>13</sup>C NMR (100 MHz, DMSO-*d*<sub>6</sub>):**  $\delta$  150.2, 145.2, 131.0, 129.5, 123.2, 118.6, 112.1, 48.2, 29.0.

**HRMS (ESI)** calculated for C<sub>15</sub>H<sub>13</sub>BrN<sub>3</sub> ( $[M+H]^+$ ): 314.0287; found: 314.0284.

**6-fluoro-2-(indolin-1-yl)-1*H*-benzo[*d*]imidazole (1n)**

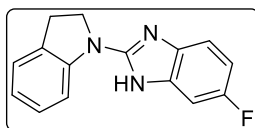

This compound was obtained in 15% yield (0.380 g) as white solid. Eluent: PE/EA = 1/1,  $R_f = 0.7$ .

**<sup>1</sup>H NMR (400 MHz, DMSO-*d*<sub>6</sub>):**  $\delta$  7.90 (d,  $J = 7.6$  Hz, 1H), 7.56-7.48 (m, 1H), 7.39-7.28 (m, 3H), 7.16-7.06 (m, 2H), 4.30 (t,  $J = 8.2$  Hz, 2H), 3.33 (t,  $J = 7.6$  Hz, 2H).

**<sup>13</sup>C NMR (100 MHz, DMSO-*d*<sub>6</sub>):**  $\delta$  157.8 (d,  $J = 238.4$  Hz), 146.3, 140.1, 132.5, 127.5, 125.7, 124.0, 113.03 (d,  $J = 11.1$  Hz), 112.8, 110.6 (d,  $J = 24.2$  Hz), 99.6 (d,  $J = 28.3$  Hz), 51.2, 27.5.

**<sup>19</sup>F NMR (376 MHz, DMSO-*d*<sub>6</sub>):**  $\delta$  -118.70.

**HRMS (ESI)** calculated for C<sub>15</sub>H<sub>13</sub>FN<sub>3</sub> ( $[M+H]^+$ ): 254.1088; found: 254.1088.

### Optimization studies:

The mixture of *N*-benzo[*d*]imidazole indoline **1a** (0.1 mmol, 1.0 equiv), 2,2-difluorovinyl tosylate **2a** (0.1 mmol, 1.0 equiv), catalyst (5 mol %) and base (0.1 mmol, 1.0 equiv) in the solvent (1.0 mL) was stirred at 80 °C for 24 h in an oil bath. Afterwards, the solvent was removed under reduced pressure and the mixture was purified by preparative TLC (eluent: PE/EA = 5/1) to give the corresponding monofluorinated benzodiazepine **3a** and *gem*-difluorinated benzodiazepine **4a**.

Table S1 Conditions screening for the synthesis of fluorinated benzodiazepines<sup>a</sup>

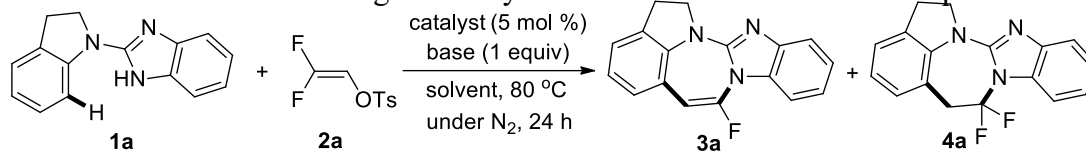

| entry            | catalyst                                     | base  | solvent | yield (%) |           |
|------------------|----------------------------------------------|-------|---------|-----------|-----------|
|                  |                                              |       |         | <b>3a</b> | <b>4a</b> |
| 1 <sup>b,c</sup> | [Cp* <i>RhCl</i> <sub>2</sub> ] <sub>2</sub> | CsOAc | MeOH    | 14        | 14        |
| 2 <sup>b,c</sup> | [Cp* <i>RhCl</i> <sub>2</sub> ] <sub>2</sub> | CsOAc | DCE     | 12        | -         |
| 3 <sup>b</sup>   | [Cp* <i>IrCl</i> <sub>2</sub> ] <sub>2</sub> | CsOAc | MeOH    | n.d.      |           |
| 4 <sup>b,d</sup> | [Cp* <i>Co</i> (CO)I <sub>2</sub> ]          | CsOAc | MeOH    | n.d.      | n.d.      |
| 5 <sup>b</sup>   | [Cy <i>RuCl</i> <sub>2</sub> ] <sub>2</sub>  | CsOAc | MeOH    | n.d.      | n.d.      |
| 6 <sup>b</sup>   | [Cy <i>OsCl</i> <sub>2</sub> ] <sub>2</sub>  | CsOAc | MeOH    | n.d.      | n.d.      |
| 7                | [Cp* <i>RhCl</i> <sub>2</sub> ] <sub>2</sub> | CsOAc | MeOH    | 36        | 32        |
| 8                | [Cp* <i>RhCl</i> <sub>2</sub> ] <sub>2</sub> | CsOAc | DCE     | 42        | 12        |
| 9                | [Cp* <i>RhCl</i> <sub>2</sub> ] <sub>2</sub> | CsOAc | MeCN    | 62        | n.d.      |
| 10               | [Cp* <i>RhCl</i> <sub>2</sub> ] <sub>2</sub> | CsOAc | dioxane | 24        | <5        |
| 11               | [Cp* <i>RhCl</i> <sub>2</sub> ] <sub>2</sub> | CsOAc | DMF     | 19        | n.d.      |
| 12               | [Cp* <i>RhCl</i> <sub>2</sub> ] <sub>2</sub> | CsOAc | THF     | 67        | 7         |
| 13               | [Cp* <i>RhCl</i> <sub>2</sub> ] <sub>2</sub> | CsOAc | EtOH    | 25        | 22        |

|                 |                                                     |                                 |                   |      |      |
|-----------------|-----------------------------------------------------|---------------------------------|-------------------|------|------|
| 14              | [Cp*RhCl <sub>2</sub> ] <sub>2</sub>                | CsOAc                           | DMSO              | <5   | n.d. |
| 15              | [Cp*RhCl <sub>2</sub> ] <sub>2</sub>                | CsOAc                           | acetone           | 47   | n.d. |
| 16              | [Cp*RhCl <sub>2</sub> ] <sub>2</sub>                | CsOAc                           | DCM               | 48   | 12   |
| 17              | [Cp*RhCl <sub>2</sub> ] <sub>2</sub>                | CsOAc                           | TFE               | <5   | n.d. |
| 18              | [Cp*RhCl <sub>2</sub> ] <sub>2</sub>                | CsOAc                           | HFIP              | <5   | n.d. |
| 19              | [Cp*RhCl <sub>2</sub> ] <sub>2</sub>                | CsOAc                           | toluence          | 22   | n.d. |
| 20              | [Cp*RhCl <sub>2</sub> ] <sub>2</sub>                | CsOAc                           | <sup>t</sup> PrOH | <5   | n.d. |
| 21              | [Cp*RhCl <sub>2</sub> ] <sub>2</sub>                | CsOAc                           | <sup>t</sup> AmOH | 40   | <5   |
| 22              | [Cp*RhCl <sub>2</sub> ] <sub>2</sub>                | CsOAc                           | <sup>t</sup> BuOH | 50   | <5   |
| 23              | [Cp*RhCl <sub>2</sub> ] <sub>2</sub>                | CsOAc                           | EG                | 8    | 20   |
| 24              | [Cp*RhCl <sub>2</sub> ] <sub>2</sub>                | CsOAc                           | HMPA              | n.d. | n.d. |
| 25              | [Cp*RhCl <sub>2</sub> ] <sub>2</sub>                | KOPiv                           | MeCN              | 41   | n.d. |
| 26              | [Cp*RhCl <sub>2</sub> ] <sub>2</sub>                | NaOAc                           | MeCN              | 34   | n.d. |
| 27              | [Cp*RhCl <sub>2</sub> ] <sub>2</sub>                | KOAc                            | MeCN              | 11   | <5   |
| 28              | [Cp*RhCl <sub>2</sub> ] <sub>2</sub>                | Zn(OAc) <sub>2</sub>            | MeCN              | 23   | n.d. |
| 29              | [Cp*RhCl <sub>2</sub> ] <sub>2</sub>                | Na <sub>2</sub> CO <sub>3</sub> | MeCN              | 69   | <5   |
| 30              | [Cp*RhCl <sub>2</sub> ] <sub>2</sub>                | K <sub>2</sub> CO <sub>3</sub>  | MeCN              | 89   | n.d. |
| 31              | [Cp*RhCl <sub>2</sub> ] <sub>2</sub>                | K <sub>3</sub> PO <sub>4</sub>  | MeCN              | 67   | n.d. |
| 32              | [Cp*RhCl <sub>2</sub> ] <sub>2</sub>                | Cs <sub>2</sub> CO <sub>3</sub> | MeCN              | 78   | n.d. |
| 33 <sup>e</sup> | [Cp*RhCl <sub>2</sub> ] <sub>2</sub>                | K <sub>2</sub> CO <sub>3</sub>  | MeCN              | 71   | n.d. |
| 34 <sup>f</sup> | [Cp*RhCl <sub>2</sub> ] <sub>2</sub>                | K <sub>2</sub> CO <sub>3</sub>  | MeCN              | 79   | n.d. |
| 35              | [Cp <sup>E</sup> RhCl <sub>2</sub> ] <sub>2</sub>   | CsOAc                           | MeOH              | n.d. | n.d. |
| 36              | [Cp* <sup>Bn</sup> RhCl <sub>2</sub> ] <sub>2</sub> | CsOAc                           | MeOH              | 30   | 31   |
| 37              | [Cp* <sup>Cy</sup> RhCl <sub>2</sub> ] <sub>2</sub> | CsOAc                           | MeOH              | 22   | 26   |
| 38              | [Cp <sup>2Ph</sup> RhCl <sub>2</sub> ] <sub>2</sub> | CsOAc                           | MeOH              | 22   | 24   |
| 39              | [Cp*RhCl <sub>2</sub> ] <sub>2</sub>                | KOPiv                           | MeOH              | 19   | 20   |

|                 |                                      |                                 |      |    |    |
|-----------------|--------------------------------------|---------------------------------|------|----|----|
| 40              | [Cp*RhCl <sub>2</sub> ] <sub>2</sub> | Zn(OAc) <sub>2</sub>            | MeOH | 24 | 31 |
| 41              | [Cp*RhCl <sub>2</sub> ] <sub>2</sub> | K <sub>3</sub> PO <sub>4</sub>  | MeOH | 9  | 29 |
| 42              | [Cp*RhCl <sub>2</sub> ] <sub>2</sub> | NaHCO <sub>3</sub>              | MeOH | 23 | 23 |
| 43              | [Cp*RhCl <sub>2</sub> ] <sub>2</sub> | K <sub>2</sub> HPO <sub>4</sub> | MeOH | 18 | 20 |
| 44              | [Cp*RhCl <sub>2</sub> ] <sub>2</sub> | NaOAc                           | MeOH | 34 | 35 |
| 45              | [Cp*RhCl <sub>2</sub> ] <sub>2</sub> | LiOAc                           | MeOH | 15 | 16 |
| 46              | [Cp*RhCl <sub>2</sub> ] <sub>2</sub> | KOAc                            | MeOH | 21 | 23 |
| 47              | [Cp*RhCl <sub>2</sub> ] <sub>2</sub> | Na <sub>2</sub> CO <sub>3</sub> | MeOH | 35 | 35 |
| 48              | [Cp*RhCl <sub>2</sub> ] <sub>2</sub> | K <sub>2</sub> CO <sub>3</sub>  | MeOH | 29 | 50 |
| 49 <sup>e</sup> | [Cp*RhCl <sub>2</sub> ] <sub>2</sub> | K <sub>2</sub> CO <sub>3</sub>  | MeOH | 39 | 30 |
| 50 <sup>f</sup> | [Cp*RhCl <sub>2</sub> ] <sub>2</sub> | K <sub>2</sub> CO <sub>3</sub>  | MeOH | 30 | 41 |
| 51 <sup>g</sup> | [Cp*RhCl <sub>2</sub> ] <sub>2</sub> | K <sub>2</sub> CO <sub>3</sub>  | MeOH | 31 | 34 |

<sup>a</sup>Reaction conditions: **1a** (0.1 mmol), **2a** (0.1 mmol), catalyst (5 mol %) and base (1 equiv) in solvent (0.1 M) for 24 h under an atmosphere of N<sub>2</sub>, <sup>1</sup>H-NMR yields were reported using 1,3,5-trimethoxybenzene as the internal standard. <sup>b</sup>The reaction was conducted without exclusion of air or moisture. <sup>c</sup>Isolated yields were reported. <sup>d</sup>10 mol % of Cp\*Co(CO)I<sub>2</sub> was used. <sup>e</sup>2,2-Difluorovinyl 4-(trifluoromethyl)benzenesulfonate was used as the coupling partner. <sup>f</sup>2,2-Difluorovinyl 2,4,6-trimethylbenzenesulfonate was used as the coupling partner. <sup>g</sup>The reaction was conducted at 50 °C. n.d.: not detected; EG: ethylene glycol.

### General procedure for the synthesis of monofluorinated benzodiazepine **3**:

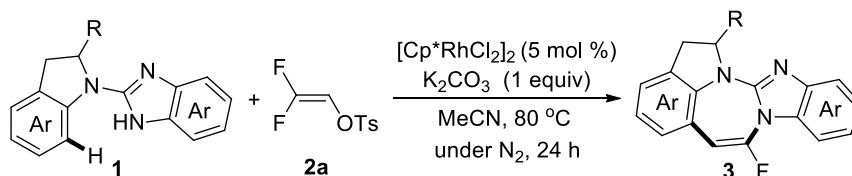

The mixture of *N*-benzo[*d*]imidazole indoline **1** (0.2 mmol, 1.0 equiv), 2,2-difluorovinyl tosylate **2a** (0.2 mmol, 1.0 equiv), [Cp\*RhCl<sub>2</sub>]<sub>2</sub> (5 mol %) and K<sub>2</sub>CO<sub>3</sub> (0.2 mmol, 1.0 equiv) in MeCN (2.0 mL) was stirred at 80 °C in an oil bath under an atmosphere of N<sub>2</sub> for 24 h. Afterwards, the solvent was removed under

reduced pressure and the mixture was purified by preparative TLC (eluent: PE/EA = 5/1) to give the corresponding monofluorinated benzodiazepine product **3**.

### Characterization of products **3**:

#### 7-fluoro-1,2-dihydrobenzo[4',5']imidazo[2',1':2,3][1,3]diazepino[6,7,1-*hi*]indole (**3a**)

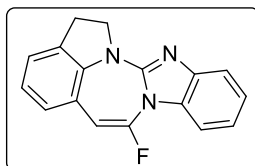

This compound was obtained in 87% yield (48.2 mg) as yellow solid, m.p.: 149-150 °C. Eluent: PE/EA = 5/1,  $R_f = 0.6$ .

**$^1\text{H}$  NMR (400 MHz,  $\text{CDCl}_3$ ):**  $\delta$  7.36 (d,  $J = 7.7$  Hz, 1H), 7.27-7.22 (m, 1H), 7.09 (t,  $J = 7.6$  Hz, 1H), 7.01 (t,  $J = 7.7$  Hz, 1H), 6.91 (d,  $J = 7.4$  Hz, 1H), 6.76 (t,  $J = 7.5$  Hz, 1H), 6.61 (d,  $J = 7.5$  Hz, 1H), 5.46 (d,  $J = 13.9$  Hz, 1H), 4.23 (t,  $J = 8.8$  Hz, 2H), 3.03 (t,  $J = 8.8$  Hz, 2H).

**$^{13}\text{C}\{^1\text{H}\}$  NMR (100 MHz,  $\text{CDCl}_3$ ):**  $\delta$  154.3, 147.5 (d,  $J = 256.4$  Hz), 143.6, 142.5, 132.4 (d,  $J = 1.7$  Hz), 131.9, 127.7 (d,  $J = 4.5$  Hz), 125.0, 123.9, 123.5, 122.4 (d,  $J = 1.3$  Hz), 117.9 (d,  $J = 9.1$  Hz), 117.6, 112.6 (d,  $J = 14.4$  Hz), 93.2 (d,  $J = 31.9$  Hz), 49.9, 27.4.

**$^{19}\text{F}$  NMR (376 MHz,  $\text{CDCl}_3$ ):**  $\delta$  -101.12 (d,  $J = 16.2$  Hz).

**HRMS (ESI)** calculated for  $\text{C}_{17}\text{H}_{13}\text{FN}_3$  ( $[\text{M}+\text{H}]^+$ ): 278.1088; found: 278.1086.

**Scale-up synthesis of **3a**:** To a round bottom flask was added *N*-benzo[*d*]imidazole indoline **1a** (1.0 mmol, 1.0 equiv), 2,2-difluorovinyl tosylate **2a** (1.0 mmol, 1.0 equiv),  $[\text{Cp}^*\text{RhCl}_2]_2$  (5 mol %) and  $\text{K}_2\text{CO}_3$  (1.0 mmol, 1.0 equiv) in MeCN (10.0 mL), the mixture was stirred at 80 °C in an oil bath under an atmosphere of  $\text{N}_2$  for 24 h. Afterwards, the solvent was removed under reduced pressure and the mixture was purified by silica gel column chromatography (eluent: PE/EA = 10/1) to give the corresponding monofluorinated benzodiazepine product **3a** in 90% yield (0.249 g).

**3,7-difluoro-1,2-dihydrobenzo[4',5']imidazo[2',1':2,3][1,3]diazepino[6,7,1-*hi*]indole (3b)**

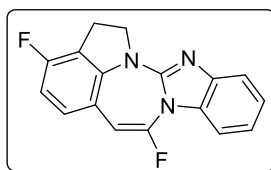

This compound was obtained in 76% yield (44.8 mg) as yellow solid, m.p.: 173-175 °C. Eluent: PE/EA = 5/1,  $R_f$  = 0.6.

$^1\text{H NMR}$  (400 MHz,  $\text{CDCl}_3$ ):  $\delta$  7.38 (d,  $J$  = 7.8 Hz, 1H), 7.29-7.24 (m, 1H), 7.11 (t,  $J$  = 7.5 Hz, 1H), 7.04 (t,  $J$  = 7.7 Hz, 1H), 6.66-6.56 (m, 1H), 6.49 (t,  $J$  = 8.2 Hz, 1H), 5.46 (d,  $J$  = 13.7 Hz, 1H), 4.31 (t,  $J$  = 8.9 Hz, 2H), 3.07 (t,  $J$  = 8.8 Hz, 2H).

$^{13}\text{C}\{^1\text{H}\}$  NMR (100 MHz,  $\text{CDCl}_3$ ):  $\delta$  159.5 (dd,  $J$  = 247.5, 1.5 Hz), 153.4, 147.1 (dd,  $J$  = 256.7 Hz), 146.0 (d,  $J$  = 8.6 Hz), 142.2, 132.36 (d,  $J$  = 2.2 Hz), 129.34 (dd,  $J$  = 8.3, 4.8 Hz), 123.6, 122.7 (d,  $J$  = 1.3 Hz), 118.5 (d,  $J$  = 23.5 Hz), 117.9, 113.8 (dd,  $J$  = 9.2, 3.4 Hz), 112.7 (d,  $J$  = 14.4 Hz), 110.6 (d,  $J$  = 21.1 Hz), 92.6 (d,  $J$  = 32.6 Hz), 50.5, 23.8.

$^{19}\text{F NMR}$  (376 MHz,  $\text{CDCl}_3$ ):  $\delta$  -102.32 (d,  $J$  = 18.5 Hz), -118.31.

HRMS (ESI) calculated for  $\text{C}_{17}\text{H}_{12}\text{F}_2\text{N}_3$  ( $[\text{M}+\text{H}]^+$ ): 296.0994; found: 296.0988.

**3-chloro-7-fluoro-1,2-dihydrobenzo[4',5']imidazo[2',1':2,3][1,3]diazepino[6,7,1-*hi*]indole (3c)**

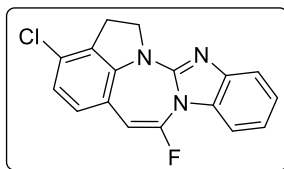

This compound was obtained in 85% yield (52.8 mg) as yellow solid, m.p.: 191-193 °C. Eluent: PE/EA = 5/1,  $R_f$  = 0.7.



**<sup>1</sup>H NMR (400 MHz, CDCl<sub>3</sub>):** δ 7.38 (d, *J* = 7.8 Hz, 1H), 7.30-7.26 (m, 1H), 7.12 (t, *J* = 7.6 Hz, 1H), 7.05 (t, *J* = 7.7 Hz, 1H), 6.77 (d, *J* = 8.1 Hz, 1H), 6.58 (d, *J* = 8.1 Hz, 1H), 5.46 (d, *J* = 13.8 Hz, 1H), 4.30 (t, *J* = 8.8 Hz, 2H), 3.09 (t, *J* = 8.9 Hz, 2H).

**<sup>13</sup>C{<sup>1</sup>H} NMR (100 MHz, CDCl<sub>3</sub>):** δ 153.4, 147.5 (d, *J* = 256.2 Hz), 144.6, 142.3, 132.3, 130.8 (d, *J* = 1.4 Hz), 130.4, 128.9 (d, *J* = 4.6 Hz), 123.7 (d, *J* = 4.5 Hz), 122.7, 117.9, 116.2 (d, *J* = 9.3 Hz), 112.7 (d, *J* = 14.6 Hz), 92.5 (d, *J* = 32.8 Hz), 49.8, 27.0.

**<sup>19</sup>F NMR (376 MHz, CDCl<sub>3</sub>):** δ -101.08 (d, *J* = 18.6 Hz).

**HRMS (ESI)** calculated for C<sub>17</sub>H<sub>12</sub>ClFN<sub>3</sub> ([M+H]<sup>+</sup>): 312.0698; found: 312.0692.

**3-bromo-7-fluoro-1,2-dihydrobenzo[4',5']imidazo[2',1':2,3][1,3]diazepino[6,7,1-*h*]  
i]indole (3d)**

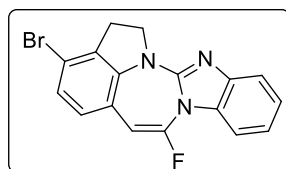

This compound was obtained in 63% yield (44.7 mg) as yellow solid, m.p.: 174-175 °C. Eluent: PE/EA = 5/1, R<sub>f</sub> = 0.7.

**<sup>1</sup>H NMR (400 MHz, CDCl<sub>3</sub>):** δ 7.41 – 7.36 (m, 1H), 7.29-7.25 (m, 1H), 7.12 (td, *J* = 7.6, 1.2 Hz, 1H), 7.08-7.03 (m, 1H), 6.93 (d, *J* = 8.2 Hz, 1H), 6.52 (d, *J* = 8.1 Hz, 1H), 5.45 (d, *J* = 13.8 Hz, 1H), 4.34-4.26 (m, 2H), 3.07 (t, *J* = 8.9 Hz, 2H).

**<sup>13</sup>C{<sup>1</sup>H} NMR (100 MHz, CDCl<sub>3</sub>):** δ 153.6, 147.6 (d, *J* = 256.8 Hz), 144.4, 142.3, 132.5, 132.4 (d, *J* = 2.2 Hz), 129.1 (d, *J* = 4.7 Hz), 126.6, 123.7, 122.8 (d, *J* = 1.4 Hz), 119.7 (d, *J* = 1.7 Hz), 117.9, 116.9 (d, *J* = 9.4 Hz), 112.7 (d, *J* = 14.5 Hz), 92.58 (d, *J* = 32.8 Hz), 49.4, 29.0.

**<sup>19</sup>F NMR (376 MHz, CDCl<sub>3</sub>):** δ -100.76 (d, *J* = 16.2 Hz).

**HRMS (ESI)** calculated for C<sub>17</sub>H<sub>12</sub>BrFN<sub>3</sub> ([M+H]<sup>+</sup>): 356.0193; found: 356.0186.

**7-fluoro-3-methoxy-1,2-dihydrobenzo[4',5']imidazo[2',1':2,3][1,3]diazepino[6,7,1**

**-hi]indole (3e)**

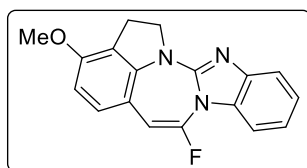

This compound was obtained in 78% yield (47.8 mg) as yellow solid, m.p.: 212-214 °C. Eluent: PE/EA = 5/1,  $R_f$  = 0.3.

**$^1\text{H}$  NMR (400 MHz,  $\text{CDCl}_3$ ):**  $\delta$  7.41-7.37 (m, 1H), 7.31-7.27 (m, 1H), 7.11 (td,  $J$  = 7.6, 1.1 Hz, 1H), 7.04 (td,  $J$  = 7.8, 1.3 Hz, 1H), 6.66 (d,  $J$  = 8.3 Hz, 1H), 6.35 (d,  $J$  = 8.4 Hz, 1H), 5.52 (d,  $J$  = 13.8 Hz, 1H), 4.35-4.27 (m, 2H), 3.80 (s, 3H), 3.00 (t,  $J$  = 8.8 Hz, 2H).

**$^{13}\text{C}\{^1\text{H}\}$  NMR (100 MHz,  $\text{CDCl}_3$ ):**  $\delta$  156.6, 153.7, 146.4 (d,  $J$  = 252.4 Hz), 144.9, 142.3, 132.4 (d,  $J$  = 1.9 Hz), 129.1 (d,  $J$  = 4.8 Hz), 123.4, 122.3 (d,  $J$  = 1.4 Hz), 119.5, 117.6, 112.6 (d,  $J$  = 14.5 Hz), 110.6 (d,  $J$  = 9.0 Hz), 105.7, 93.0 (d,  $J$  = 32.0 Hz), 55.5, 50.5, 24.6.

**$^{19}\text{F}$  NMR (376 MHz,  $\text{CDCl}_3$ ):**  $\delta$  -104.34 (d,  $J$  = 19.0 Hz).

**HRMS (ESI)** calculated for  $\text{C}_{18}\text{H}_{15}\text{FN}_3\text{O}$  ( $[\text{M}+\text{H}]^+$ ): 308.1194; found: 308.1187.

**3-(benzyloxy)-7-fluoro-1,2-dihydrobenzo[4',5']imidazo[2',1':2,3][1,3]diazepino[6,7,1-hi]indole (3f)**

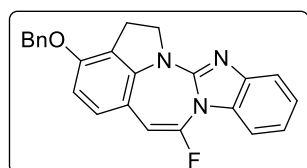

This compound was obtained in 88% yield (67.3 mg) as orange solid, m.p.: 167-169 °C. Eluent: PE/EA = 5/1,  $R_f$  = 0.6.

**$^1\text{H}$  NMR (400 MHz,  $\text{CDCl}_3$ ):**  $\delta$  7.41-7.36 (m, 5H), 7.36-7.31 (m, 1H), 7.30-7.26 (m, 1H), 7.10 (t,  $J$  = 7.6 Hz, 1H), 7.02 (t,  $J$  = 7.6 Hz, 1H), 6.59 (d,  $J$  = 8.2 Hz, 1H), 6.36

(d,  $J = 8.3$  Hz, 1H), 5.46 (d,  $J = 14.0$  Hz, 1H), 5.04 (s, 2H), 4.29 (t,  $J = 8.8$  Hz, 2H), 3.04 (t,  $J = 8.7$  Hz, 2H).

$^{13}\text{C}\{^1\text{H}\}$  NMR (101 MHz,  $\text{CDCl}_3$ ):  $\delta$  155.6, 153.6, 146.5 (d,  $J = 254.2$  Hz), 144.9, 142.3, 136.8, 132.4 (d,  $J = 1.1$  Hz), 129.1 (d,  $J = 4.8$  Hz), 128.7, 128.1, 127.2, 123.4, 122.3, 120.0, 117.6, 112.6 (d,  $J = 14.8$  Hz), 110.8 (d,  $J = 8.9$  Hz), 107.0, 92.9 (d,  $J = 32.0$  Hz), 70.0, 50.5, 24.7.

$^{19}\text{F}$  NMR (376 MHz,  $\text{CDCl}_3$ ):  $\delta$  -104.30 (d,  $J = 17.6$  Hz).

HRMS (ESI) calculated for  $\text{C}_{24}\text{H}_{19}\text{FN}_3\text{O}$  ( $[\text{M}+\text{H}]^+$ ): 384.1507; found: 384.1502.

**methyl**

**7-fluoro-1,2-dihydrobenzo[4',5']imidazo[2',1':2,3][1,3]diazepino[6,7,1-*hi*]indole-3-carboxylate (3g)**

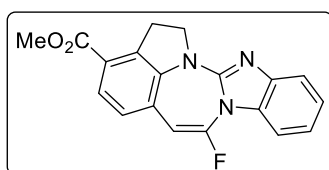

This compound was obtained in 71% yield (47.3 mg) as yellow solid, m.p.: 205-207 °C. Eluent: PE/EA = 4/1,  $R_f = 0.3$ .

$^1\text{H}$  NMR (400 MHz,  $\text{CDCl}_3$ ):  $\delta$  7.45 (d,  $J = 8.0$  Hz, 1H), 7.38 (d,  $J = 8.0$  Hz, 1H), 7.29-7.24 (m, 1H), 7.12 (t,  $J = 7.5$  Hz, 1H), 7.08-7.02 (m, 1H), 6.69 (d,  $J = 8.0$  Hz, 1H), 5.48 (d,  $J = 14.0$  Hz, 1H), 4.29 (t,  $J = 8.9$  Hz, 2H), 3.88 (s, 3H), 3.42 (t,  $J = 8.9$  Hz, 2H).

$^{13}\text{C}\{^1\text{H}\}$  NMR (100 MHz,  $\text{CDCl}_3$ ):  $\delta$  166.3, 153.5, 148.6 (d,  $J = 256.9$  Hz), 144.4, 142.5, 134.7, 132.3 (d,  $J = 1.4$  Hz), 127.7 (d,  $J = 4.5$  Hz), 126.3, 125.5, 123.8, 122.7, 122.2 (d,  $J = 9.8$  Hz), 117.9, 112.7 (d,  $J = 14.6$  Hz), 92.5 (d,  $J = 32.8$  Hz), 52.1, 50.3, 28.6.

$^{19}\text{F}$  NMR (376 MHz,  $\text{CDCl}_3$ ):  $\delta$  -98.53 (d,  $J = 18.9$  Hz).

HRMS (ESI) calculated for  $\text{C}_{19}\text{H}_{15}\text{FN}_3\text{O}_2$  ( $[\text{M}+\text{H}]^+$ ): 336.1143; found: 336.1138.

**7-fluoro-4-methyl-1,2-dihydrobenzo[4',5']imidazo[2',1':2,3][1,3]diazepino[6,7,1-*h*]indole (3h)**

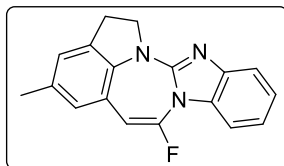

This compound was obtained in 85% yield (49.7 mg) as yellow solid, m.p.: 147-149 °C. Eluent: PE/EA = 5/1,  $R_f = 0.6$ .

$^1\text{H NMR}$  (400 MHz,  $\text{CDCl}_3$ ):  $\delta$  7.35 (d,  $J = 7.7$  Hz, 1H), 7.26-7.22 (m, 1H), 7.08 (t,  $J = 7.6$  Hz, 1H), 7.01 (t,  $J = 7.7$  Hz, 1H), 6.73 (s, 1H), 6.43 (s, 1H), 5.44 (d,  $J = 13.9$  Hz, 1H), 4.22 (t,  $J = 8.8$  Hz, 2H), 2.99 (t,  $J = 8.8$  Hz, 2H), 2.17 (s, 3H).

$^{13}\text{C}\{^1\text{H}\}$  NMR (100 MHz,  $\text{CDCl}_3$ ):  $\delta$  154.7, 147.6 (d,  $J = 256.4$  Hz), 142.5, 141.2, 133.6, 132.4 (d,  $J = 1.7$  Hz), 132.1, 128.1 (d,  $J = 4.7$  Hz), 125.6 (d,  $J = 1.3$  Hz), 123.5, 122.2 (d,  $J = 1.4$  Hz), 117.6, 117.5, 112.6 (d,  $J = 14.3$  Hz), 93.3 (d,  $J = 31.9$  Hz), 50.1, 27.5, 20.6.

$^{19}\text{F NMR}$  (376 MHz,  $\text{CDCl}_3$ ):  $\delta$  -101.13 (d,  $J = 16.4$  Hz).

HRMS (ESI) calculated for  $\text{C}_{18}\text{H}_{15}\text{FN}_3$  ( $[\text{M}+\text{H}]^+$ ): 292.1245; found: 292.1238.

**7-fluoro-4-methoxy-1,2-dihydrobenzo[4',5']imidazo[2',1':2,3][1,3]diazepino[6,7,1-*h*]indole (3i)**

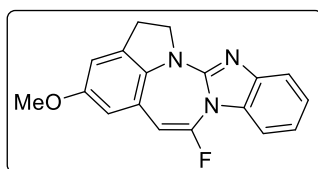

This compound was obtained in 69% yield (42.3 mg) as yellow solid, m.p.: 155-156 °C. Eluent: PE/EA = 5/1,  $R_f = 0.3$ .

**<sup>1</sup>H NMR (400 MHz, CDCl<sub>3</sub>):** δ 7.36 (d, *J* = 7.7 Hz, 1H), 7.31-7.21 (m, 1H), 7.10 (t, *J* = 7.5 Hz, 1H), 7.02 (t, *J* = 7.7 Hz, 1H), 6.52 (s, 1H), 6.22 (s, 1H), 5.49 (dd, *J* = 13.5, 2.6 Hz, 1H), 4.26 (t, *J* = 8.7 Hz, 2H), 3.72 (s, 3H), 3.04 (t, *J* = 8.5 Hz, 2H).

**<sup>13</sup>C{<sup>1</sup>H} NMR (101 MHz, CDCl<sub>3</sub>):** δ 156.9, 155.2, 147.9 (d, *J* = 257.2 Hz), 142.6, 137.1, 133.4, 132.3 (d, *J* = 1.5 Hz), 123.5, 122.2, 118.6 (d, *J* = 9.4 Hz), 117.5, 112.7 (d, *J* = 4.6 Hz), 112.5 (d, *J* = 14.1 Hz), 110.4, 93.2 (d, *J* = 32.5 Hz), 55.8, 50.1, 27.9.

**<sup>19</sup>F NMR (376 MHz, CDCl<sub>3</sub>):** δ -99.89 (d, *J* = 17.5 Hz).

**HRMS (ESI)** calculated for C<sub>18</sub>H<sub>15</sub>FN<sub>3</sub>O ([M+H]<sup>+</sup>): 308.1194; found: 308.1187.

**4-bromo-7-fluoro-1,2-dihydrobenzo[4',5']imidazo[2',1':2,3][1,3]diazepino[6,7,1-*h*]indole (3j)**

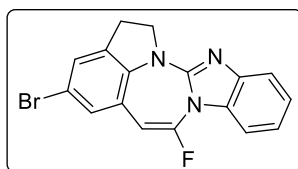

This compound was obtained in 55% yield (39.1 mg) as yellow solid, m.p.: 157-159 °C. Eluent: PE/EA = 5/1, R<sub>f</sub> = 0.6.

**<sup>1</sup>H NMR (400 MHz, CDCl<sub>3</sub>):** δ 7.37 (d, *J* = 7.5 Hz, 1H), 7.29-7.25 (m, 1H), 7.14-7.09 (m, 1H), 7.08-7.03 (m, 2H), 6.78 (d, *J* = 1.4 Hz, 1H), 5.43 (d, *J* = 13.7 Hz, 1H), 4.31-4.23 (m, 2H), 3.06 (t, *J* = 8.9 Hz, 2H).

**<sup>13</sup>C{<sup>1</sup>H} NMR (101 MHz, CDCl<sub>3</sub>):** δ 153.7, 148.1 (d, *J* = 256.4 Hz), 142.7, 142.3, 134.0, 132.3 (d, *J* = 1.6 Hz), 130.0 (d, *J* = 4.7 Hz), 127.6, 123.7, 122.7, 119.6 (d, *J* = 9.7 Hz), 117.8, 116.0, 112.7 (d, *J* = 14.5 Hz), 92.1 (d, *J* = 33.1 Hz), 50.2, 27.3.

**<sup>19</sup>F NMR (376 MHz, CDCl<sub>3</sub>):** δ -99.37 (d, *J* = 18.8 Hz).

**HRMS (ESI)** calculated for C<sub>17</sub>H<sub>12</sub>BrFN<sub>3</sub> ([M+H]<sup>+</sup>): 356.0193; found: 356.0186.

**7-fluoro-5-methyl-1,2-dihydrobenzo[4',5']imidazo[2',1':2,3][1,3]diazepino[6,7,1-*h*]indole (3k)**

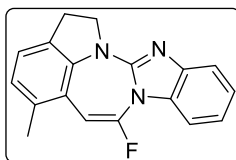

This compound was obtained in 53% yield (30.8 mg) as yellow solid, m.p.: 103-105 °C. Eluent: PE/EA = 5/1,  $R_f$  = 0.6.

$^1\text{H NMR}$  (400 MHz,  $\text{CDCl}_3$ ):  $\delta$  7.41 (d,  $J$  = 7.7 Hz, 1H), 7.31-7.27 (m, 1H), 7.13 (t,  $J$  = 7.6 Hz, 1H), 7.06 (t,  $J$  = 7.6 Hz, 1H), 6.91 (d,  $J$  = 7.5 Hz, 1H), 6.73 (d,  $J$  = 7.5 Hz, 1H), 5.77 (d,  $J$  = 12.8 Hz, 1H), 4.34 (t,  $J$  = 8.7 Hz, 2H), 3.05 (t,  $J$  = 8.6 Hz, 2H), 2.23 (s, 3H).

$^{13}\text{C}\{^1\text{H}\}$  NMR (100 MHz,  $\text{CDCl}_3$ ):  $\delta$  156.8, 147.1 (d,  $J$  = 257.2 Hz), 145.5, 142.6, 135.1 (d,  $J$  = 4.4 Hz), 132.2 (d,  $J$  = 1.8 Hz), 130.3, 125.8, 124.7, 123.5, 122.3, 117.7, 117.5 (d,  $J$  = 7.8 Hz), 112.3 (d,  $J$  = 11.5 Hz), 92.3 (d,  $J$  = 31.8 Hz), 50.0, 27.5, 19.6.

$^{19}\text{F NMR}$  (376 MHz,  $\text{CDCl}_3$ ):  $\delta$  -98.23 (d,  $J$  = 16.2 Hz).

HRMS (ESI) calculated for  $\text{C}_{18}\text{H}_{15}\text{FN}_3$  ( $[\text{M}+\text{H}]^+$ ): 292.1245; found: 292.1240.

### 5,7-difluoro-1,2-dihydrobenzo[4',5']imidazo[2',1':2,3][1,3]diazepino[6,7,1-*hi*]indole (31)

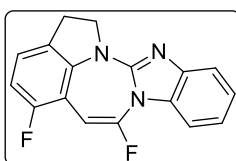

This compound was obtained in 49% yield (28.8 mg) as yellow solid, m.p.: 146-148 °C. Eluent: PE/EA = 5/1,  $R_f$  = 0.7.

$^1\text{H NMR}$  (400 MHz,  $\text{CDCl}_3$ ):  $\delta$  7.39 (d,  $J$  = 7.7 Hz, 1H), 7.31-7.27 (m, 1H), 7.16-7.03 (m, 2H), 6.89-6.85 (m, 1H), 6.55-6.51 (m, 1H), 5.72 (d,  $J$  = 13.5 Hz, 1H), 4.36-4.28 (m, 2H), 3.03 (t,  $J$  = 8.8 Hz, 2H).

$^{13}\text{C}\{^1\text{H}\}$  NMR (100 MHz,  $\text{CDCl}_3$ ):  $\delta$  158.8 (dd,  $J$  = 246.8, 4.8 Hz), 153.8, 147.8 (d,  $J$  = 257.5 Hz), 145.0 (d,  $J$  = 6.1 Hz), 142.3, 132.4, 127.0, 125.2 (d,  $J$  = 10.3 Hz), 123.7,

122.7 (d,  $J = 1.1$  Hz), 117.8, 112.7 (d,  $J = 14.1$  Hz), 110.0 (d,  $J = 22.8$  Hz), 107.0 (dd,  $J = 19.1, 9.3$  Hz), 86.4 (dd,  $J = 35.4, 8.0$  Hz), 51.0, 26.8.

$^{19}\text{F}$  NMR (376 MHz,  $\text{CDCl}_3$ ):  $\delta$  -98.77 (d,  $J = 16.9$  Hz), -120.98.

HRMS (ESI) calculated for  $\text{C}_{17}\text{H}_{12}\text{F}_2\text{N}_3$  ( $[\text{M}+\text{H}]^+$ ): 296.0994; found: 296.0987.

**7-fluoro-1-methyl-1,2-dihydrobenzo[4',5']imidazo[2',1':2,3][1,3]diazepino[6,7,1-*h*]indole (3m)**

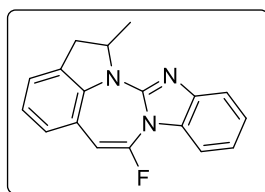

This compound was obtained in 93% yield (54.1 mg) as yellow solid, m.p.: 116-118 °C. Eluent: PE/EA = 5/1,  $R_f = 0.8$ .

$^1\text{H}$  NMR (400 MHz,  $\text{CDCl}_3$ ):  $\delta$  7.39 (d,  $J = 7.7$  Hz, 1H), 7.29-7.24 (m, 1H), 7.11 (t,  $J = 7.2$  Hz, 1H), 7.04 (t,  $J = 7.1$  Hz, 1H), 6.94 (d,  $J = 7.3$  Hz, 1H), 6.82 (t,  $J = 7.5$  Hz, 1H), 6.68 (d,  $J = 7.6$  Hz, 1H), 5.60 (d,  $J = 12.7$  Hz, 1H), 5.15-5.05 (m, 1H), 3.38 (dd,  $J = 16.2, 10.0$  Hz, 1H), 2.57 (dd,  $J = 16.2, 4.4$  Hz, 1H), 1.47 (d,  $J = 6.5$  Hz, 3H).

$^{13}\text{C}\{^1\text{H}\}$  NMR (100 MHz,  $\text{CDCl}_3$ ):  $\delta$  155.4, 147.4 (d,  $J = 256.4$  Hz), 143.6, 142.6, 132.1 (d,  $J = 1.9$  Hz), 131.2, 127.6 (d,  $J = 4.6$  Hz), 125.1 (d,  $J = 1.1$  Hz), 124.1, 123.4, 122.3 (d,  $J = 1.2$  Hz), 118.5 (d,  $J = 8.8$  Hz), 117.6, 112.5 (d,  $J = 13.0$  Hz), 94.0 (d,  $J = 31.6$  Hz), 57.1, 35.6, 21.9.

$^{19}\text{F}$  NMR (376 MHz,  $\text{CDCl}_3$ ):  $\delta$  -100.21 (d,  $J = 16.4$  Hz).

HRMS (ESI) calculated for  $\text{C}_{18}\text{H}_{15}\text{FN}_3$  ( $[\text{M}+\text{H}]^+$ ): 292.1245; found: 292.1240.

**7,11-difluoro-1,2-dihydrobenzo[4',5']imidazo[2',1':2,3][1,3]diazepino[6,7,1-*hi*]indole (3n)**

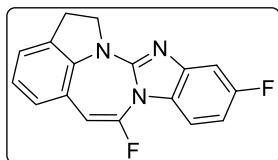

This compound was obtained in 45% yield (25.3 mg) as yellow solid, m.p.: 159-161 °C. Eluent: PE/EA = 5/1,  $R_f$  = 0.6.

**$^1\text{H}$  NMR (400 MHz,  $\text{CDCl}_3$ ):**  $\delta$  7.29-7.25 (m, 1H), 7.03-6.98 (m, 1H), 6.95 (d,  $J$  = 7.4 Hz, 1H), 6.87-6.77 (m, 2H), 6.66 (d,  $J$  = 7.5 Hz, 1H), 5.53 (d,  $J$  = 14.0 Hz, 1H), 4.24 (t,  $J$  = 8.8 Hz, 2H), 3.06 (t,  $J$  = 8.8 Hz, 2H).

**$^{13}\text{C}\{^1\text{H}\}$  NMR (100 MHz,  $\text{CDCl}_3$ ):** 159.2 (d,  $J$  = 238.1 Hz), 154.5, 147.1 (d,  $J$  = 256.2 Hz), 143.5, 138.7, 132.3 (d,  $J$  = 12.8 Hz), 132.0, 127.8 (d,  $J$  = 4.6 Hz), 125.2 (d,  $J$  = 1.1 Hz), 124.0, 117.8 (d,  $J$  = 9.8 Hz), 117.6 (d,  $J$  = 9.2 Hz), 110.7 (d,  $J$  = 24.1 Hz), 100.5 (dd,  $J$  = 29.9, 14.9 Hz), 93.7 (d,  $J$  = 31.7 Hz), 50.0, 27.4.

**$^{19}\text{F}$  NMR (376 MHz,  $\text{CDCl}_3$ ):**  $\delta$  -102.34 (d,  $J$  = 16.4 Hz), -119.85 (t,  $J$  = 13.8 Hz).

**HRMS (ESI)** calculated for  $\text{C}_{17}\text{H}_{12}\text{F}_2\text{N}_3$  ( $[\text{M}+\text{H}]^+$ ): 296.0994; found: 296.0988.

**7,10-difluoro-1,2-dihydrobenzo[4',5']imidazo[2',1':2,3][1,3]diazepino[6,7,1-*hi*]indole (3n')**

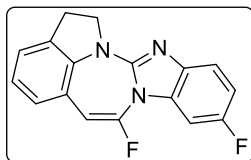

This compound was obtained in 37% yield (22.9 mg) as yellow solid, m.p.: 173-175 °C. Eluent: PE/EA = 5/1,  $R_f$  = 0.6.

**$^1\text{H}$  NMR (400 MHz,  $\text{CDCl}_3$ ):**  $\delta$  7.15 (dt,  $J$  = 9.0, 4.5 Hz, 1H), 7.05 (dd,  $J$  = 9.1, 2.4 Hz, 1H), 6.94 (d,  $J$  = 7.4 Hz, 1H), 6.82-6.70 (m, 2H), 6.63 (d,  $J$  = 7.5 Hz, 1H), 5.48 (d,  $J$  = 13.9 Hz, 1H), 4.23 (t,  $J$  = 8.8 Hz, 2H), 3.05 (t,  $J$  = 8.8 Hz, 2H).

**$^{13}\text{C}\{^1\text{H}\}$  NMR (100 MHz,  $\text{CDCl}_3$ ):**  $\delta$  160.0 (d,  $J$  = 237.3 Hz), 155.5, 147.3 (d,  $J$  = 254.9 Hz), 143.5, 143.4 (d,  $J$  = 3.3 Hz), 132.0, 128.7, 127.8 (d,  $J$  = 4.7 Hz), 125.1,



124.2, 117.9 (d,  $J = 9.3$  Hz), 112.8 (dd,  $J = 14.7, 9.8$  Hz), 109.43 (dd,  $J = 24.8, 1.9$  Hz), 104.4 (d,  $J = 25.1$  Hz), 93.3 (d,  $J = 31.9$  Hz), 49.9, 27.4.

$^{19}\text{F}$  NMR (376 MHz,  $\text{CDCl}_3$ ):  $\delta$  -101.39 (d,  $J = 17.4$  Hz), -119.60 – -119.84 (m).

HRMS (ESI) calculated for  $\text{C}_{17}\text{H}_{12}\text{F}_2\text{N}_3$  ( $[\text{M}+\text{H}]^+$ ): 296.0994; found: 296.0988.

**7-fluoro-9,11-dimethyl-1,2-dihydroindolo[1',7':3,4,5][1,3]diazepino[1,2-*e*]purine-10,12(9*H*,11*H*)-dione (3o)**

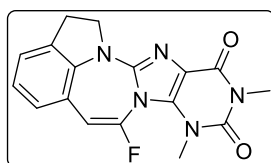

This compound was obtained in 98% yield (67.5 mg) as yellow solid, m.p.: 252-254

$^{\circ}\text{C}$ . Eluent: PE/EA = 2/1,  $R_f = 0.5$ .

$^1\text{H}$  NMR (400 MHz,  $\text{CDCl}_3$ ):  $\delta$  7.03 (d,  $J = 7.5$  Hz, 1H), 6.93 (t,  $J = 7.5$  Hz, 1H), 6.75 (d,  $J = 7.6$  Hz, 1H), 5.74 (d,  $J = 8.4$  Hz, 1H), 4.26 (t,  $J = 8.5$  Hz, 2H), 3.49 (s, 3H), 3.36 (s, 3H), 3.07 (t,  $J = 8.5$  Hz, 2H).

$^{13}\text{C}\{^1\text{H}\}$  NMR (100 MHz,  $\text{CDCl}_3$ ):  $\delta$  160.3, 152.7, 151.7, 150.4, 144.93 (d,  $J = 270.1$  Hz), 144.88, 132.7, 128.1 (d,  $J = 4.6$  Hz), 125.7, 125.3, 119.7 (d,  $J = 7.2$  Hz), 102.5 (d,  $J = 3.7$  Hz), 96.3 (d,  $J = 29.9$  Hz), 49.4, 30.1, 28.4, 27.7.

$^{19}\text{F}$  NMR (376 MHz,  $\text{CDCl}_3$ ):  $\delta$  -87.00.

HRMS (ESI) calculated for  $\text{C}_{17}\text{H}_{15}\text{FN}_5\text{O}_2$  ( $[\text{M}+\text{H}]^+$ ): 340.1204; found: 340.1202.

**10,11-dichloro-7-fluoro-1,2-dihydrobenzo[4',5']imidazo[2',1':2,3][1,3]diazepino[6,7,1-*hi*]indole (3p)**

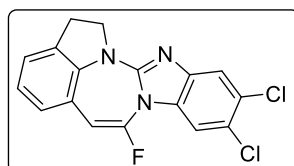

This compound was obtained in 70% yield (50.2 mg) as yellow solid, m.p.: 205-207

°C. Eluent: PE/EA = 5/1,  $R_f = 0.7$ .

$^1\text{H NMR}$  (400 MHz,  $\text{CDCl}_3$ ):  $\delta$  7.39 (s, 1H), 7.33 (d,  $J = 4.1$  Hz, 1H), 6.96 (d,  $J = 7.4$  Hz, 1H), 6.81 (t,  $J = 7.5$  Hz, 1H), 6.65 (d,  $J = 7.5$  Hz, 1H), 5.51 (d,  $J = 14.2$  Hz, 1H), 4.22 (t,  $J = 8.8$  Hz, 2H), 3.06 (t,  $J = 8.8$  Hz, 2H).

$^{13}\text{C}\{^1\text{H}\}$  NMR (100 MHz,  $\text{CDCl}_3$ ):  $\delta$  155.1, 146.7 (d,  $J = 255.0$  Hz), 142.8, 142.3, 132.1, 131.5 (d,  $J = 2.2$  Hz), 128.0 (d,  $J = 4.6$  Hz), 127.3, 125.72 (d,  $J = 1.2$  Hz), 125.4, 124.4, 118.6, 117.5 (d,  $J = 8.9$  Hz), 113.9 (d,  $J = 15.8$  Hz), 93.8 (d,  $J = 31.2$  Hz), 50.1, 27.3.

$^{19}\text{F NMR}$  (376 MHz,  $\text{CDCl}_3$ ):  $\delta$  -102.21 (d,  $J = 17.1$  Hz).

HRMS (ESI) calculated for  $\text{C}_{17}\text{H}_{11}\text{Cl}_2\text{FN}_3$  ( $[\text{M}+\text{H}]^+$ ): 346.0309; found: 346.0308.

#### General procedure for the synthesis of *gem*-difluorinated benzodiazepines **4**:

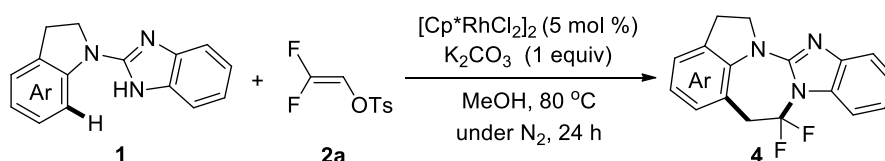

The mixture of *N*-benzo[*d*]imidazole indoline **1** (0.2 mmol, 1.0 equiv), 2,2-difluorovinyl tosylate **2a** (0.2 mmol, 1.0 equiv),  $[\text{Cp}^*\text{RhCl}_2]_2$  (5 mol %) and  $\text{K}_2\text{CO}_3$  (0.2 mmol, 1.0 equiv) in MeOH (2.0 mL) was stirred at 80°C in an oil bath under an atmosphere of  $\text{N}_2$  for 24 h. Afterwards, the solvent was removed under reduced pressure and the mixture was purified by preparative TLC (eluent: PE/EA = 5/1) to give the corresponding difluorinated benzodiazepine product **4**.

#### Characterization of products **4**:

7,7-difluoro-1,2,6,7-tetrahydrobenzo[4',5']imidazo[2',1':2,3][1,3]diazepino[6,7,1-*hi*]indole (**4a**)

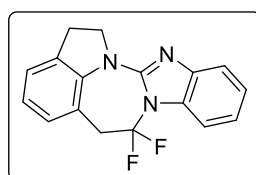

This compound was obtained in 50% yield (29.8 mg) as yellow solid, m.p.: 114-116 °C. Eluent: PE/EA = 5/1,  $R_f$  = 0.5. Monofluorinated benzodiazepine **3a** was formed in 25% yield (13.8 mg) under this condition.

$^1\text{H NMR}$  (400 MHz,  $\text{CDCl}_3$ ):  $\delta$  7.61 (d,  $J$  = 7.9 Hz, 1H), 7.53 (d,  $J$  = 8.0 Hz, 1H), 7.28-7.16 (m, 2H), 7.15-7.09 (m, 1H), 7.06 (d,  $J$  = 7.4 Hz, 1H), 6.99 (t,  $J$  = 7.4 Hz, 1H), 4.58 (t,  $J$  = 8.6 Hz, 2H), 3.69 (t,  $J$  = 10.5 Hz, 2H), 3.25 (t,  $J$  = 8.6 Hz, 2H).

$^{13}\text{C}\{^1\text{H}\}$  NMR (100 MHz,  $\text{CDCl}_3$ ):  $\delta$  147.8, 141.5, 141.4, 132.7, 131.8, 128.9, 125.1, 123.7, 123.3, 121.2, 118.8 (t,  $J$  = 251.5 Hz), 117.3, 114.3 (t,  $J$  = 5.9 Hz), 113.0 (t,  $J$  = 7.2 Hz), 52.0, 40.6 (t,  $J$  = 30.2 Hz), 27.6.

$^{19}\text{F NMR}$  (376 MHz,  $\text{CDCl}_3$ ):  $\delta$  -67.22 (t,  $J$  = 10.9 Hz).

HRMS (ESI) calculated for  $\text{C}_{17}\text{H}_{14}\text{F}_2\text{N}_3$  ( $[\text{M}+\text{H}]^+$ ): 298.1150; found: 298.1149.

### 3,7,7-trifluoro-1,2,6,7-tetrahydrobenzo[4',5']imidazo[2',1':2,3][1,3]diazepino[6,7,1-*hi*]indole (**4b**)

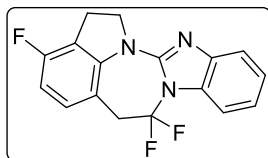

This compound was obtained in 48% yield (30.2 mg) as yellow solid, m.p.: 128-130 °C. Eluent: PE/EA = 5/1,  $R_f$  = 0.6. Monofluorinated benzodiazepine **3b** was formed in 23% yield (13.6 mg) under this condition.

$^1\text{H NMR}$  (400 MHz,  $\text{CDCl}_3$ ):  $\delta$  7.64-7.58 (m, 1H), 7.53 (dd,  $J$  = 7.6, 1.1 Hz, 1H), 7.28-7.21 (m, 1H), 7.16-7.11 (m, 1H), 7.03 (dd,  $J$  = 8.4, 5.2 Hz, 1H), 6.71 (t,  $J$  = 8.3 Hz, 1H), 4.66-4.58 (m, 2H), 3.67 (t,  $J$  = 10.4 Hz, 2H), 3.28 (t,  $J$  = 8.8 Hz, 2H).

$^{13}\text{C}\{^1\text{H}\}$  NMR (100 MHz,  $\text{CDCl}_3$ ):  $\delta$  160.3 (d,  $J$  = 243.3 Hz), 147.2, 142.6 (d,  $J$  = 6.2 Hz), 141.3, 132.8, 127.0 (d,  $J$  = 2.5 Hz), 125.1 (d,  $J$  = 10.1 Hz), 123.8, 121.6, 118.6 (t,  $J$  = 250.3 Hz), 117.5, 113.1 (t,  $J$  = 7.7 Hz), 108.9 (d,  $J$  = 23.3 Hz), 102.6 (dt,  $J$  = 12.4, 6.0 Hz), 53.0, 32.8 (td,  $J$  = 31.7, 5.0 Hz), 26.9.

$^{19}\text{F}$  NMR (376 MHz,  $\text{CDCl}_3$ ):  $\delta$  -67.88 (t,  $J$  = 10.4 Hz), -122.40 (d,  $J$  = 14.9 Hz).

HRMS (ESI) calculated for  $\text{C}_{17}\text{H}_{13}\text{F}_3\text{N}_3$  ( $[\text{M}+\text{H}]^+$ ): 316.1056; found: 316.1053.

**3-chloro-7,7-difluoro-1,2,6,7-tetrahydrobenzo[4',5']imidazo[2',1':2,3][1,3]diazepino[6,7,1-*hi*]indole (4c)**

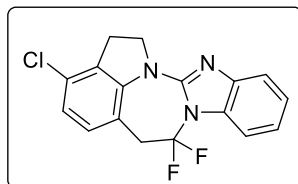

This compound was obtained in 52% yield (34.5 mg) as yellow solid, m.p.: 112-114 °C. Eluent: PE/EA = 5/1,  $R_f$  = 0.5. Monofluorinated benzodiazepine **3c** was formed in 17% yield (10.6 mg) under this condition.

$^1\text{H}$  NMR (400 MHz,  $\text{CDCl}_3$ ):  $\delta$  7.61 (d,  $J$  = 8.2 Hz, 1H), 7.53 (d,  $J$  = 7.9 Hz, 1H), 7.26-7.21 (m, 1H), 7.14 (t,  $J$  = 7.8 Hz, 1H), 7.04-6.95 (m, 2H), 4.60 (t,  $J$  = 8.7 Hz, 2H), 3.68 (t,  $J$  = 10.3 Hz, 2H), 3.28 (t,  $J$  = 8.8 Hz, 2H).

$^{13}\text{C}\{^1\text{H}\}$  NMR (100 MHz,  $\text{CDCl}_3$ ):  $\delta$  147.2, 142.5, 141.2, 132.7, 131.1, 130.4, 130.3, 123.8, 123.1, 121.6, 118.5 (t,  $J$  = 252.2 Hz), 117.5, 113.1 (t,  $J$  = 7.3 Hz), 112.4 (t,  $J$  = 5.9 Hz), 51.8, 40.35 (t,  $J$  = 30.3 Hz), 27.2.

$^{19}\text{F}$  NMR (376 MHz,  $\text{CDCl}_3$ ):  $\delta$  -67.52 (t,  $J$  = 11.7 Hz).

HRMS (ESI) calculated for  $\text{C}_{17}\text{H}_{13}\text{ClF}_2\text{N}_3$  ( $[\text{M}+\text{H}]^+$ ): 332.0761; found: 332.0758.

**3-(benzyloxy)-7,7-difluoro-1,2,6,7-tetrahydrobenzo[4',5']imidazo[2',1':2,3][1,3]diazepino[6,7,1-*hi*]indole (4d)**

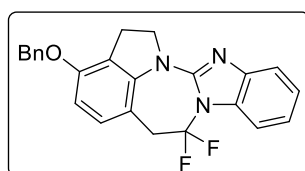

This compound was obtained in 35% yield (28.2 mg) as yellow solid, m.p.: 192-194 °C. Eluent: PE/EA = 5/1,  $R_f$  = 0.6. Monofluorinated benzodiazepine **3f** was formed in 30% yield (22.9 mg) under this condition.

**<sup>1</sup>H NMR (400 MHz, CDCl<sub>3</sub>):** δ 7.61 (d, *J* = 8.0 Hz, 1H), 7.52 (d, *J* = 8.2 Hz, 1H), 7.44-7.36 (m, 4H), 7.36-7.31 (m, 1H), 7.23 (t, *J* = 7.5 Hz, 1H), 7.15-7.09 (m, 1H), 7.01 (d, *J* = 8.3 Hz, 1H), 6.60 (d, *J* = 8.3 Hz, 1H), 5.12 (s, 2H), 4.65-4.54 (m, 2H), 3.65 (t, *J* = 10.5 Hz, 2H), 3.24 (t, *J* = 8.7 Hz, 2H).

**<sup>13</sup>C{<sup>1</sup>H} NMR (100 MHz, CDCl<sub>3</sub>):** δ 155.5, 147.9, 142.7, 141.4, 136.9, 132.8, 130.2, 128.8, 128.2, 127.3, 123.7, 121.2, 119.2, 118.9 (t, *J* = 251.8 Hz), 117.3, 113.1 (t, *J* = 7.3 Hz), 107.4 (t, *J* = 6.0 Hz), 107.2, 70.2, 52.6, 40.1 (t, *J* = 29.9 Hz), 25.0.

**<sup>19</sup>F NMR (376 MHz, CDCl<sub>3</sub>):** δ -67.81.

**HRMS (ESI)** calculated for C<sub>24</sub>H<sub>20</sub>F<sub>2</sub>N<sub>3</sub>O ([M+H]<sup>+</sup>): 404.1569; found: 404.1566.

### methyl

**7,7-difluoro-1,2,6,7-tetrahydrobenzo[4',5']imidazo[2',1':2,3][1,3]diazepino[6,7,1-*hi*]indole-3-carboxylate (4e)**

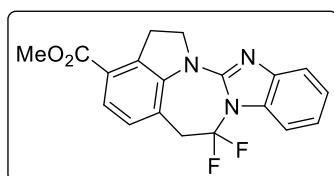

This compound was obtained in 57% yield (40.5 mg) as yellow solid, m.p.: 156-157 °C. Eluent: PE/EA = 5/1, R<sub>f</sub> = 0.5.

**<sup>1</sup>H NMR (400 MHz, CDCl<sub>3</sub>):** δ 7.66 (d, *J* = 7.9 Hz, 1H), 7.61 (d, *J* = 8.0 Hz, 1H), 7.54 (d, *J* = 8.0 Hz, 1H), 7.27-7.23 (m, 1H), 7.18-7.10 (m, 2H), 4.62 (t, *J* = 8.7 Hz, 2H), 3.92 (s, 3H), 3.73 (t, *J* = 10.3 Hz, 2H), 3.61 (t, *J* = 8.7 Hz, 2H).

**<sup>13</sup>C{<sup>1</sup>H} NMR (100 MHz, CDCl<sub>3</sub>):** δ 166.4, 147.5, 142.7, 141.2, 135.1, 132.7, 129.3, 127.1, 124.6, 123.9, 121.5, 118.4 (t, *J* = 251.4 Hz), 118.2 (t, *J* = 5.7 Hz), 117.5, 113.0 (t, *J* = 6.9 Hz), 52.3, 52.2, 40.8 (t, *J* = 30.3 Hz), 29.1.

**<sup>19</sup>F NMR (376 MHz, CDCl<sub>3</sub>):** δ -66.82 – -66.80 (m).

**HRMS (ESI)** calculated for C<sub>19</sub>H<sub>16</sub>F<sub>2</sub>N<sub>3</sub>O<sub>2</sub> ([M+H]<sup>+</sup>): 356.1205; found: 356.1198.

**7,7-difluoro-4-methyl-1,2,6,7-tetrahydrobenzo[4',5']imidazo[2',1':2,3][1,3]diazepino[6,7,1-*hi*]indole (4f)**

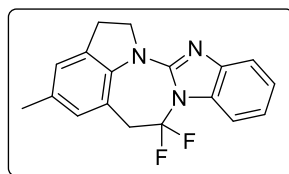

This compound was obtained in 48% yield (29.9 mg) as yellow solid, m.p.: 167-169 °C. Eluent: PE/EA = 5/1,  $R_f$  = 0.5. Monofluorinated benzodiazepine **3h** was formed in 20% yield (11.7 mg) under this condition.

$^1\text{H NMR}$  (400 MHz,  $\text{CDCl}_3$ ):  $\delta$  7.60 (d,  $J$  = 8.0 Hz, 1H), 7.51 (d,  $J$  = 7.9 Hz, 1H), 7.22 (t,  $J$  = 7.6 Hz, 1H), 7.10 (t,  $J$  = 7.5 Hz, 1H), 7.02 (s, 1H), 6.87 (s, 1H), 4.55 (t,  $J$  = 8.7 Hz, 2H), 3.66 (t,  $J$  = 10.5 Hz, 2H), 3.22 (t,  $J$  = 8.6 Hz, 2H), 2.33 (s, 3H).

$^{13}\text{C}\{^1\text{H}\}$  NMR (100 MHz,  $\text{CDCl}_3$ ):  $\delta$  148.0, 141.5, 139.2, 133.2, 132.7, 132.0, 129.2, 125.9, 123.6, 121.1, 118.9 (t,  $J$  = 251.6 Hz), 117.2, 114.0 (t,  $J$  = 5.8 Hz), 113.0 (t,  $J$  = 7.3 Hz), 52.1, 40.6 (t,  $J$  = 30.1 Hz), 27.6, 20.9.

$^{19}\text{F NMR}$  (376 MHz,  $\text{CDCl}_3$ ):  $\delta$  -67.15 (t,  $J$  = 11.3 Hz).

HRMS (ESI) calculated for  $\text{C}_{18}\text{H}_{16}\text{F}_2\text{N}_3$  ( $[\text{M}+\text{H}]^+$ ): 312.1307; found: 312.1304.

**4-bromo-7,7-difluoro-1,2,6,7-tetrahydrobenzo[4',5']imidazo[2',1':2,3][1,3]diazepino[6,7,1-*hi*]indole (4g)**

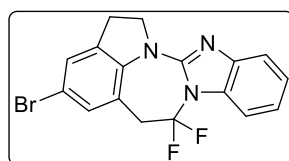

This compound was obtained in 45% yield (33.6 mg) as yellow solid, m.p.: 168-170 °C. Eluent: PE/EA = 50/1,  $R_f$  = 0.2. Monofluorinated benzodiazepine **3j** was formed in 18% yield (12.8 mg) under this condition.

$^1\text{H NMR}$  (400 MHz,  $\text{CDCl}_3$ ):  $\delta$  7.64-7.56 (m, 1H), 7.52 (d,  $J$  = 7.9 Hz, 1H), 7.32-6.96 (m, 4H), 4.61-4.52 (m, 2H), 3.74-3.59 (m, 2H), 3.31-3.19 (m, 2H).

$^{13}\text{C}\{^1\text{H}\}$  NMR (100 MHz,  $\text{CDCl}_3$ ):  $\delta$  147.3, 141.2, 140.7, 134.2, 132.7, 131.5, 128.2, 123.8, 121.6, 118.4 (t,  $J = 252.0$  Hz), 117.5, 115.6 (t,  $J = 6.1$  Hz), 115.2, 113.1 (t,  $J = 7.1$  Hz), 52.3, 40.4 (t,  $J = 30.7$  Hz), 27.5.

$^{19}\text{F}$  NMR (376 MHz,  $\text{CDCl}_3$ ):  $\delta$  -67.28 – -67.17 (m).

HRMS (ESI) calculated for  $\text{C}_{17}\text{H}_{13}\text{BrF}_2\text{N}_3$  ( $[\text{M}+\text{H}]^+$ ): 376.0255; found: 376.0254.

**5,7,7-trifluoro-1,2,6,7-tetrahydrobenzo[4',5']imidazo[2',1':2,3][1,3]diazepino[6,7,1-*hi*]indole (4h)**

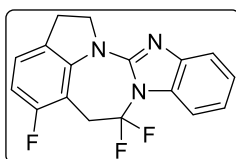

This compound was obtained in 41% yield (25.8 mg) as yellow solid, m.p.: 156-158 °C. Eluent: PE/EA = 5/1,  $R_f = 0.5$ . Monofluorinated benzodiazepine **3I** was formed in 19% yield (11.2 mg) under this condition.

$^1\text{H}$  NMR (400 MHz,  $\text{CDCl}_3$ ):  $\delta$  7.62 (d,  $J = 8.1$  Hz, 1H), 7.53 (d,  $J = 7.8$  Hz, 1H), 7.29-7.21 (m, 1H), 7.18-7.08 (m, 2H), 6.78-6.69 (m, 1H), 4.60 (t,  $J = 8.7$  Hz, 2H), 3.79 (t,  $J = 10.3$  Hz, 2H), 3.22 (t,  $J = 8.7$  Hz, 2H).

$^{13}\text{C}\{^1\text{H}\}$  NMR (100 MHz,  $\text{CDCl}_3$ ):  $\delta$  160.3 (d,  $J = 244.5$  Hz), 147.2, 142.6 (d,  $J = 6.2$  Hz), 141.3, 132.8, 127.0 (d,  $J = 2.5$  Hz), 125.1 (d,  $J = 10.1$  Hz), 123.8, 121.6, 118.6 (t,  $J = 252.8$  Hz), 117.5, 113.1 (t,  $J = 7.7$  Hz), 108.9 (d,  $J = 23.4$  Hz), 102.6 (dt,  $J = 12.4$ , 6.0 Hz), 53.0, 32.8 (td,  $J = 31.7$ , 5.0 Hz), 26.9.

$^{19}\text{F}$  NMR (376 MHz,  $\text{CDCl}_3$ ):  $\delta$  -67.88 (t,  $J = 10.4$  Hz), -122.40 (d,  $J = 14.9$  Hz).

HRMS (ESI) calculated for  $\text{C}_{17}\text{H}_{13}\text{F}_3\text{N}_3$  ( $[\text{M}+\text{H}]^+$ ): 316.1056; found: 316.1052.

**7,7-difluoro-1-methyl-1,2,6,7-tetrahydrobenzo[4',5']imidazo[2',1':2,3][1,3]diazepino[6,7,1-*hi*]indole (4i)**

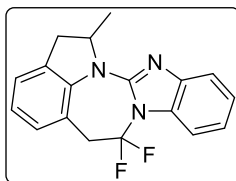

This compound was obtained in 50% yield (31.0 mg) as yellow solid, m.p.: 171-173 °C. Eluent: PE/EA = 5/1,  $R_f$  = 0.5.

$^1\text{H}$  NMR (400 MHz,  $\text{CDCl}_3$ ):  $\delta$  7.60 (dd,  $J$  = 8.0, 3.3 Hz, 1H), 7.52 (d,  $J$  = 7.9 Hz, 1H), 7.25-7.17 (m, 2H), 7.10 (t,  $J$  = 7.4 Hz, 2H), 7.02 (t,  $J$  = 7.4 Hz, 1H), 5.43-5.32 (m, 1H), 3.73-3.60 (m, 2H), 3.55 (dd,  $J$  = 16.3, 9.8 Hz, 1H), 2.72 (d,  $J$  = 16.2 Hz, 1H), 1.52 (d,  $J$  = 6.5 Hz, 3H).

$^{13}\text{C}\{^1\text{H}\}$  NMR (100 MHz,  $\text{CDCl}_3$ ):  $\delta$  147.7, 141.4, 141.1, 132.6 (d,  $J$  = 1.6 Hz), 130.8, 128.8, 125.4, 123.7, 123.6, 121.4, 118.92 (dd,  $J$  = 251.2, 247.4 Hz), 117.2, 115.1 (d,  $J$  = 11.1 Hz), 113.0 (d,  $J$  = 11.2 Hz), 59.8, 40.20 (t,  $J$  = 29.8 Hz), 35.8, 21.7.

$^{19}\text{F}$  NMR (376 MHz,  $\text{CDCl}_3$ ):  $\delta$  -68.80 – -67.44 (m), -65.11 – -64.50 (m).

HRMS (ESI) calculated for  $\text{C}_{18}\text{H}_{16}\text{F}_2\text{N}_3$  ( $[\text{M}+\text{H}]^+$ ): 312.1307; found: 312.1303.

### III. Mechanistic Studies

#### Deuterium-labeling experiments:

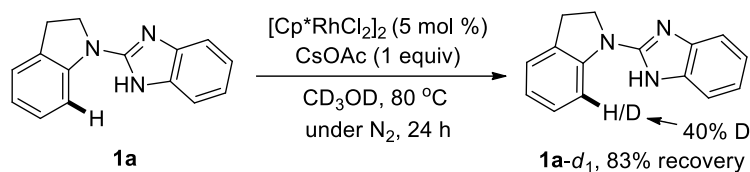

The mixture of *N*-benzo[*d*]imidazole indoline **1a** (0.1 mmol, 1.0 equiv),  $[\text{Cp}^*\text{RhCl}_2]_2$  (5 mol %) and CsOAc (0.1 mmol, 1.0 equiv) in  $\text{CD}_3\text{OD}$  (1.0 mL) was stirred at 80 °C in an oil bath under an atmosphere of  $\text{N}_2$  for 24 h. Afterwards, the solvent was removed under reduced pressure and **1a** was recovered by preparative TLC in 83% (19.8 mg) yield and analyzed by  $^1\text{H}$ -NMR spectroscopy. 40% deuteration was observed on the basis of the doublet at  $\delta$  8.26 (0.60H).



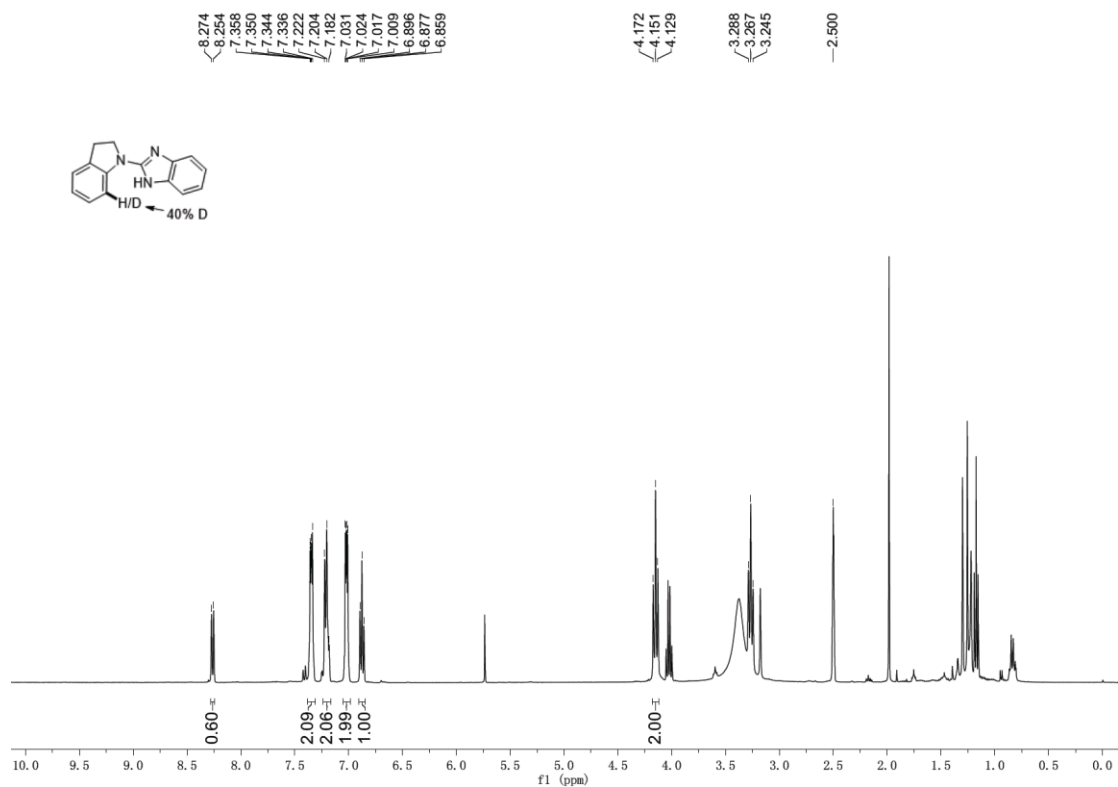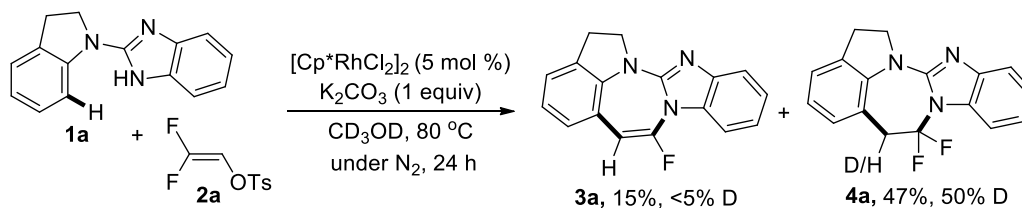

The mixture of *N*-benzo[*d*]imidazole indoline **1a** (0.1 mmol, 1.0 equiv), 2,2-difluorovinyl tosylate **2a** (0.1 mmol, 1.0 equiv), [Cp\**RhCl*<sub>2</sub>]<sub>2</sub> (5 mol %) and K<sub>2</sub>CO<sub>3</sub> (0.1 mmol, 1.0 equiv) in CD<sub>3</sub>OD (1.0 mL) was stirred at 80 °C in an oil bath under an atmosphere of N<sub>2</sub> for 24 h. Afterwards, the solvent was removed under reduced pressure and **3a** was obtained by preparative TLC in 15% (4.1 mg) yield and analyzed by <sup>1</sup>H-NMR spectroscopy. No obvious deuterium incorporation was found in **3a**. **4a** was obtained by preparative TLC in 47% (14.0 mg) yield and analyzed by <sup>1</sup>H-NMR spectroscopy. 50% deuteration was observed on the basis of the multiplet at δ 3.72-3.66 (1.0H).

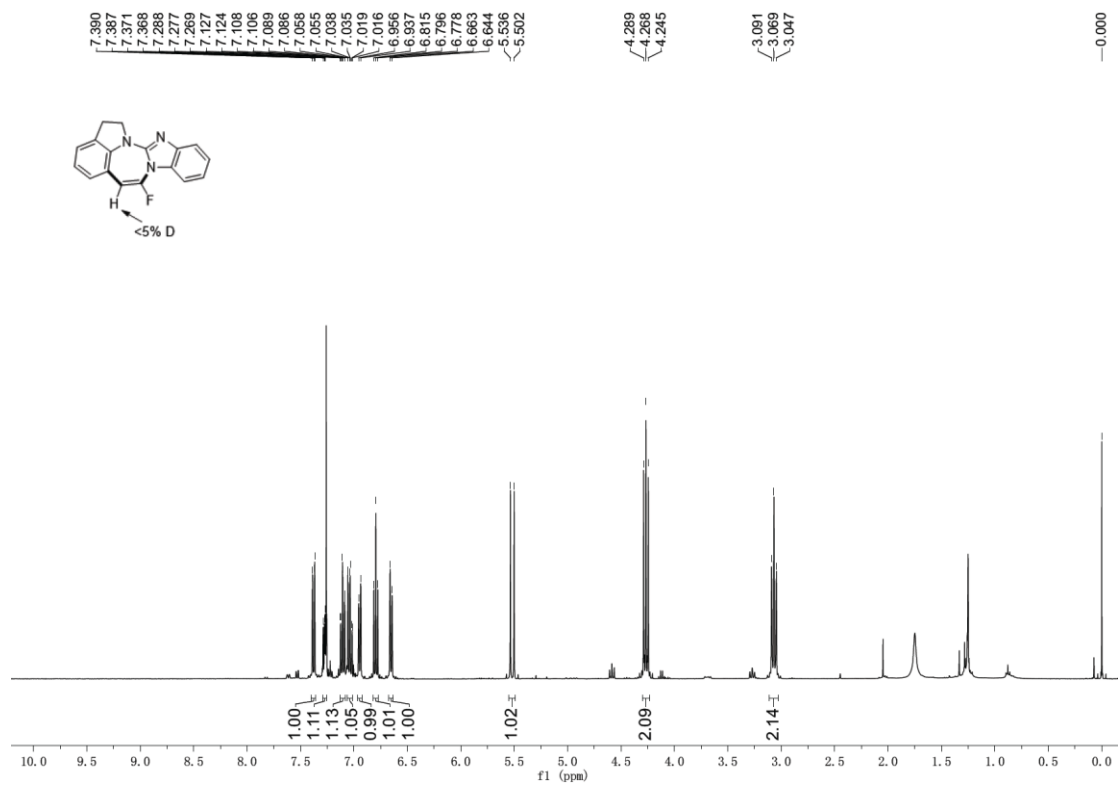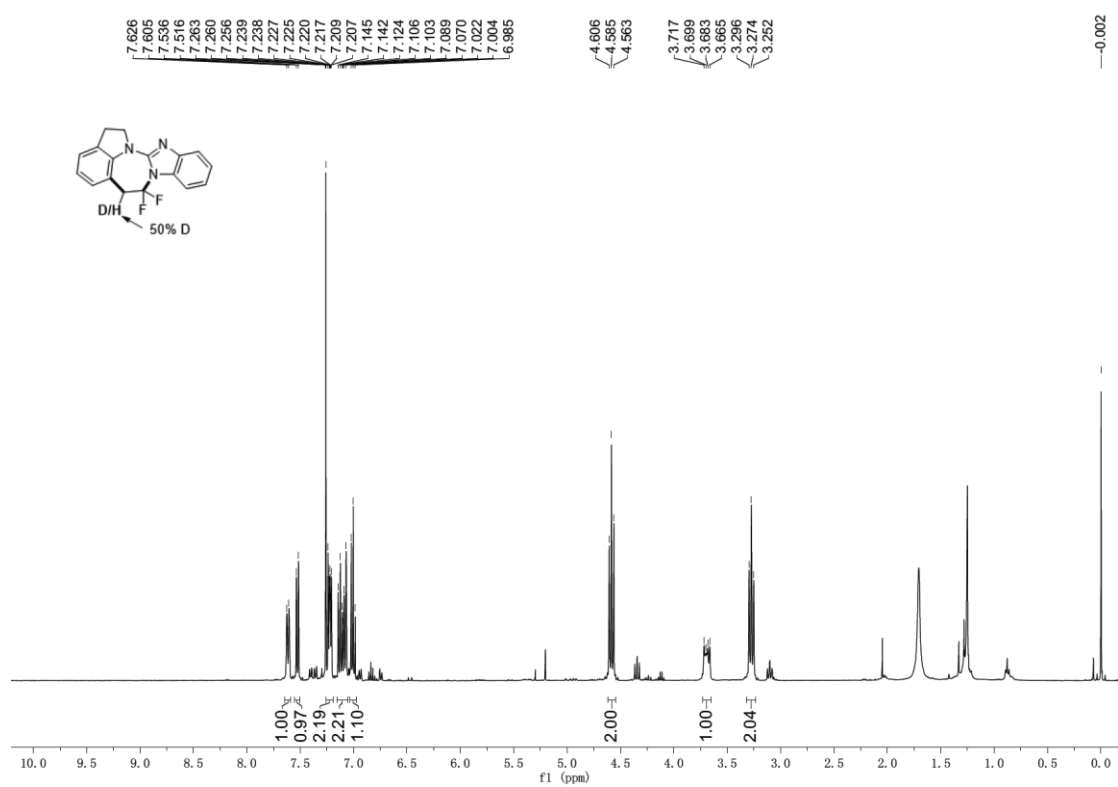

**Control experiments:**

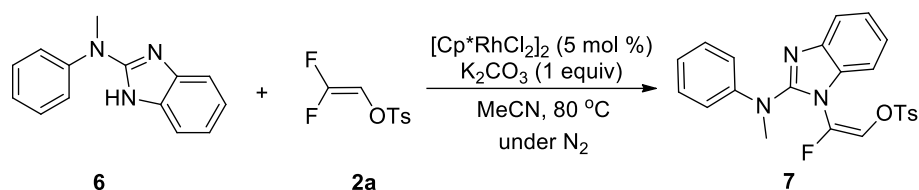

The mixture of *N*-methyl-*N*-phenyl-1*H*-benzo[*d*]imidazol-2-amine **6** (0.1 mmol, 1.0 equiv), 2,2-difluorovinyl tosylate **2a** (0.1 mmol, 1.0 equiv), [Cp\**RhCl*<sub>2</sub>]<sub>2</sub> (5 mol %) and K<sub>2</sub>CO<sub>3</sub> (0.1 mmol, 1.0 equiv) in MeCN (1.0 mL) was stirred at 80 °C in an oil bath under an atmosphere of N<sub>2</sub> for 24 h. Afterwards, the solvent was removed under reduced pressure and the mixture was purified by preparative TLC (eluent: PE/EA = 5/1) to give the corresponding product **7** (5.3 mg, 12%).

**(*E*)-2-fluoro-2-(2-(methyl(phenyl)amino)-1*H*-benzo[*d*]imidazol-1-yl)vinyl 4-methylbenzenesulfonate (**7**)**

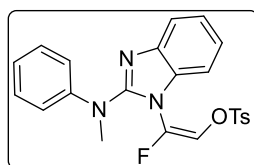

This compound was obtained in 12% yield (5.3 mg) as colorless oil. Eluent: PE/EA = 5/1, R<sub>f</sub> = 0.6.

<sup>1</sup>H NMR (400 MHz, CD<sub>3</sub>OD): δ 7.51-7.47 (m, 2H), 7.40 (d, *J* = 8.0 Hz, 1H), 7.35-7.30 (m, 2H), 7.23-7.18 (m, 2H), 7.17-7.11 (m, 4H), 6.97-6.92 (m, 1H), 6.70 (d, *J* = 2.6 Hz, 1H), 6.56 (d, *J* = 8.4 Hz, 1H), 3.52 (s, 3H), 2.35 (s, 3H).

<sup>13</sup>C{<sup>1</sup>H} NMR (100 MHz, CDCl<sub>3</sub>): δ 152.9 (d, *J* = 1.5 Hz), 146.0, 145.0, 142.9 (d, *J* = 260.6 Hz), 141.9, 133.7 (d, *J* = 4.9 Hz), 130.9, 129.9, 129.6, 127.7, 125.8, 123.7, 123.3, 121.6, 120.4, 119.7, 117.4, 109.0, 41.7, 21.9.

<sup>19</sup>F NMR (376 MHz, CDCl<sub>3</sub>): δ -119.87.

HRMS (ESI) calculated for C<sub>23</sub>H<sub>21</sub>FN<sub>3</sub>O<sub>3</sub>S ([M+H]<sup>+</sup>): 438.1282; found: 438.1275.

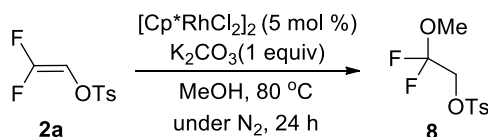

The mixture of 2,2-difluorovinyl tosylate **2a** (0.1 mmol, 1.0 equiv), [Cp\*RhCl<sub>2</sub>]<sub>2</sub> (5 mol %) and K<sub>2</sub>CO<sub>3</sub> (0.1 mmol, 1.0 equiv) in MeOH (1.0 mL) was stirred at 80 °C in an oil bath under an atmosphere of N<sub>2</sub> for 24 h. Afterwards, the solvent was removed under reduced pressure and the mixture was purified by preparative TLC (eluent: PE/EA = 5/1) to give the corresponding product **8** (10.9 mg, 41%).

### 2,2-difluoro-2-methoxyethyl 4-methylbenzenesulfonate (**8**)

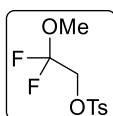

This compound was obtained in 41% yield (10.9 mg) as colorless oil. Eluent: PE/EA = 5/1, R<sub>f</sub> = 0.4.

<sup>1</sup>H NMR (400 MHz, CDCl<sub>3</sub>): δ 7.81 (d, *J* = 8.3 Hz, 2H), 7.37 (d, *J* = 8.3 Hz, 2H), 4.19 (t, *J* = 8.1 Hz, 2H), 3.53 (s, 3H), 2.46 (s, 3H).

<sup>13</sup>C{<sup>1</sup>H} NMR (100 MHz, CDCl<sub>3</sub>): δ 145.6, 132.3, 130.1, 128.2, 120.8 (t, *J* = 263.6 Hz), 66.8 (t, *J* = 38.4 Hz), 50.54 (t, *J* = 7.1 Hz), 21.8.

<sup>19</sup>F NMR (376 MHz, CDCl<sub>3</sub>): -83.71 (d, *J* = 12.5 Hz)

HRMS (ESI) calculated for C<sub>10</sub>H<sub>13</sub>F<sub>2</sub>O<sub>4</sub>S ([M+H]<sup>+</sup>): 267.0497; found: 267.0497.

### Synthesis and catalytic reactivity of rhodacycle A':

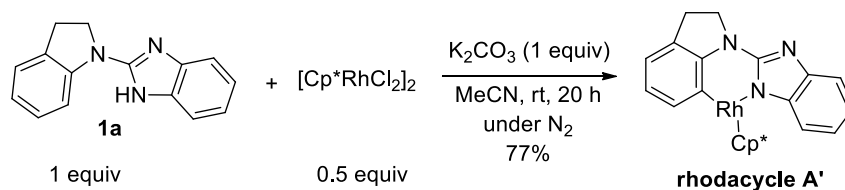

The mixture of *N*-benzo[*d*]imidazole indoline **1a** (0.1 mmol, 1.0 equiv), [Cp\*RhCl<sub>2</sub>]<sub>2</sub> (0.05 mmol, 0.5 equiv) and K<sub>2</sub>CO<sub>3</sub> (0.1 mmol, 1.0 equiv) in MeCN (1.0 mL) was stirred at room temperature for 20 h under an atmosphere of N<sub>2</sub>. Afterwards, the mixture was filtered to remove the insoluble precipitate and resulted in the <sup>1</sup>H-NMR pure rhodacycle A' in 77% isolated yield.

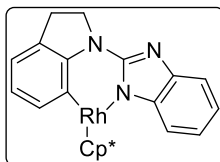

$^1\text{H}$  NMR (400 MHz,  $\text{DMSO-}d_6$ ):  $\delta$  7.50 (d,  $J = 7.9$  Hz, 1H), 7.42 (d,  $J = 7.6$  Hz, 1H), 7.27-7.20 (m, 2H), 7.15 (t,  $J = 7.5$  Hz, 1H), 7.00 (d,  $J = 7.0$  Hz, 1H), 6.90 (t,  $J = 7.4$  Hz, 1H), 4.26-4.14 (m, 2H), 3.34-3.27 (m, 2H), 1.44 (s, 15H).

$^{13}\text{C}\{^1\text{H}\}$  NMR (100 MHz,  $\text{DMSO-}d_6$ ):  $\delta$  148.2, 142.7, 139.2, 137.6, 135.0, 130.1, 129.8, 127.5, 123.9, 121.5, 121.4, 121.3, 115.5, 111.0, 101.02, 100.97, 94.42, 94.36, 47.8, 28.1, 9.0.

HRMS (ESI) calculated for  $\text{C}_{25}\text{H}_{27}\text{N}_3\text{Rh}$  ( $[\text{M}+\text{H}]^+$ ): 472.1255; found: 472.1251.

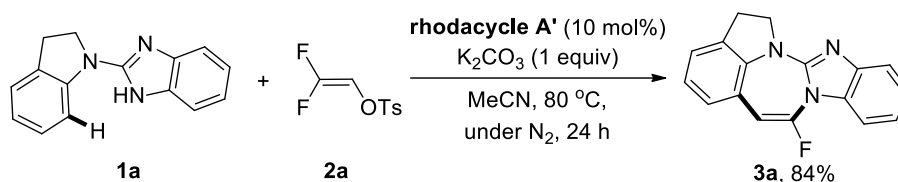

The mixture of *N*-benzo[*d*]imidazole indoline **1a** (0.1 mmol, 1.0 equiv), 2,2-difluorovinyl tosylate **2a** (0.1 mmol, 1.0 equiv), rhodacycle A' (10 mol %) and  $\text{K}_2\text{CO}_3$  (0.1 mmol, 1.0 equiv) in MeCN (1.0 mL) was stirred at 80 °C in an oil bath under an atmosphere of  $\text{N}_2$  for 24 h. Afterwards, the solvent was removed under reduced pressure and the mixture was purified by preparative TLC (eluent: PE/EA = 5/1) to give the corresponding product **3a** (23.3 mg, 84%).

### Detection of potential intermediates:

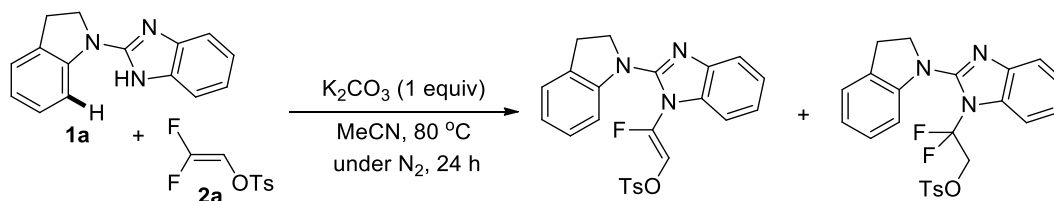

The mixture of *N*-benzo[*d*]imidazole indoline **1a** (0.1 mmol, 1.0 equiv), 2,2-difluorovinyl tosylate **2a** (0.1 mmol, 1.0 equiv) and  $\text{K}_2\text{CO}_3$  (0.1 mmol, 1.0 equiv)

in MeCN (1.0 mL) was stirred at 80 °C in an oil bath under an atmosphere of N<sub>2</sub> for 24 h. Afterwards, the mixture was analyzed by LC-HRMS and both *N*-alkenylation intermediate and nucleophilic addition intermediate could be detected.

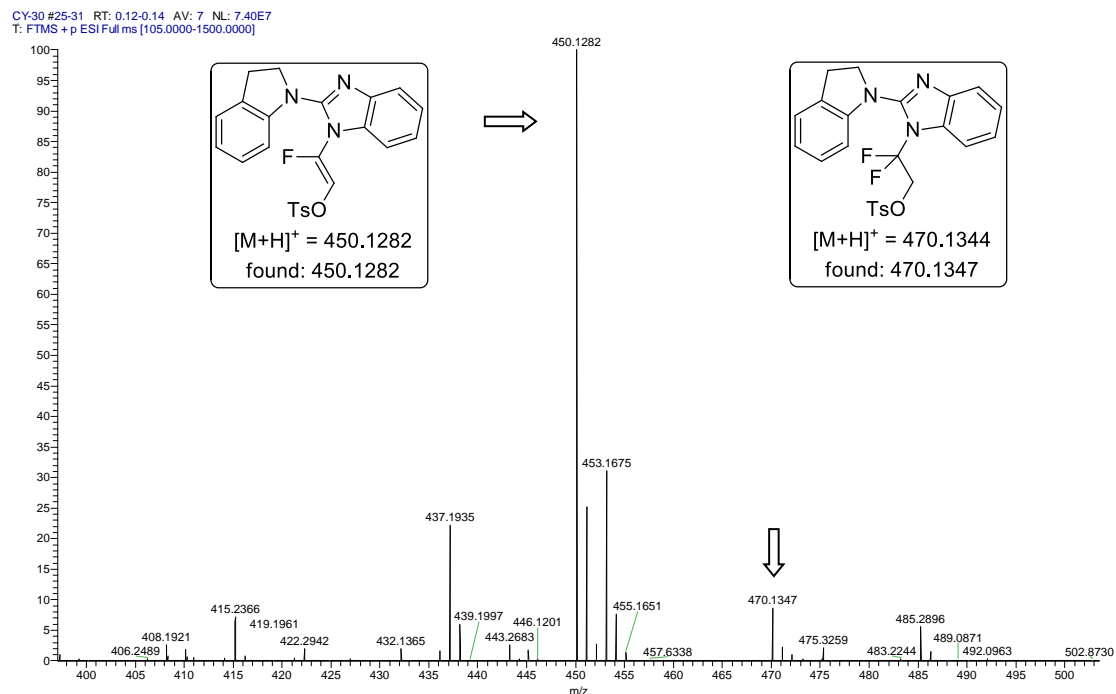

Another LC-HRMS analysis of the crude reaction mixtures under both conditions A and B revealed that the formation of TsOH could be detected.

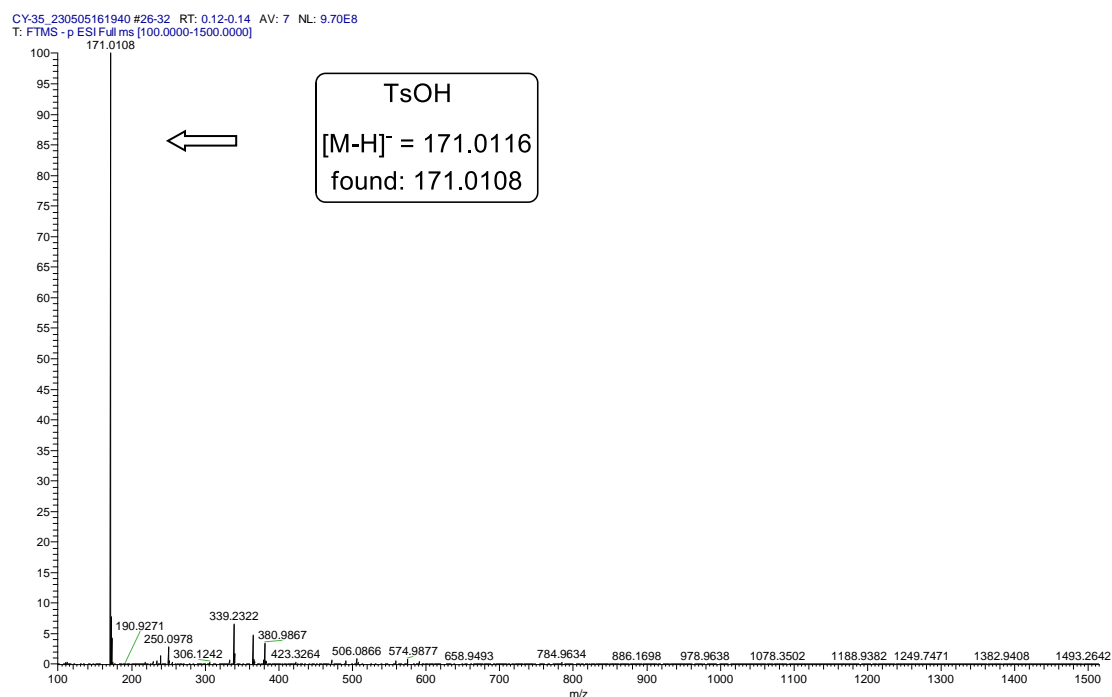

## IV. X-Ray Crystallographic Data

### Compound 3c (CCDC 2213792):

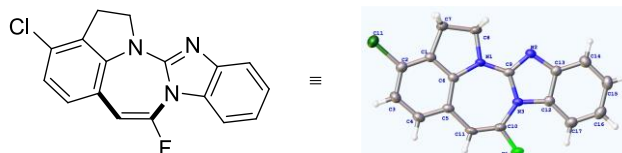

**Experimental:** A suitable crystal was selected and on a SuperNova, Dual, Cu at zero, AtlasS2 diffractometer. The crystal was kept at 150.00(10) K during data collection.

**Crystal Data** for  $C_{17}H_{11}ClFN_3$  ( $M = 311.74$  g/mol): monoclinic, space group  $P2_1/c$  (no. 14),  $a = 19.5807(14)$  Å,  $b = 4.7294(3)$  Å,  $c = 14.8063(10)$  Å,  $\beta = 106.738(7)^\circ$ ,  $V = 1313.04(16)$  Å<sup>3</sup>,  $Z = 4$ ,  $T = 150.00(10)$  K,  $\mu(\text{Mo K}\alpha) = 0.302$  mm<sup>-1</sup>,  $D_{\text{calc}} = 1.577$  g/cm<sup>3</sup>, 5097 reflections measured ( $4.344^\circ \leq 2\theta \leq 50^\circ$ ), 2317 unique ( $R_{\text{int}} = 0.0212$ ,  $R_{\text{sigma}} = 0.0314$ ) which were used in all calculations. The final  $R_1$  was 0.0361 ( $I > 2\sigma(I)$ ) and  $wR_2$  was 0.0897 (all data).

Table S2 Crystal data and structure refinement for 0062.

|                                    |                                |
|------------------------------------|--------------------------------|
| Identification code                | 0062                           |
| Empirical formula                  | $C_{17}H_{11}ClFN_3$           |
| Formula weight                     | 311.74                         |
| Temperature/K                      | 150.00(10)                     |
| Crystal system                     | monoclinic                     |
| Space group                        | $P2_1/c$                       |
| $a/\text{Å}$                       | 19.5807(14)                    |
| $b/\text{Å}$                       | 4.7294(3)                      |
| $c/\text{Å}$                       | 14.8063(10)                    |
| $\alpha/^\circ$                    | 90                             |
| $\beta/^\circ$                     | 106.738(7)                     |
| $\gamma/^\circ$                    | 90                             |
| Volume/Å <sup>3</sup>              | 1313.04(16)                    |
| $Z$                                | 4                              |
| $\rho_{\text{calc}}/\text{g/cm}^3$ | 1.577                          |
| $\mu/\text{mm}^{-1}$               | 0.302                          |
| $F(000)$                           | 640.0                          |
| Crystal size/mm <sup>3</sup>       | $0.15 \times 0.13 \times 0.12$ |

|                                                  |                                                               |
|--------------------------------------------------|---------------------------------------------------------------|
| Radiation                                        | Mo K $\alpha$ ( $\lambda = 0.71073$ )                         |
| 2 $\Theta$ range for data collection/ $^{\circ}$ | 4.344 to 50                                                   |
| Index ranges                                     | $-20 \leq h \leq 23, -5 \leq k \leq 4, -17 \leq l \leq 10$    |
| Reflections collected                            | 5097                                                          |
| Independent reflections                          | 2317 [ $R_{\text{int}} = 0.0212, R_{\text{sigma}} = 0.0314$ ] |
| Data/restraints/parameters                       | 2317/0/199                                                    |
| Goodness-of-fit on $F^2$                         | 1.036                                                         |
| Final R indexes [ $I \geq 2\sigma(I)$ ]          | $R_1 = 0.0361, wR_2 = 0.0837$                                 |
| Final R indexes [all data]                       | $R_1 = 0.0445, wR_2 = 0.0897$                                 |
| Largest diff. peak/hole / $e \text{ \AA}^{-3}$   | 0.20/-0.27                                                    |

*Table S3* Fractional Atomic Coordinates ( $\times 10^4$ ) and Equivalent Isotropic Displacement Parameters ( $\text{\AA}^2 \times 10^3$ ) for 0062.  $U_{\text{eq}}$  is defined as 1/3 of of the trace of the orthogonalised  $U_{\text{ij}}$  tensor.

| Atom | x          | y          | z          | $U(\text{eq})$ |
|------|------------|------------|------------|----------------|
| C11  | 118.3(3)   | 9307.2(11) | 3606.4(4)  | 37.55(17)      |
| F1   | 3927.8(6)  | 1282(2)    | 4092.5(8)  | 37.3(3)        |
| N1   | 2102.4(8)  | 2815(3)    | 5137.8(10) | 24.2(4)        |
| N2   | 2706.9(8)  | -712(3)    | 6138.9(10) | 23.5(4)        |
| N3   | 3209.4(8)  | 635(3)     | 5010.1(10) | 21.9(3)        |
| C1   | 1249.3(10) | 5913(4)    | 4347.2(12) | 22.8(4)        |
| C2   | 929.7(10)  | 7753(4)    | 3626.7(13) | 26.9(4)        |
| C3   | 1240.6(11) | 8338(4)    | 2919.0(13) | 30.2(5)        |
| C4   | 1874.5(10) | 7000(4)    | 2941.2(13) | 28.0(4)        |
| C5   | 2219.9(9)  | 5107(4)    | 3650.6(12) | 22.6(4)        |
| C6   | 1883.5(9)  | 4601(3)    | 4351.0(12) | 20.9(4)        |
| C7   | 1013.5(10) | 4981(4)    | 5179.7(13) | 29.2(4)        |
| C8   | 1607.7(10) | 3000(4)    | 5719.4(13) | 28.4(4)        |
| C9   | 2652.8(9)  | 949(4)     | 5420.1(12) | 20.9(4)        |
| C10  | 3300.4(10) | 2052(4)    | 4223.9(13) | 24.8(4)        |
| C11  | 2897.9(10) | 3878(4)    | 3635.3(12) | 25.2(4)        |
| C12  | 3661.9(10) | -1472(4)   | 5552.8(12) | 23.3(4)        |
| C13  | 3332.1(10) | -2250(4)   | 6239.5(13) | 23.9(4)        |
| C14  | 3628.1(10) | -4296(4)   | 6900.9(14) | 30.3(5)        |
| C15  | 4258.7(11) | -5555(4)   | 6870.4(14) | 33.1(5)        |
| C16  | 4584.5(11) | -4754(4)   | 6191.5(14) | 33.0(5)        |
| C17  | 4297.1(10) | -2712(4)   | 5521.3(13) | 29.1(4)        |



Table S4 Anisotropic Displacement Parameters ( $\text{\AA}^2 \times 10^3$ ) for 0062. The Anisotropic displacement factor exponent takes the form:  $-2\pi^2[h^2a^2U_{11}+2hka*b*U_{12}+\dots]$ .

| Atom | U <sub>11</sub> | U <sub>22</sub> | U <sub>33</sub> | U <sub>23</sub> | U <sub>13</sub> | U <sub>12</sub> |
|------|-----------------|-----------------|-----------------|-----------------|-----------------|-----------------|
| C11  | 33.1(3)         | 40.5(3)         | 40.8(3)         | 4.5(2)          | 13.5(2)         | 10.2(2)         |
| F1   | 29.9(6)         | 56.0(7)         | 33.0(7)         | 5.7(6)          | 20.2(5)         | 7.4(6)          |
| N1   | 27.1(8)         | 29.2(8)         | 20.9(8)         | 2.6(6)          | 14.2(7)         | 2.7(7)          |
| N2   | 25.2(8)         | 25.7(8)         | 21.7(8)         | 1.3(6)          | 10.0(7)         | -1.3(7)         |
| N3   | 22.5(8)         | 26.7(8)         | 18.7(8)         | -3.1(6)         | 9.4(6)          | -2.5(7)         |
| C1   | 25.7(10)        | 22.8(9)         | 21.6(10)        | -4.4(7)         | 9.3(8)          | -4.5(8)         |
| C2   | 26.4(10)        | 27.1(10)        | 27.4(10)        | -4.8(8)         | 7.9(8)          | -1.3(8)         |
| C3   | 34.1(11)        | 31.3(10)        | 25.0(10)        | 4.2(8)          | 8.4(9)          | 0.0(9)          |
| C4   | 34.0(11)        | 29.7(10)        | 22.2(10)        | 0.0(8)          | 11.0(8)         | -5.3(9)         |
| C5   | 25.5(10)        | 24.2(9)         | 20.0(9)         | -5.3(8)         | 9.7(8)          | -6.4(8)         |
| C6   | 24.0(9)         | 20.3(9)         | 18.9(9)         | -4.0(7)         | 7.0(7)          | -5.3(8)         |
| C7   | 30.1(10)        | 32.5(10)        | 29.7(11)        | 1.1(9)          | 16.2(9)         | 2.5(9)          |
| C8   | 30.3(11)        | 34.0(11)        | 27.6(10)        | 0.3(8)          | 18.9(9)         | 1.6(9)          |
| C9   | 21.8(9)         | 23.7(9)         | 18.7(9)         | -5.8(7)         | 8.6(7)          | -5.3(8)         |
| C10  | 23.6(10)        | 32.5(10)        | 22.0(10)        | -5.4(8)         | 12.4(8)         | -3.8(8)         |
| C11  | 29.0(10)        | 32.9(10)        | 18.3(9)         | -2.0(8)         | 13.9(8)         | -6.8(9)         |
| C12  | 24.6(10)        | 25.0(9)         | 19.5(9)         | -6.2(8)         | 4.7(7)          | -3.0(8)         |
| C13  | 23.9(10)        | 24.4(9)         | 23.0(10)        | -5.5(8)         | 6.1(8)          | -2.8(8)         |
| C14  | 32.0(11)        | 31.3(11)        | 26.4(11)        | -0.2(8)         | 6.6(8)          | -3.2(9)         |
| C15  | 32.0(11)        | 30.6(10)        | 30.5(11)        | -1.6(9)         | -0.9(9)         | 0.7(9)          |
| C16  | 26.0(10)        | 35.1(11)        | 36.1(12)        | -9.2(9)         | 6.0(9)          | 2.0(9)          |
| C17  | 27.1(10)        | 34.3(10)        | 26.4(10)        | -7.7(8)         | 8.4(8)          | -2.5(9)         |

Table S5 Bond Lengths for 0062.

| Atom | Atom | Length/ $\text{\AA}$ | Atom | Atom | Length/ $\text{\AA}$ |
|------|------|----------------------|------|------|----------------------|
| C11  | C2   | 1.7430(19)           | C2   | C3   | 1.383(3)             |
| F1   | C10  | 1.348(2)             | C3   | C4   | 1.385(3)             |
| N1   | C6   | 1.402(2)             | C4   | C5   | 1.398(3)             |
| N1   | C8   | 1.472(2)             | C5   | C6   | 1.400(2)             |
| N1   | C9   | 1.362(2)             | C5   | C11  | 1.455(3)             |
| N2   | C9   | 1.302(2)             | C7   | C8   | 1.528(3)             |
| N2   | C13  | 1.395(2)             | C10  | C11  | 1.316(3)             |
| N3   | C9   | 1.400(2)             | C12  | C13  | 1.402(3)             |
| N3   | C10  | 1.398(2)             | C12  | C17  | 1.388(3)             |
| N3   | C12  | 1.419(2)             | C13  | C14  | 1.380(3)             |
| C1   | C2   | 1.379(3)             | C14  | C15  | 1.383(3)             |

| Atom | Atom | Length/Å | Atom | Atom | Length/Å |
|------|------|----------|------|------|----------|
| C1   | C6   | 1.387(3) | C15  | C16  | 1.389(3) |
| C1   | C7   | 1.501(2) | C16  | C17  | 1.383(3) |

Table S6 Bond Angles for 0062.

| Atom | Atom | Atom | Angle/°    | Atom | Atom | Atom | Angle/°    |
|------|------|------|------------|------|------|------|------------|
| C6   | N1   | C8   | 110.78(14) | C5   | C6   | N1   | 128.44(17) |
| C9   | N1   | C6   | 132.12(15) | C1   | C7   | C8   | 103.97(14) |
| C9   | N1   | C8   | 117.04(15) | N1   | C8   | C7   | 105.11(14) |
| C9   | N2   | C13  | 105.33(15) | N1   | C9   | N3   | 125.56(16) |
| C9   | N3   | C12  | 105.42(14) | N2   | C9   | N1   | 120.83(16) |
| C10  | N3   | C9   | 127.75(15) | N2   | C9   | N3   | 113.60(15) |
| C10  | N3   | C12  | 126.82(15) | F1   | C10  | N3   | 109.32(15) |
| C2   | C1   | C6   | 119.45(16) | C11  | C10  | F1   | 118.60(16) |
| C2   | C1   | C7   | 129.92(17) | C11  | C10  | N3   | 132.09(17) |
| C6   | C1   | C7   | 110.62(16) | C10  | C11  | C5   | 128.83(16) |
| C1   | C2   | C11  | 119.19(14) | C13  | C12  | N3   | 104.61(15) |
| C1   | C2   | C3   | 120.77(18) | C17  | C12  | N3   | 134.19(17) |
| C3   | C2   | C11  | 120.03(15) | C17  | C12  | C13  | 121.20(17) |
| C2   | C3   | C4   | 118.53(18) | N2   | C13  | C12  | 111.05(16) |
| C3   | C4   | C5   | 123.16(17) | C14  | C13  | N2   | 128.17(17) |
| C4   | C5   | C6   | 115.91(17) | C14  | C13  | C12  | 120.78(17) |
| C4   | C5   | C11  | 119.36(16) | C13  | C14  | C15  | 118.37(19) |
| C6   | C5   | C11  | 124.70(17) | C14  | C15  | C16  | 120.43(19) |
| C1   | C6   | N1   | 109.38(15) | C17  | C16  | C15  | 122.20(19) |
| C1   | C6   | C5   | 122.17(17) | C16  | C17  | C12  | 117.02(18) |

Table S7 Torsion Angles for 0062.

| A   | B   | C   | D   | Angle/°     | A  | B  | C   | D   | Angle/°     |
|-----|-----|-----|-----|-------------|----|----|-----|-----|-------------|
| C11 | C2  | C3  | C4  | -178.06(14) | C8 | N1 | C9  | N2  | 4.2(2)      |
| F1  | C10 | C11 | C5  | -177.37(16) | C8 | N1 | C9  | N3  | -174.35(16) |
| N2  | C13 | C14 | C15 | -179.85(17) | C9 | N1 | C6  | C1  | 174.85(17)  |
| N3  | C10 | C11 | C5  | 2.8(3)      | C9 | N1 | C6  | C5  | -5.3(3)     |
| N3  | C12 | C13 | N2  | -0.23(19)   | C9 | N1 | C8  | C7  | -174.04(15) |
| N3  | C12 | C13 | C14 | 179.81(16)  | C9 | N2 | C13 | C12 | 0.0(2)      |
| N3  | C12 | C17 | C16 | 179.99(18)  | C9 | N2 | C13 | C14 | 179.94(18)  |
| C1  | C2  | C3  | C4  | 1.0(3)      | C9 | N3 | C10 | F1  | 176.04(15)  |
| C1  | C7  | C8  | N1  | -3.37(19)   | C9 | N3 | C10 | C11 | -4.1(3)     |
| C2  | C1  | C6  | N1  | -179.30(15) | C9 | N3 | C12 | C13 | 0.37(18)    |

| A  | B  | C   | D   | Angle/°     | A   | B   | C   | D   | Angle/°     |
|----|----|-----|-----|-------------|-----|-----|-----|-----|-------------|
| C2 | C1 | C6  | C5  | 0.8(3)      | C9  | N3  | C12 | C17 | -179.22(19) |
| C2 | C1 | C7  | C8  | -178.63(18) | C10 | N3  | C9  | N1  | -2.7(3)     |
| C2 | C3 | C4  | C5  | -0.7(3)     | C10 | N3  | C9  | N2  | 178.67(16)  |
| C3 | C4 | C5  | C6  | 0.4(3)      | C10 | N3  | C12 | C13 | -178.73(16) |
| C3 | C4 | C5  | C11 | -177.79(17) | C10 | N3  | C12 | C17 | 1.7(3)      |
| C4 | C5 | C6  | N1  | 179.68(16)  | C11 | C5  | C6  | N1  | -2.2(3)     |
| C4 | C5 | C6  | C1  | -0.5(3)     | C11 | C5  | C6  | C1  | 177.61(16)  |
| C4 | C5 | C11 | C10 | -179.18(19) | C12 | N3  | C9  | N1  | 178.24(16)  |
| C6 | N1 | C8  | C7  | 3.6(2)      | C12 | N3  | C9  | N2  | -0.42(19)   |
| C6 | N1 | C9  | N2  | -172.80(17) | C12 | N3  | C10 | F1  | -5.1(2)     |
| C6 | N1 | C9  | N3  | 8.6(3)      | C12 | N3  | C10 | C11 | 174.77(19)  |
| C6 | C1 | C2  | C11 | 177.99(13)  | C12 | C13 | C14 | C15 | 0.1(3)      |
| C6 | C1 | C2  | C3  | -1.1(3)     | C13 | N2  | C9  | N1  | -178.45(15) |
| C6 | C1 | C7  | C8  | 2.2(2)      | C13 | N2  | C9  | N3  | 0.27(19)    |
| C6 | C5 | C11 | C10 | 2.8(3)      | C13 | C12 | C17 | C16 | 0.5(3)      |
| C7 | C1 | C2  | C11 | -1.1(3)     | C13 | C14 | C15 | C16 | 0.4(3)      |
| C7 | C1 | C2  | C3  | 179.80(19)  | C14 | C15 | C16 | C17 | -0.4(3)     |
| C7 | C1 | C6  | N1  | 0.0(2)      | C15 | C16 | C17 | C12 | 0.0(3)      |
| C7 | C1 | C6  | C5  | -179.90(16) | C17 | C12 | C13 | N2  | 179.42(15)  |
| C8 | N1 | C6  | C1  | -2.3(2)     | C17 | C12 | C13 | C14 | -0.5(3)     |
| C8 | N1 | C6  | C5  | 177.54(17)  |     |     |     |     |             |

Table S8 Hydrogen Atom Coordinates ( $\text{\AA} \times 10^4$ ) and Isotropic Displacement Parameters ( $\text{\AA}^2 \times 10^3$ ) for 0062.

| Atom | x       | y        | z       | U(eq) |
|------|---------|----------|---------|-------|
| H3   | 1028.73 | 9601.89  | 2438.84 | 36    |
| H4   | 2080.16 | 7380.45  | 2461.04 | 34    |
| H7A  | 560.46  | 3995.7   | 4977.53 | 35    |
| H7B  | 967.07  | 6585.45  | 5565.96 | 35    |
| H8A  | 1847.01 | 3763.09  | 6337.85 | 34    |
| H8B  | 1417.5  | 1150.92  | 5795.86 | 34    |
| H11  | 3070.06 | 4464     | 3142.33 | 30    |
| H14  | 3409.06 | -4815.57 | 7356.01 | 36    |
| H15  | 4466.03 | -6946.14 | 7307.28 | 40    |
| H16  | 5009.93 | -5620.98 | 6187.47 | 40    |
| H17  | 4519.59 | -2192.32 | 5069.73 | 35    |

**Compound 4a (CCDC 2213793):**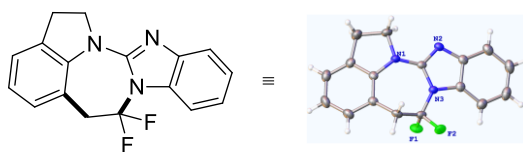

**Experimental:** A suitable crystal was selected and on a SuperNova, Dual, Cu at zero, AtlasS2 diffractometer. The crystal was kept at 150.00(10) K during data collection.

**Crystal Data** for  $C_{17}H_{13}F_2N_3$  ( $M = 297.30$  g/mol): monoclinic, space group  $P2_1/c$  (no. 14),  $a = 11.6045(10)$  Å,  $b = 8.9631(8)$  Å,  $c = 13.1233(10)$  Å,  $\beta = 99.803(7)^\circ$ ,  $V = 1345.1(2)$  Å<sup>3</sup>,  $Z = 4$ ,  $T = 150.00(10)$  K,  $\mu(\text{Mo K}\alpha) = 0.109$  mm<sup>-1</sup>,  $D_{\text{calc}} = 1.468$  g/cm<sup>3</sup>, 5944 reflections measured ( $5.53^\circ \leq 2\theta \leq 49.998^\circ$ ), 2370 unique ( $R_{\text{int}} = 0.0230$ ,  $R_{\text{sigma}} = 0.0322$ ) which were used in all calculations. The final  $R_1$  was 0.0387 ( $I > 2\sigma(I)$ ) and  $wR_2$  was 0.0936 (all data).

Table S9 Crystal data and structure refinement for exp\_2968.

|                                               |                                                             |
|-----------------------------------------------|-------------------------------------------------------------|
| Identification code                           | exp_2968                                                    |
| Empirical formula                             | $C_{17}H_{13}F_2N_3$                                        |
| Formula weight                                | 297.30                                                      |
| Temperature/K                                 | 150.00(10)                                                  |
| Crystal system                                | monoclinic                                                  |
| Space group                                   | $P2_1/c$                                                    |
| $a/\text{Å}$                                  | 11.6045(10)                                                 |
| $b/\text{Å}$                                  | 8.9631(8)                                                   |
| $c/\text{Å}$                                  | 13.1233(10)                                                 |
| $\alpha/^\circ$                               | 90                                                          |
| $\beta/^\circ$                                | 99.803(7)                                                   |
| $\gamma/^\circ$                               | 90                                                          |
| Volume/Å <sup>3</sup>                         | 1345.1(2)                                                   |
| $Z$                                           | 4                                                           |
| $\rho_{\text{calc}}/\text{cm}^3$              | 1.468                                                       |
| $\mu/\text{mm}^{-1}$                          | 0.109                                                       |
| $F(000)$                                      | 616.0                                                       |
| Crystal size/mm <sup>3</sup>                  | 0.12 × 0.11 × 0.09                                          |
| Radiation                                     | Mo K $\alpha$ ( $\lambda = 0.71073$ )                       |
| $2\theta$ range for data collection/ $^\circ$ | 5.53 to 49.998                                              |
| Index ranges                                  | $-13 \leq h \leq 13, -10 \leq k \leq 9, -15 \leq l \leq 15$ |

|                                                |                                                                  |
|------------------------------------------------|------------------------------------------------------------------|
| Reflections collected                          | 5944                                                             |
| Independent reflections                        | 2370 [ $R_{\text{int}} = 0.0230$ , $R_{\text{sigma}} = 0.0322$ ] |
| Data/restraints/parameters                     | 2370/0/199                                                       |
| Goodness-of-fit on $F^2$                       | 1.070                                                            |
| Final R indexes [ $I \geq 2\sigma(I)$ ]        | $R_1 = 0.0387$ , $wR_2 = 0.0886$                                 |
| Final R indexes [all data]                     | $R_1 = 0.0455$ , $wR_2 = 0.0936$                                 |
| Largest diff. peak/hole / $e \text{ \AA}^{-3}$ | 0.16/-0.23                                                       |

*Table S10* Fractional Atomic Coordinates ( $\times 10^4$ ) and Equivalent Isotropic Displacement Parameters ( $\text{\AA}^2 \times 10^3$ ) for exp\_2968.  $U_{\text{eq}}$  is defined as 1/3 of of the trace of the orthogonalised  $U_{\text{ij}}$  tensor.

| Atom | x          | y          | z          | U(eq)   |
|------|------------|------------|------------|---------|
| F1   | 5029.7(9)  | 5666.3(12) | 1793.6(7)  | 33.3(3) |
| F2   | 5784.2(9)  | 3671.0(11) | 2550.7(7)  | 34.1(3) |
| N1   | 3729.3(11) | 6637.7(15) | 4126.2(9)  | 21.9(3) |
| N2   | 5629.1(11) | 7106.5(15) | 4948.3(9)  | 23.0(3) |
| N3   | 5474.8(11) | 5604.9(15) | 3549.1(9)  | 20.8(3) |
| C1   | 1847.3(14) | 7147(2)    | 3347.2(12) | 26.3(4) |
| C2   | 854.0(15)  | 6969(2)    | 2609.8(13) | 32.9(4) |
| C3   | 849.0(15)  | 5893(2)    | 1849.6(14) | 34.9(5) |
| C4   | 1820.4(15) | 5005(2)    | 1839.4(12) | 30.5(4) |
| C5   | 2833.0(14) | 5157.6(19) | 2575.5(11) | 23.3(4) |
| C6   | 2826.0(14) | 6268.8(18) | 3311.6(11) | 20.9(4) |
| C7   | 3828.6(14) | 4095.1(19) | 2607.8(12) | 25.3(4) |
| C8   | 5004.0(14) | 4783.5(19) | 2638.3(11) | 23.2(4) |
| C9   | 4904.9(13) | 6450.6(17) | 4208.8(11) | 19.4(3) |
| C10  | 6736.9(14) | 6725.0(19) | 4778.2(12) | 23.6(4) |
| C11  | 7817.1(15) | 7135(2)    | 5339.3(13) | 31.4(4) |
| C12  | 8814.1(16) | 6639(2)    | 5005.7(14) | 36.4(5) |
| C13  | 8743.7(15) | 5756(2)    | 4126.3(15) | 36.5(5) |
| C14  | 7681.8(15) | 5321(2)    | 3559.9(13) | 31.3(4) |
| C15  | 6680.4(14) | 5813.2(19) | 3906.5(12) | 23.4(4) |
| C16  | 3327.3(15) | 7839(2)    | 4769.3(12) | 27.8(4) |
| C17  | 2071.1(15) | 8160(2)    | 4269.8(14) | 38.3(5) |

*Table S11* Anisotropic Displacement Parameters ( $\text{\AA}^2 \times 10^3$ ) for exp\_2968. The Anisotropic displacement factor exponent takes the form:

$$-2\pi^2[h^2a^*{}^2U_{11}+2hka^*b^*U_{12}+\dots].$$

| Atom | U <sub>11</sub> | U <sub>22</sub> | U <sub>33</sub> | U <sub>23</sub> | U <sub>13</sub> | U <sub>12</sub> |
|------|-----------------|-----------------|-----------------|-----------------|-----------------|-----------------|
| F1   | 48.6(6)         | 32.9(6)         | 19.2(5)         | 3.6(4)          | 8.0(4)          | -2.9(5)         |
| F2   | 38.3(6)         | 27.1(6)         | 37.4(6)         | -9.9(4)         | 7.9(4)          | 8.5(5)          |
| N1   | 26.0(7)         | 21.0(8)         | 18.7(7)         | -3.1(5)         | 4.2(5)          | 1.6(6)          |
| N2   | 28.2(7)         | 21.8(8)         | 18.4(6)         | -0.1(6)         | 2.0(5)          | 0.2(6)          |
| N3   | 24.7(7)         | 19.1(8)         | 18.7(6)         | -1.1(5)         | 4.0(5)          | 2.0(6)          |
| C1   | 26.0(9)         | 26.1(10)        | 28.4(9)         | 2.4(7)          | 9.2(7)          | -0.2(8)         |
| C2   | 25.5(9)         | 35.7(12)        | 38.0(10)        | 7.2(8)          | 6.4(7)          | 3.4(8)          |
| C3   | 27.6(9)         | 41.2(12)        | 33.0(10)        | 3.3(8)          | -3.6(7)         | -6.7(9)         |
| C4   | 34.7(10)        | 29.0(10)        | 26.1(9)         | -1.7(8)         | 0.3(7)          | -6.3(8)         |
| C5   | 29.0(9)         | 20.1(9)         | 21.1(8)         | 1.7(7)          | 5.0(6)          | -3.0(7)         |
| C6   | 24.2(8)         | 20.0(9)         | 19.1(8)         | 4.4(6)          | 5.5(6)          | -2.4(7)         |
| C7   | 35.2(9)         | 20.1(9)         | 19.7(8)         | -4.0(7)         | 2.0(7)          | -1.9(8)         |
| C8   | 33.9(9)         | 18.4(9)         | 17.8(8)         | 1.2(6)          | 5.8(6)          | 7.1(7)          |
| C9   | 27.3(8)         | 15.0(9)         | 16.2(7)         | 2.3(6)          | 4.8(6)          | 0.9(7)          |
| C10  | 28.7(9)         | 19.2(9)         | 22.2(8)         | 5.8(7)          | 2.2(6)          | -0.3(7)         |
| C11  | 34.4(10)        | 28.1(10)        | 28.9(9)         | 4.7(8)          | -2.3(7)         | -2.8(8)         |
| C12  | 27.4(9)         | 34.0(11)        | 44.7(11)        | 11.6(9)         | -2.5(8)         | -2.5(9)         |
| C13  | 26.1(9)         | 36.4(12)        | 48.1(11)        | 13.0(9)         | 9.2(8)          | 5.7(8)          |
| C14  | 32.3(10)        | 29.7(11)        | 32.9(9)         | 4.7(8)          | 8.8(7)          | 5.1(8)          |
| C15  | 26.7(9)         | 19.1(9)         | 24.2(8)         | 6.5(7)          | 3.6(6)          | 1.0(7)          |
| C16  | 34.7(9)         | 24.6(10)        | 25.0(8)         | -5.0(7)         | 8.0(7)          | 4.6(8)          |
| C17  | 33.3(10)        | 41.6(12)        | 40.7(10)        | -9.4(9)         | 8.4(8)          | 8.4(9)          |

Table S12 Bond Lengths for exp\_2968.

| Atom | Atom | Length/Å   | Atom | Atom | Length/Å |
|------|------|------------|------|------|----------|
| F1   | C8   | 1.3664(18) | C2   | C3   | 1.386(3) |
| F2   | C8   | 1.3648(19) | C3   | C4   | 1.382(3) |
| N1   | C6   | 1.403(2)   | C4   | C5   | 1.395(2) |
| N1   | C9   | 1.360(2)   | C5   | C6   | 1.388(2) |
| N1   | C16  | 1.491(2)   | C5   | C7   | 1.492(2) |
| N2   | C9   | 1.310(2)   | C7   | C8   | 1.491(2) |
| N2   | C10  | 1.385(2)   | C10  | C11  | 1.391(2) |
| N3   | C8   | 1.431(2)   | C10  | C15  | 1.398(2) |
| N3   | C9   | 1.3988(19) | C11  | C12  | 1.379(3) |
| N3   | C15  | 1.410(2)   | C12  | C13  | 1.390(3) |
| C1   | C2   | 1.382(2)   | C13  | C14  | 1.382(3) |
| C1   | C6   | 1.389(2)   | C14  | C15  | 1.390(2) |

| Atom | Atom | Length/Å | Atom | Atom | Length/Å |
|------|------|----------|------|------|----------|
| C1   | C17  | 1.501(2) | C16  | C17  | 1.521(2) |

Table S13 Bond Angles for exp\_2968.

| Atom | Atom | Atom | Angle/°    | Atom | Atom | Atom | Angle/°    |
|------|------|------|------------|------|------|------|------------|
| C6   | N1   | C16  | 109.65(13) | F1   | C8   | C7   | 111.35(13) |
| C9   | N1   | C6   | 129.83(13) | F2   | C8   | F1   | 104.38(11) |
| C9   | N1   | C16  | 116.75(13) | F2   | C8   | N3   | 106.37(12) |
| C9   | N2   | C10  | 105.42(13) | F2   | C8   | C7   | 108.20(14) |
| C9   | N3   | C8   | 129.97(13) | N3   | C8   | C7   | 116.92(13) |
| C9   | N3   | C15  | 105.62(12) | N1   | C9   | N3   | 126.22(14) |
| C15  | N3   | C8   | 124.20(13) | N2   | C9   | N1   | 120.79(14) |
| C2   | C1   | C6   | 120.02(16) | N2   | C9   | N3   | 112.98(13) |
| C2   | C1   | C17  | 130.08(16) | N2   | C10  | C11  | 128.85(15) |
| C6   | C1   | C17  | 109.87(14) | N2   | C10  | C15  | 111.14(14) |
| C1   | C2   | C3   | 119.00(17) | C11  | C10  | C15  | 120.01(15) |
| C4   | C3   | C2   | 120.26(16) | C12  | C11  | C10  | 118.43(17) |
| C3   | C4   | C5   | 121.94(17) | C11  | C12  | C13  | 120.89(17) |
| C4   | C5   | C7   | 120.93(15) | C14  | C13  | C12  | 121.87(17) |
| C6   | C5   | C4   | 116.62(16) | C13  | C14  | C15  | 116.92(17) |
| C6   | C5   | C7   | 122.29(14) | C10  | C15  | N3   | 104.78(13) |
| C1   | C6   | N1   | 110.48(14) | C14  | C15  | N3   | 133.35(16) |
| C5   | C6   | N1   | 127.37(15) | C14  | C15  | C10  | 121.87(16) |
| C5   | C6   | C1   | 122.10(15) | N1   | C16  | C17  | 105.20(13) |
| C8   | C7   | C5   | 115.90(14) | C1   | C17  | C16  | 104.75(14) |
| F1   | C8   | N3   | 108.77(13) |      |      |      |            |

Table S14 Torsion Angles for exp\_2968.

| A  | B   | C   | D   | Angle/°     | A   | B  | C   | D   | Angle/°     |
|----|-----|-----|-----|-------------|-----|----|-----|-----|-------------|
| N1 | C16 | C17 | C1  | -1.70(19)   | C9  | N1 | C16 | C17 | 160.93(14)  |
| N2 | C10 | C11 | C12 | -178.60(16) | C9  | N2 | C10 | C11 | 179.68(17)  |
| N2 | C10 | C15 | N3  | -1.51(18)   | C9  | N2 | C10 | C15 | 0.18(18)    |
| N2 | C10 | C15 | C14 | 178.02(15)  | C9  | N3 | C8  | F1  | 94.70(18)   |
| C1 | C2  | C3  | C4  | 0.7(3)      | C9  | N3 | C8  | F2  | -153.38(14) |
| C2 | C1  | C6  | N1  | 179.79(15)  | C9  | N3 | C8  | C7  | -32.4(2)    |
| C2 | C1  | C6  | C5  | -2.6(2)     | C9  | N3 | C15 | C10 | 2.16(16)    |
| C2 | C1  | C17 | C16 | -179.73(18) | C9  | N3 | C15 | C14 | -177.29(18) |
| C2 | C3  | C4  | C5  | -0.5(3)     | C10 | N2 | C9  | N1  | -177.79(14) |

| A  | B  | C   | D   | Angle/°     | A   | B   | C   | D   | Angle/°     |
|----|----|-----|-----|-------------|-----|-----|-----|-----|-------------|
| C3 | C4 | C5  | C6  | -1.1(2)     | C10 | N2  | C9  | N3  | 1.31(18)    |
| C3 | C4 | C5  | C7  | 174.29(16)  | C10 | C11 | C12 | C13 | 0.3(3)      |
| C4 | C5 | C6  | N1  | 179.87(15)  | C11 | C10 | C15 | N3  | 178.94(15)  |
| C4 | C5 | C6  | C1  | 2.7(2)      | C11 | C10 | C15 | C14 | -1.5(2)     |
| C4 | C5 | C7  | C8  | 129.74(16)  | C11 | C12 | C13 | C14 | -1.0(3)     |
| C5 | C7 | C8  | F1  | -59.29(17)  | C12 | C13 | C14 | C15 | 0.3(3)      |
| C5 | C7 | C8  | F2  | -173.43(12) | C13 | C14 | C15 | N3  | -179.71(17) |
| C5 | C7 | C8  | N3  | 66.59(19)   | C13 | C14 | C15 | C10 | 0.9(2)      |
| C6 | N1 | C9  | N2  | 167.48(15)  | C15 | N3  | C8  | F1  | -79.31(18)  |
| C6 | N1 | C9  | N3  | -11.5(3)    | C15 | N3  | C8  | F2  | 32.60(19)   |
| C6 | N1 | C16 | C17 | 0.62(18)    | C15 | N3  | C8  | C7  | 153.54(15)  |
| C6 | C1 | C2  | C3  | 0.8(3)      | C15 | N3  | C9  | N1  | 176.78(15)  |
| C6 | C1 | C17 | C16 | 2.3(2)      | C15 | N3  | C9  | N2  | -2.26(17)   |
| C6 | C5 | C7  | C8  | -55.1(2)    | C15 | C10 | C11 | C12 | 0.9(2)      |
| C7 | C5 | C6  | N1  | 4.5(3)      | C16 | N1  | C6  | C1  | 0.84(18)    |
| C7 | C5 | C6  | C1  | -172.64(15) | C16 | N1  | C6  | C5  | -176.59(15) |
| C8 | N3 | C9  | N1  | 1.9(3)      | C16 | N1  | C9  | N2  | 11.9(2)     |
| C8 | N3 | C9  | N2  | -177.12(14) | C16 | N1  | C9  | N3  | -167.08(14) |
| C8 | N3 | C15 | C10 | 177.40(14)  | C17 | C1  | C2  | C3  | -176.97(18) |
| C8 | N3 | C15 | C14 | -2.0(3)     | C17 | C1  | C6  | N1  | -2.00(19)   |
| C9 | N1 | C6  | C1  | -156.09(16) | C17 | C1  | C6  | C5  | 175.59(15)  |
| C9 | N1 | C6  | C5  | 26.5(3)     |     |     |     |     |             |

Table S15 Hydrogen Atom Coordinates ( $\text{\AA} \times 10^4$ ) and Isotropic Displacement Parameters ( $\text{\AA}^2 \times 10^3$ ) for exp\_2968.

| Atom | x       | y       | z       | U(eq) |
|------|---------|---------|---------|-------|
| H2   | 198.95  | 7561.14 | 2623.49 | 40    |
| H3   | 189.44  | 5769.48 | 1344.41 | 42    |
| H4   | 1798.29 | 4284.09 | 1326.75 | 37    |
| H7A  | 3858.19 | 3465.19 | 3212.72 | 30    |
| H7B  | 3668.14 | 3455.13 | 2004.24 | 30    |
| H11  | 7865.7  | 7730.05 | 5925.61 | 38    |
| H12  | 9543.58 | 6897.91 | 5373.93 | 44    |
| H13  | 9430.41 | 5448.99 | 3913.08 | 44    |
| H14  | 7639.35 | 4725.85 | 2974.03 | 38    |
| H16A | 3808.02 | 8723.93 | 4767.34 | 33    |
| H16B | 3363.89 | 7506.47 | 5477.46 | 33    |
| H17A | 1537.46 | 7943.13 | 4744.56 | 46    |



| <b>Atom</b> | <b>x</b> | <b>y</b> | <b>z</b> | <b>U(eq)</b> |
|-------------|----------|----------|----------|--------------|
| H17B        | 1978.99  | 9196.99  | 4059.65  | 46           |

## V. General Procedure for the Biological Evaluation

### Cell culture:

Human cancer cells MCF-7, A549, HepG2, BEAS-2B were purchased from American Type Culture Collection (ATCC, Shanghai, China). MCF-7, HepG2 and BEAS-2B cells were cultured with Dulbecco's Modified Eagle Medium cell culture medium (DMEM, Gibco, USA) supplemented with 10% FBS (Gibco, USA). A549 cells were cultured with RPMI-1640 medium (Gibco, USA) supplemented with 10% FBS. All of them were cultured in 5% CO<sub>2</sub> at 37 °C in an incubator (Thermo Scientific, USA).

### *In Vitro* Cytotoxicity Assay:

Cells were plated in 96-well microtiter plates at a density of 5×10<sup>3</sup>/well and incubated in a humidified atmosphere with 5% CO<sub>2</sub> at 37 °C for 24 h. The tested compound was added into triplicate wells with same concentration (10 μM) and 0.5% DMSO for the control. After they had been incubated for 48 h, 10 μL of CCK8 (Cell Counting Kit-8) solution was added into each well, and the plate was incubated for an additional 1 h. The absorbance (OD) was read on a microplate reader at 450 nm to measure the cell viability (%). All experiments were performed for three times.

*Table S16* Cell viability measured by treating with 10 μM of the tested compounds

| <b>Compounds</b> | <b>Cell Viability (%) (mean ± SEM, n = 3)</b> |           |           |           |
|------------------|-----------------------------------------------|-----------|-----------|-----------|
|                  | MCF-7                                         | A549      | HepG2     | BEAS-2B   |
| <b>DMSO</b>      | 96.5±0.32                                     | 94.6±0.42 | 94.6±0.34 | 98.0±1.16 |

|            |           |           |           |            |
|------------|-----------|-----------|-----------|------------|
| <b>3a</b>  | 96.5±4.09 | 97.2±1.14 | 94.8±2.76 | 97.1±1.71  |
| <b>3b</b>  | 90.7±7.15 | 76.3±2.06 | 94.3±5.65 | 93.3±3.54  |
| <b>3c</b>  | 92.3±2.48 | 82.7±2.31 | 90.9±4.07 | 88.92±0.83 |
| <b>3d</b>  | 91.4±5.97 | 86.8±2.50 | 93.8±4.54 | 89.6±1.09  |
| <b>3g</b>  | 96.1±5.49 | 85.2±1.56 | 90.9±2.71 | 93.7±1.87  |
| <b>3j</b>  | 93.7±9.82 | 87.2±1.96 | 92.7±5.08 | 67.7±3.57  |
| <b>3k</b>  | 63.9±5.22 | 67.5±1.96 | 94.5±9.89 | 64.8±5.24  |
| <b>3l</b>  | 55.0±2.12 | 92.0±3.15 | 67.3±2.91 | 69.3±3.67  |
| <b>3m</b>  | 98.4±1.25 | 94.3±4.40 | 93.8±2.85 | 92.9±3.40  |
| <b>3n</b>  | 96.8±9.68 | 98.4±2.71 | 92.4±1.91 | 98.8±1.26  |
| <b>3n'</b> | 81.3±7.12 | 81.2±1.12 | 78.4±3.62 | 76.7±4.55  |
| <b>3o</b>  | 68.8±7.53 | 67.2±2.87 | 76.8±1.22 | 70.9±2.73  |
| <b>4a</b>  | 74.7±8.20 | 77.4±1.61 | 78.3±9.28 | 80.0±7.42  |
| <b>4b</b>  | 91.4±3.36 | 65.2±2.87 | 74.5±9.24 | 91.6±4.63  |
| <b>4c</b>  | 99.7±4.15 | 94.1±1.82 | 90.0±2.54 | 96.2±2.80  |
| <b>4e</b>  | 87.4±6.60 | 95.4±6.22 | 96.2±0.99 | 95.1±1.89  |
| <b>4f</b>  | 91.6±6.88 | 94.5±2.05 | 92.8±2.24 | 85.6±3.21  |
| <b>4g</b>  | 94.3±5.32 | 99.7±2.19 | 115.2±3.6 | 86.9±6.30  |
| <b>4h</b>  | 98.0±2.99 | 94.1±5.77 | 99.1±0.88 | 81.2±2.53  |

---

#### Colony formation assay:

MCF-7 cells in the logarithmic growth phase were plated in a 6-well plate at a density of 1000 cells per well. After 96 h, cells were incubated with DMSO (0.1%) or compound **3l** (1.25  $\mu$ M, 2.5  $\mu$ M, 5  $\mu$ M, 10  $\mu$ M or 20  $\mu$ M) for 48 h, and then were cultured in drug-free medium for 7 days. The cell colonies were fixed with 4% paraformaldehyde for 10 minutes, stained with crystal violet for 20 minutes, and then photographed. All experiments were performed for three times.

### **Flow cytometry (FCM) analysis of cell apoptosis:**

Apoptotic cell death was determined by flow cytometry analysis using Annexin V-FITC and propidium iodide (PI) assay kit (BD, PharMingen, San Diego, CA). After being cultured for 24 h, the cells were treated by different concentrations (0, 2.5, 5, 10  $\mu$ M) of compound **3I** for 18 h. MCF-7 cells were collected, washed with cold PBS, suspended in 5  $\mu$ L of Annexin V binding buffer and stained with 5  $\mu$ L of PI. The cells were mixed gently, incubated in the dark for 20 minutes, and washed. The samples were analyzed with a FACS (Beckman Coulter, USA).

### **Statistical analysis:**

All cell culture experiments were performed independently for at least three times and in triplicate each time. All the data were processed and statistically analyzed using SPSS and GraphPad software, and the data in bar graphs are presented as mean value  $\pm$  standard deviation (SD). The statistical significance (\*\*P < 0.05) was calculated by ANOVA (one-way analysis of variance).

## **VI. References**

- [S1] S. Zhao, X. Cai, Y. Lu, J. Hu, Z. Xiong, J. Jin, Y. Li, H. Wang and J.-Q. Wu, Cp\*Ir(III) and Cp\*Rh(III)-catalyzed annulation of salicylaldehydes with fluorinated vinyl tosylates, *Chem. Commun.*, 2022, **58**, 8966.
- [S2] (a) N. Martínez-Yáñez, J. Suárez, A. Cajaraville, J. A. Varela and C. Saá, Rh(III)-catalyzed [5+2] oxidative annulation of cyclic arylguanidines and alkynes to 1,3-benzodiazepines. A striking mechanistic proposal from DFT, *Org. Lett.*, 2019, **21**, 1779; (b) Y. Yang, K. Zhang, J. Yang, G. Zhu, W. Chen, C. Zhang, Z. Zhou and W. Yi, Ru(II)-catalyzed and acidity-controlled tunable [5+1]/[5+2] annulation for building ring-fused quinazolines and 1,3-benzodiazepines, *Chem. Commun.*, 2020, **56**, 11315.

## VII. Copies of NMR Spectra

$^1\text{H}$ -NMR of **1d** (DMSO- $d_6$ , 400 MHz)

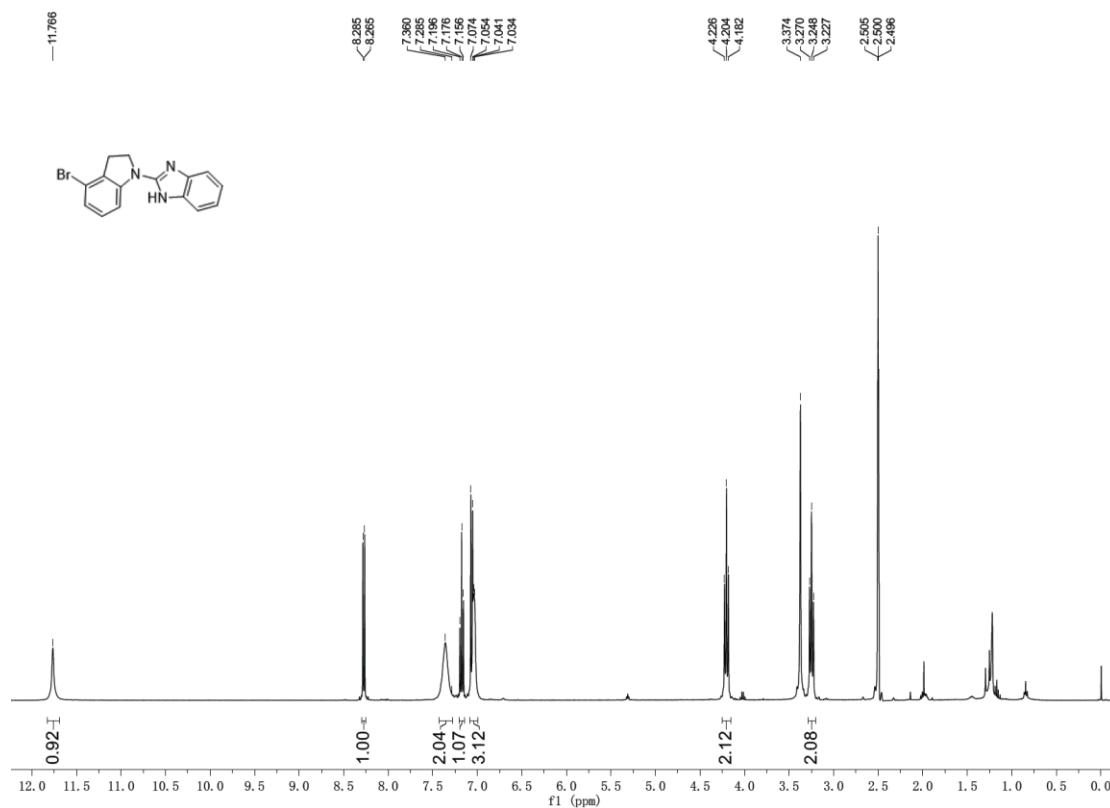

$^{13}\text{C}\{^1\text{H}\}$ -NMR of **1d** (DMSO- $d_6$ , 100 MHz)

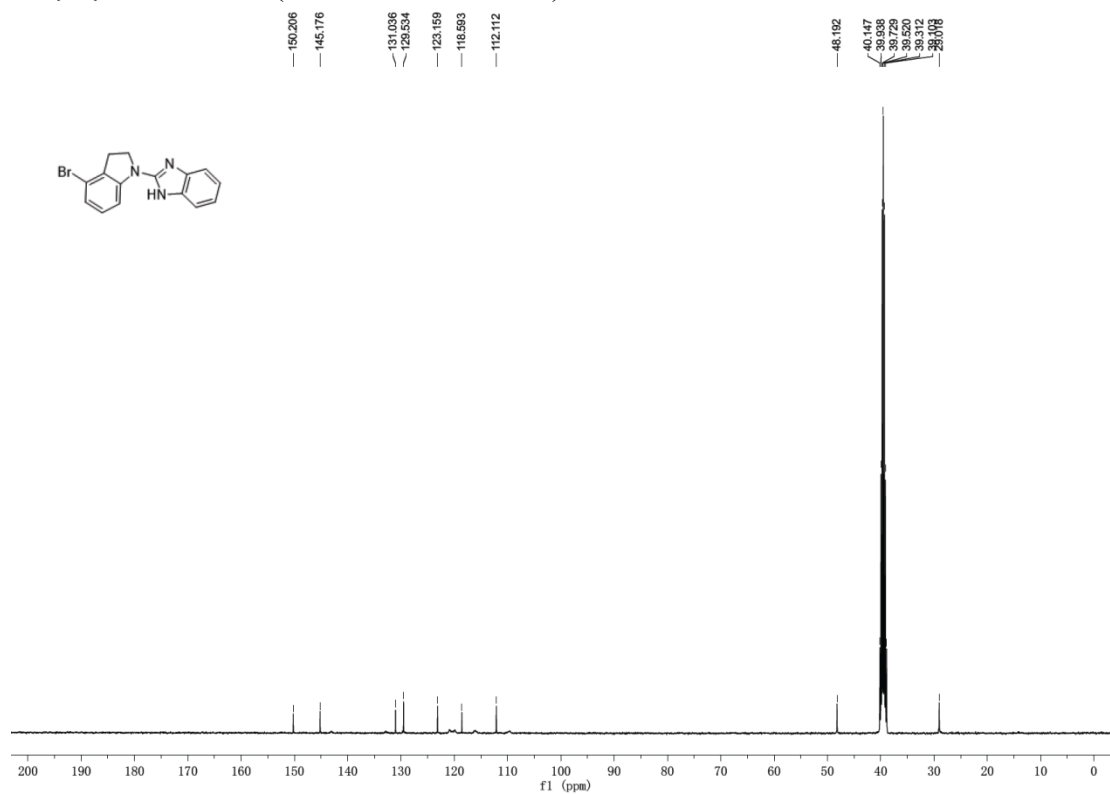

$^1\text{H-NMR}$  of **1n** ( $\text{DMSO-}d_6$ , 400 MHz)

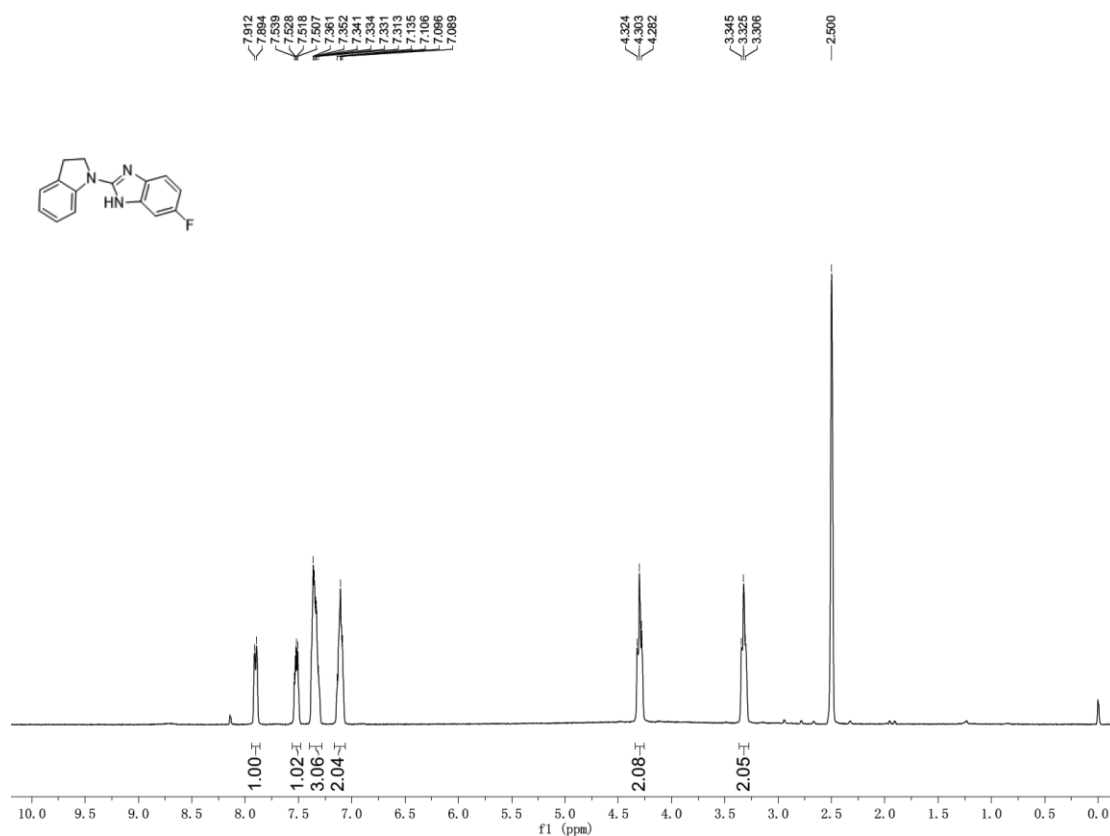

$^{13}\text{C}\{^1\text{H}\}$ -NMR of **1n** ( $\text{DMSO-}d_6$ , 100 MHz)

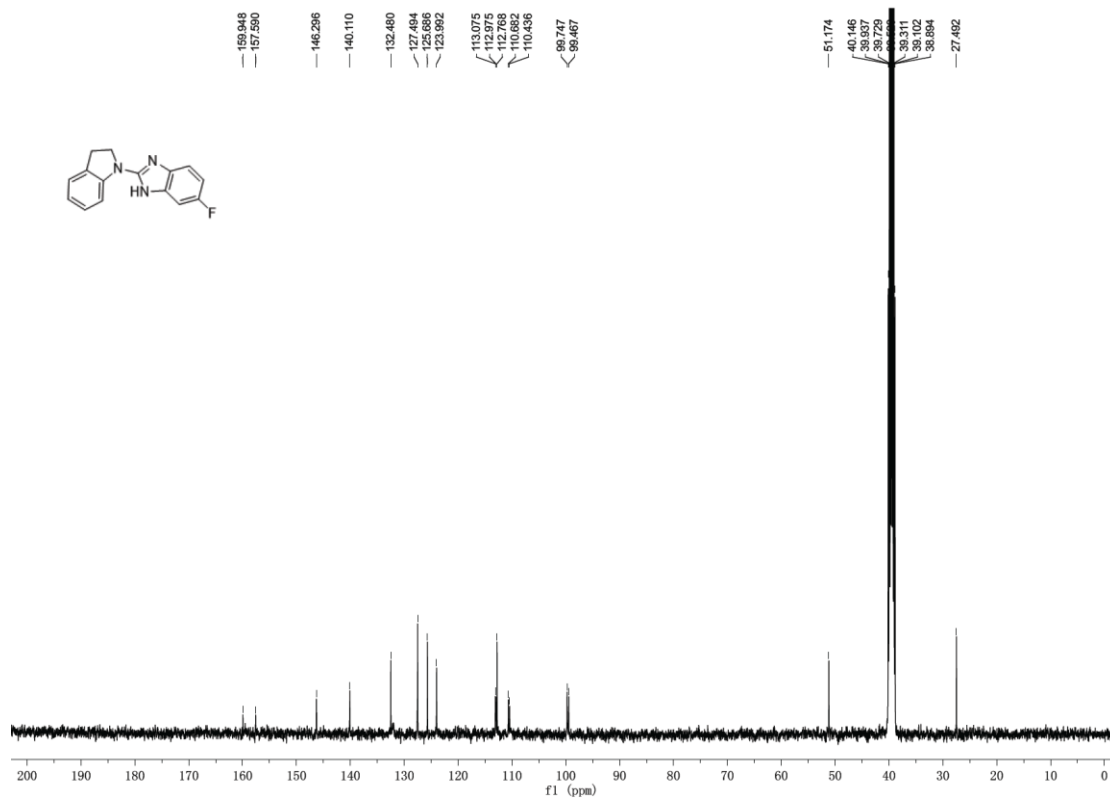

$^{19}\text{F}$ -NMR of **1n** (DMSO- $d_6$ , 376 MHz)

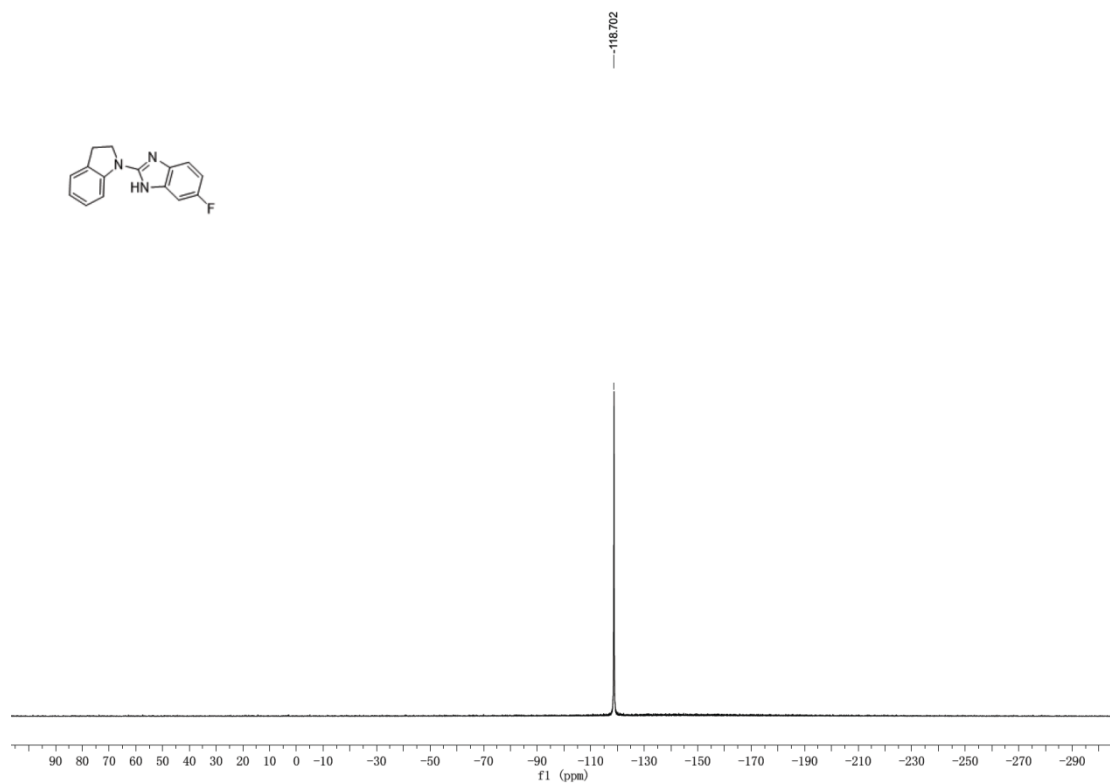

$^1\text{H-NMR}$  of **3a** ( $\text{CDCl}_3$ , 400 MHz)

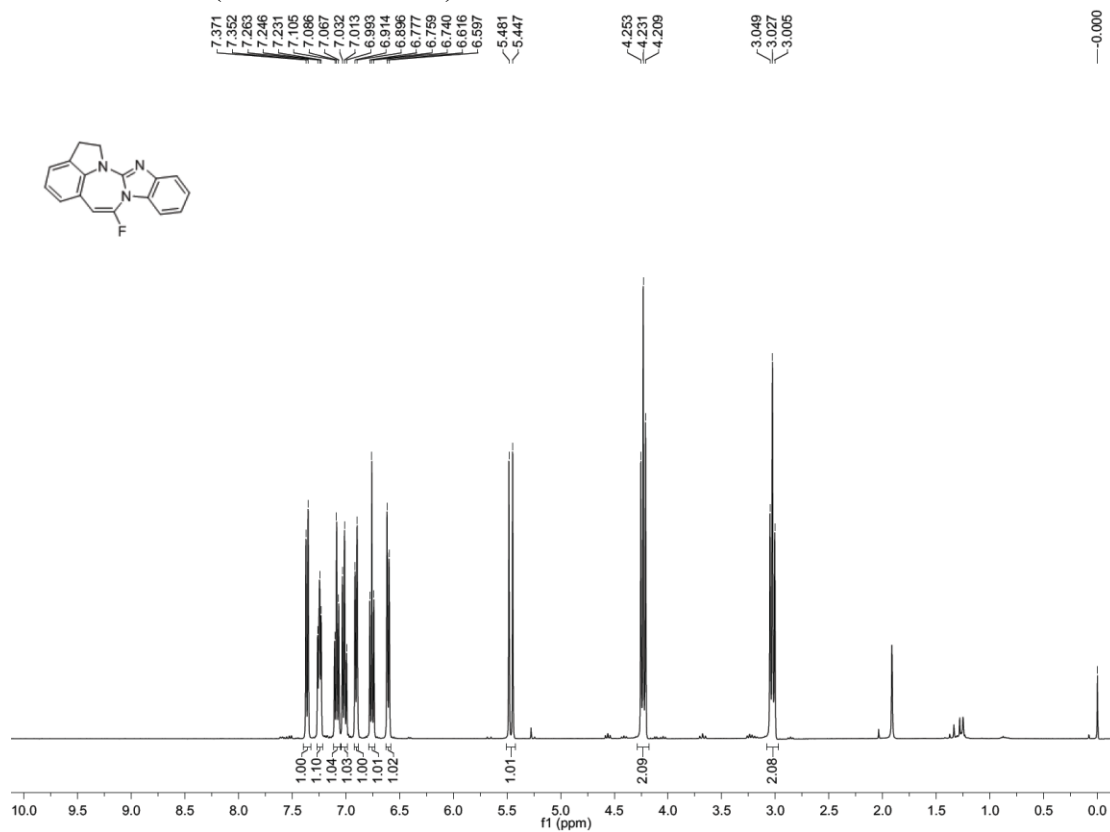

$^{13}\text{C}\{^1\text{H}\}$ -NMR of **3a** ( $\text{CDCl}_3$ , 100 MHz)

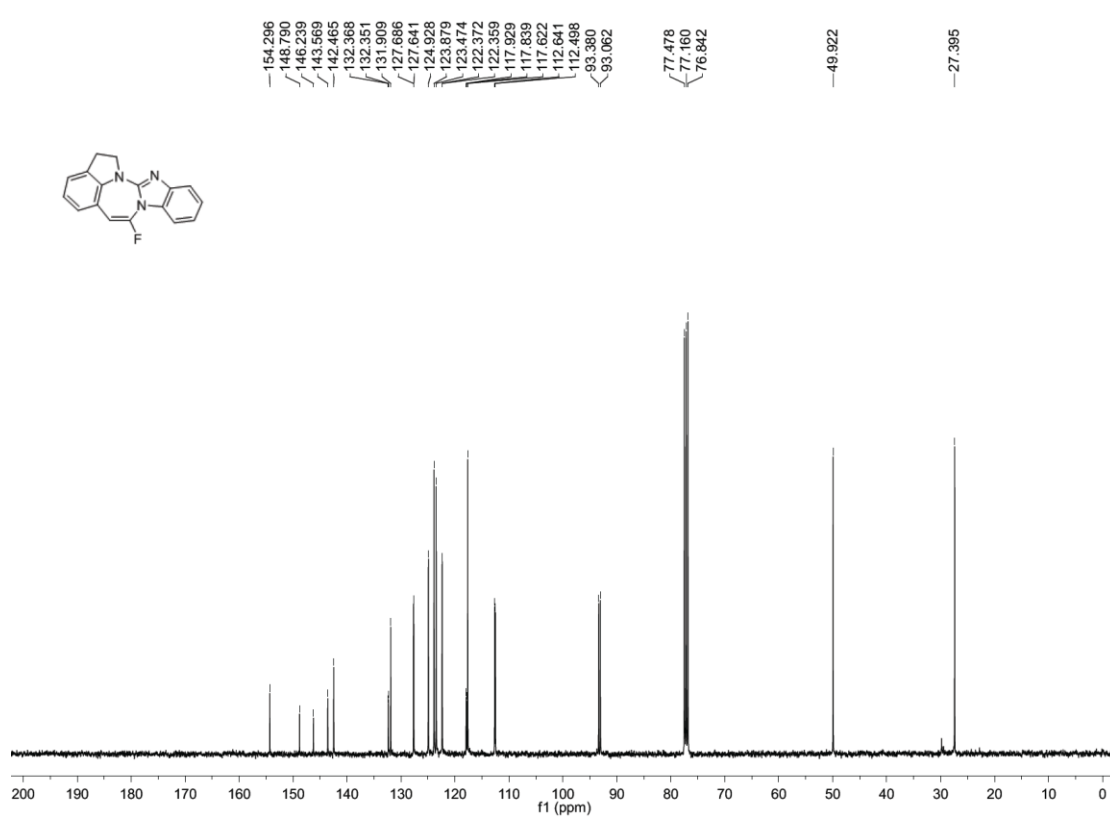

$^{19}\text{F}$ -NMR of **3a** ( $\text{CDCl}_3$ , 376 MHz)

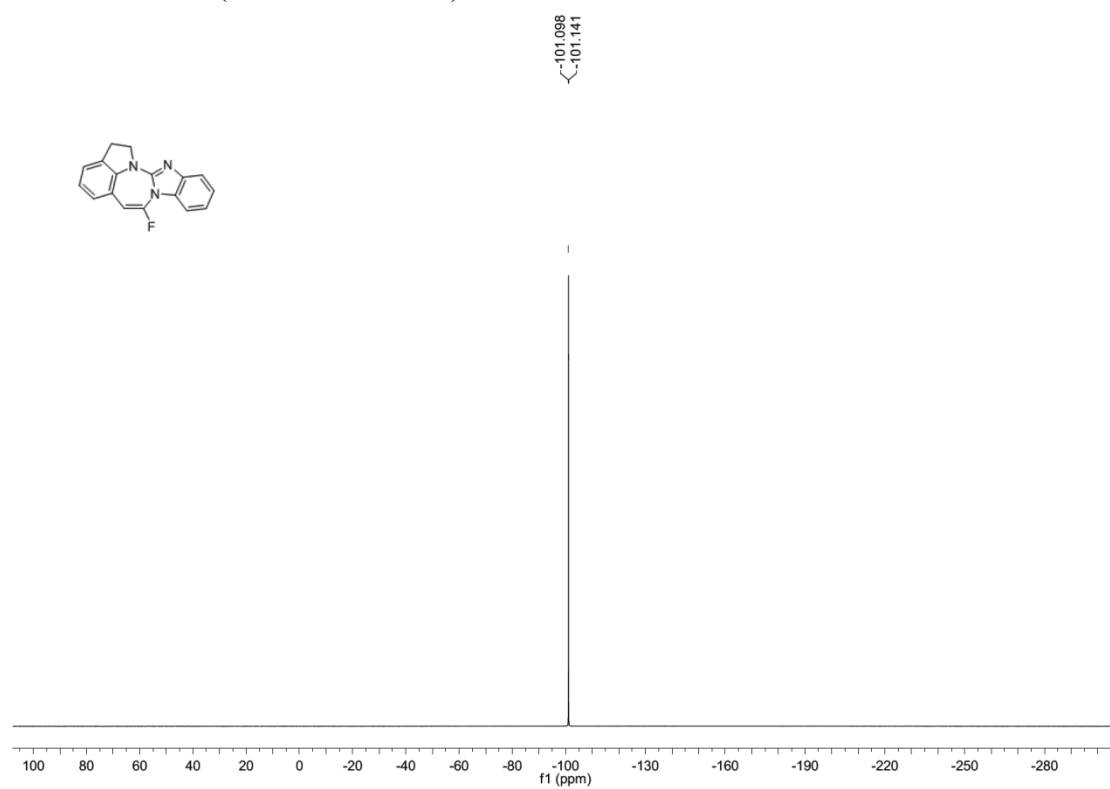



$^1\text{H-NMR}$  of **3b** ( $\text{CDCl}_3$ , 400 MHz)

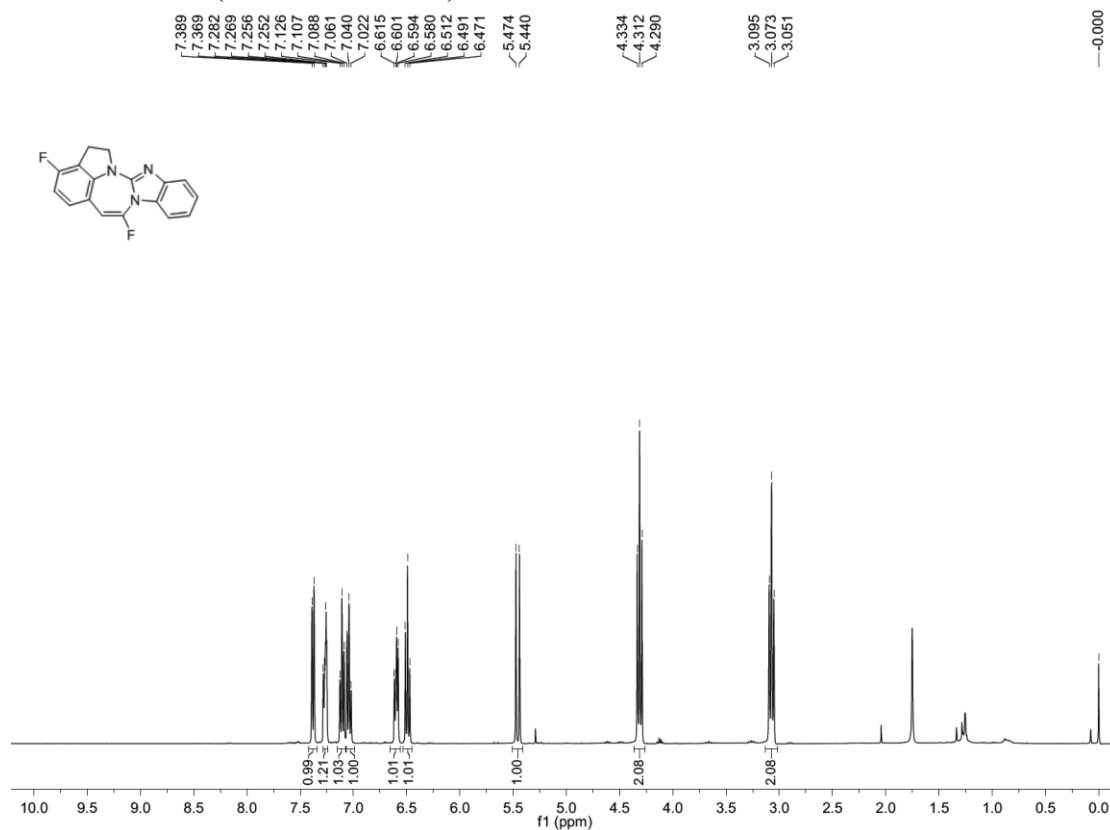

$^{13}\text{C}\{^1\text{H}\}$ -NMR of **3b** ( $\text{CDCl}_3$ , 100 MHz)

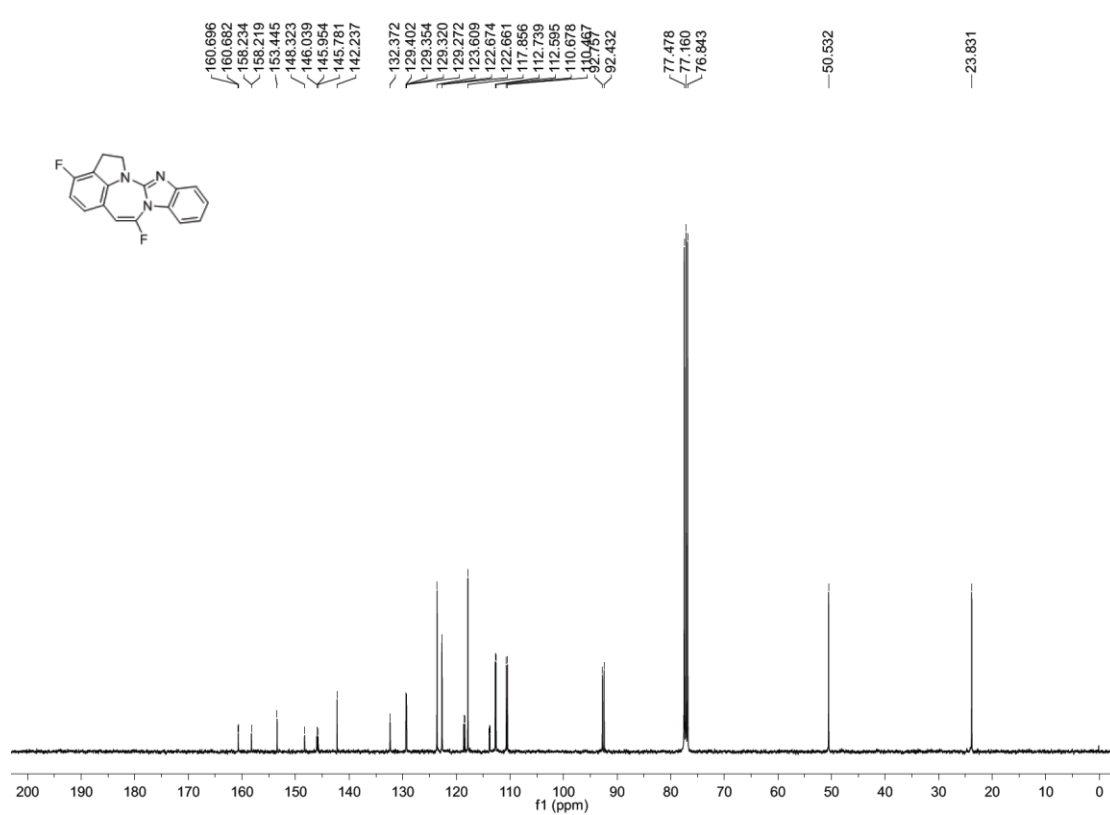

$^{19}\text{F}$ -NMR of **3b** ( $\text{CDCl}_3$ , 376 MHz)

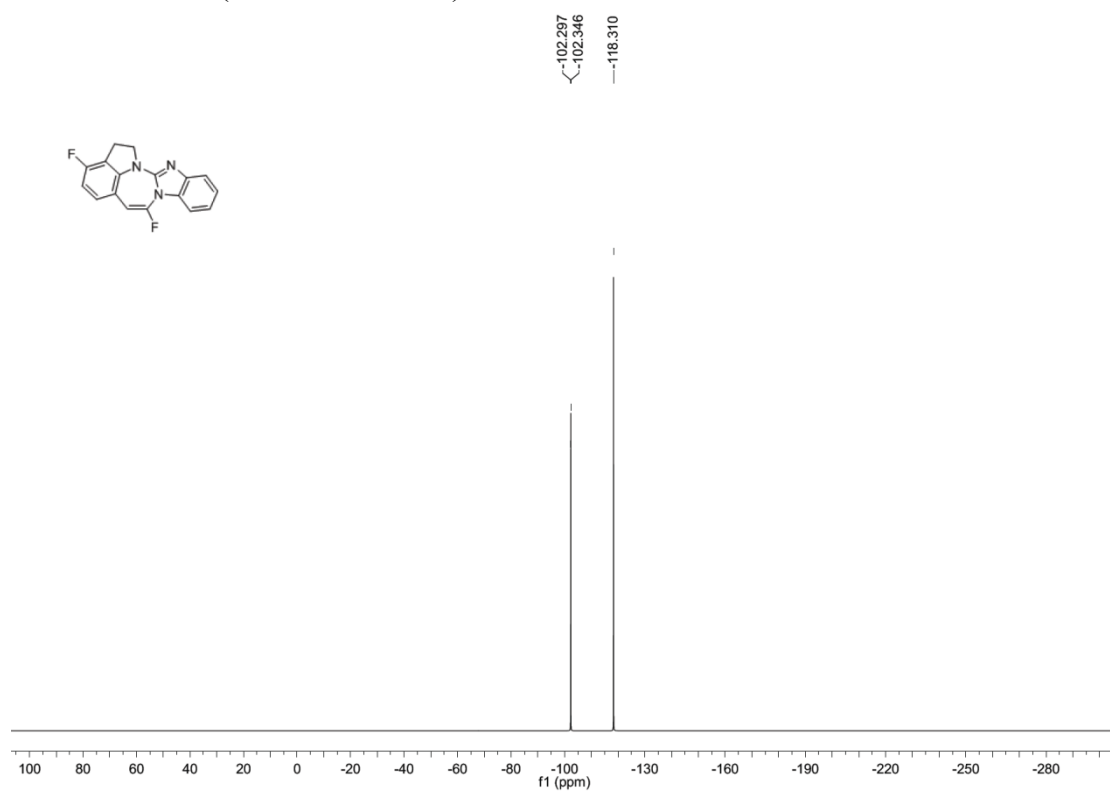

$^1\text{H-NMR}$  of **3c** ( $\text{CDCl}_3$ , 400 MHz)

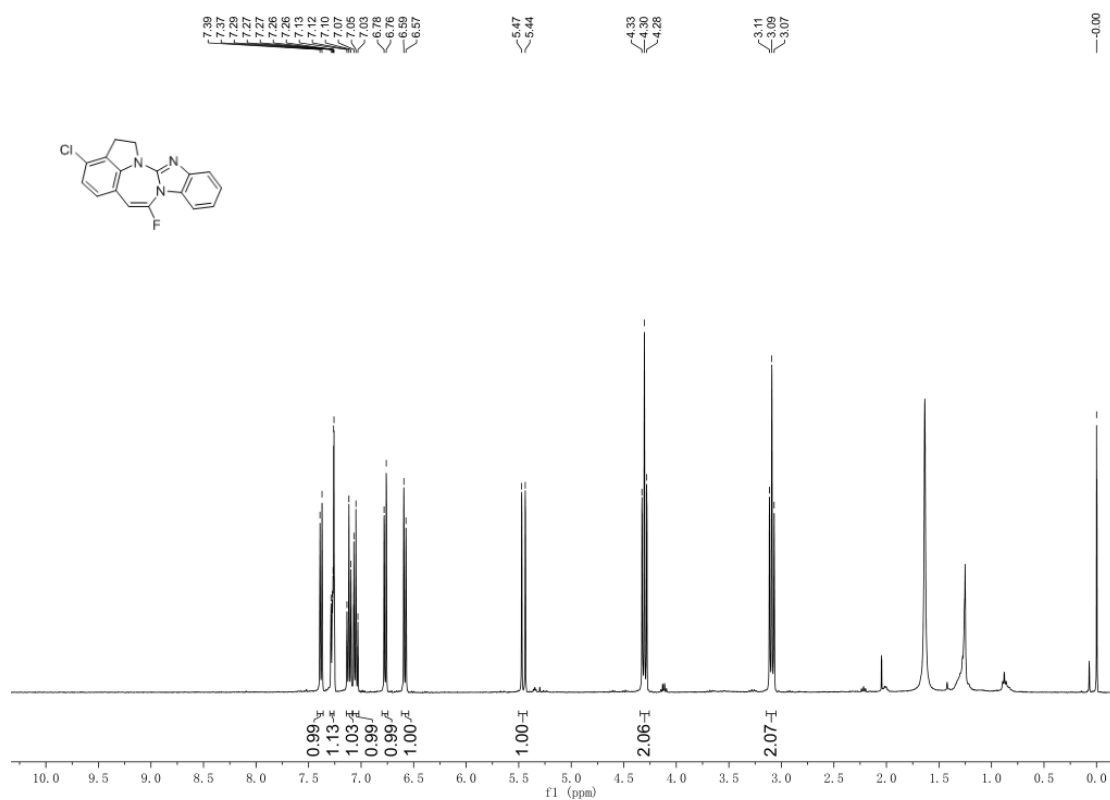

$^{13}\text{C}\{^1\text{H}\}$ -NMR of **3c** ( $\text{CDCl}_3$ , 100 MHz)

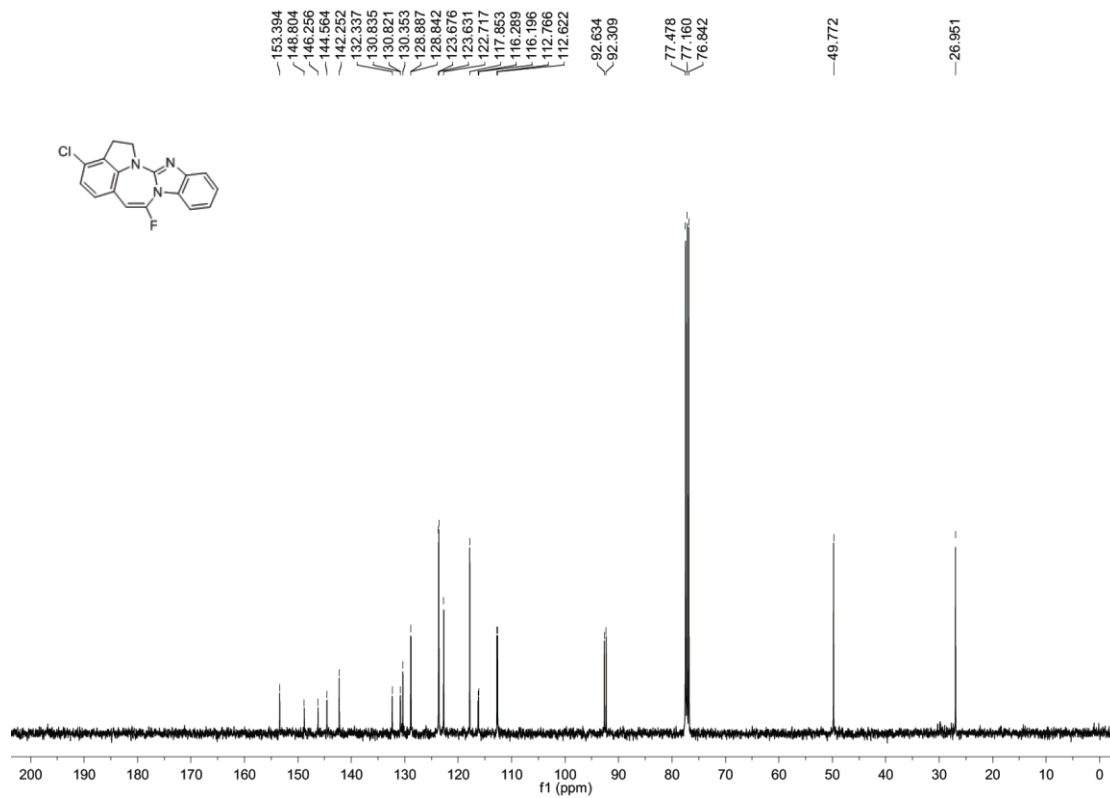

$^{19}\text{F}$ -NMR of **3c** ( $\text{CDCl}_3$ , 376 MHz)

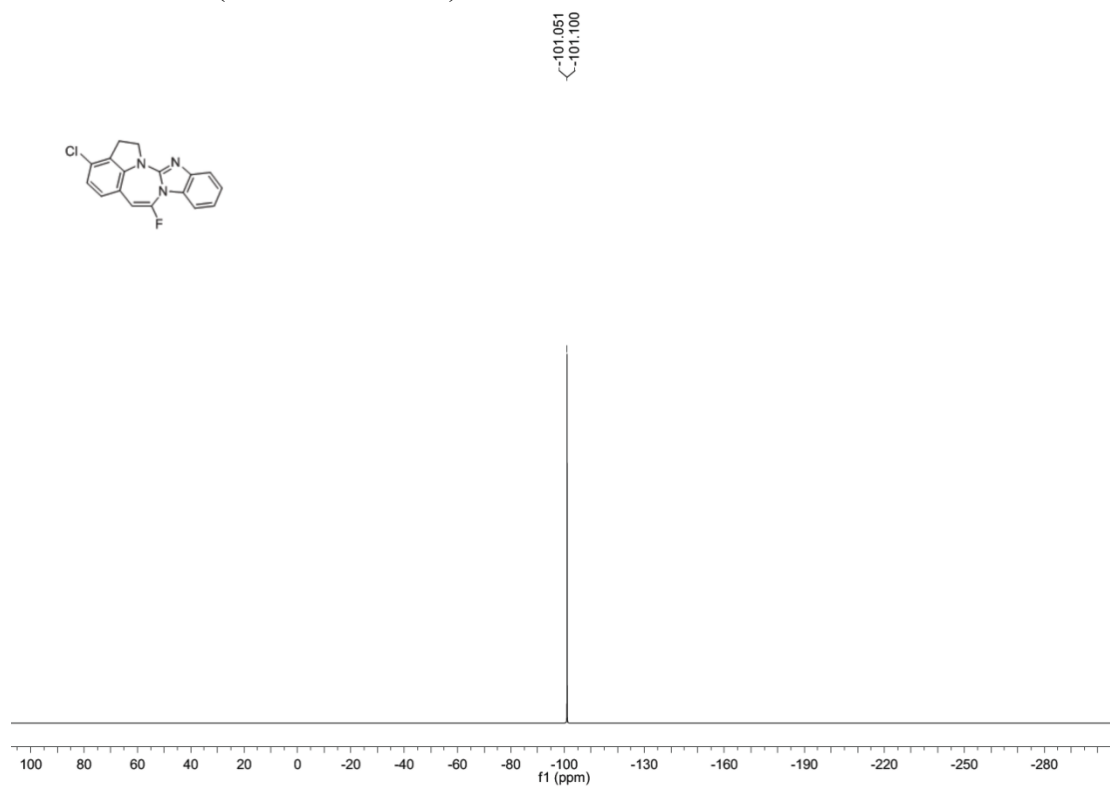

$^1\text{H-NMR}$  of **3d** ( $\text{CDCl}_3$ , 400 MHz)

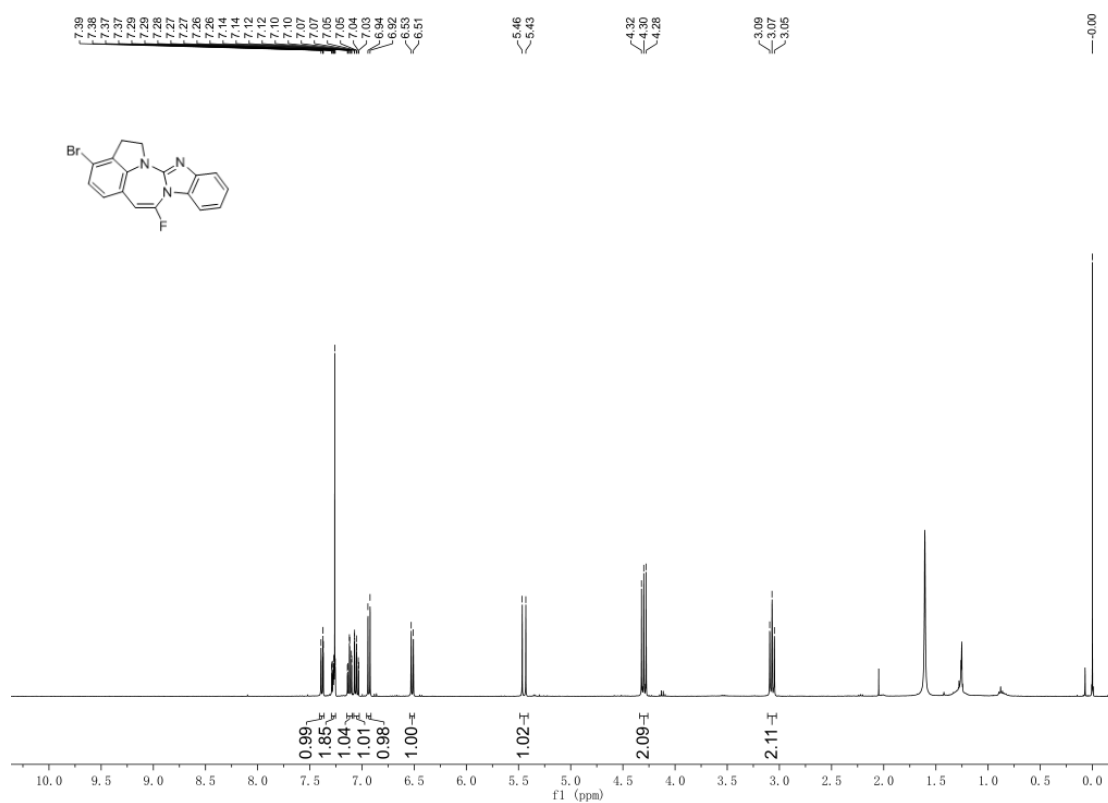

$^{13}\text{C}\{^1\text{H}\}$ -NMR of **3d** ( $\text{CDCl}_3$ , 100 MHz)

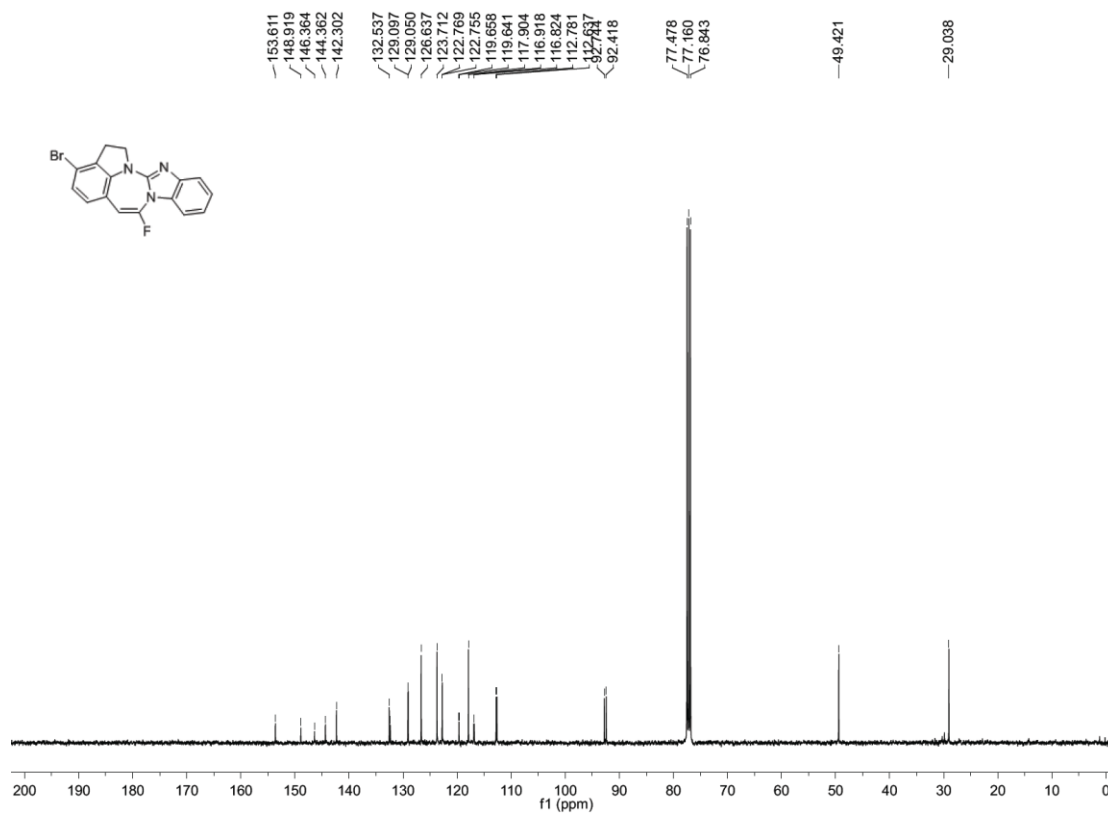

$^{19}\text{F}$ -NMR of **3d** ( $\text{CDCl}_3$ , 376 MHz)

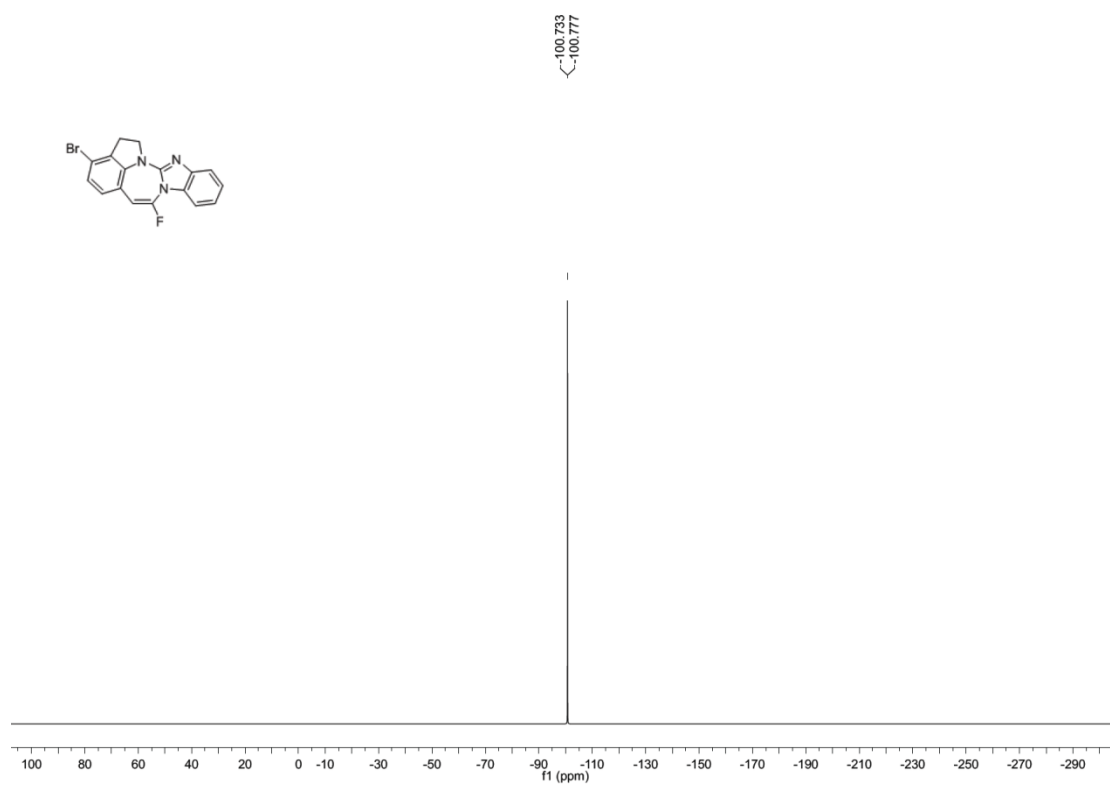

$^1\text{H-NMR}$  of **3e** ( $\text{CDCl}_3$ , 400 MHz)

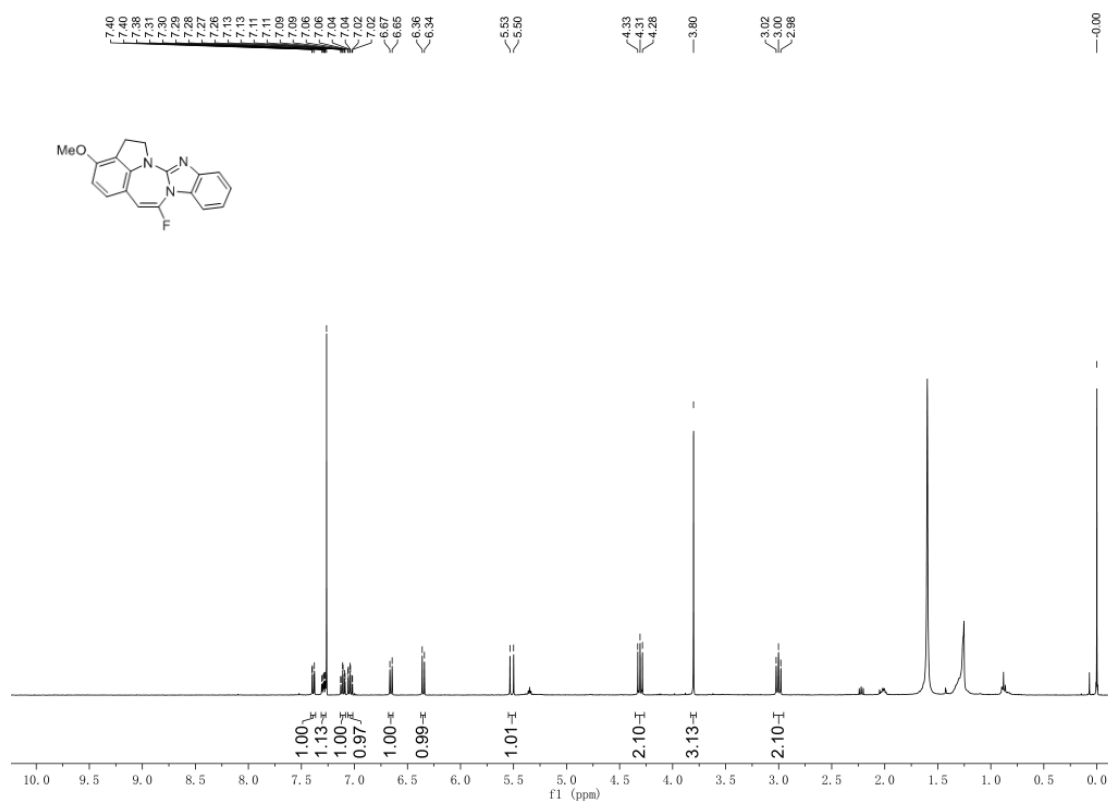

$^{13}\text{C}\{^1\text{H}\}$ -NMR of **3e** ( $\text{CDCl}_3$ , 100 MHz)

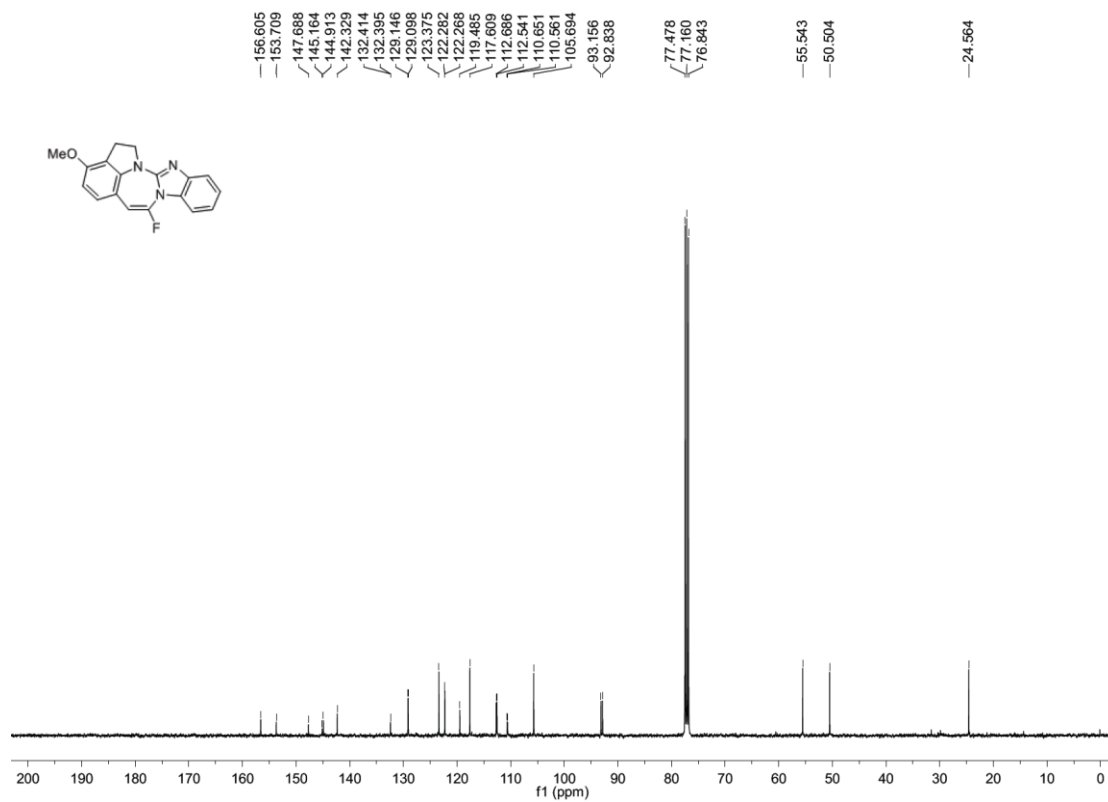

$^{19}\text{F}$ -NMR of **3e** ( $\text{CDCl}_3$ , 376 MHz)

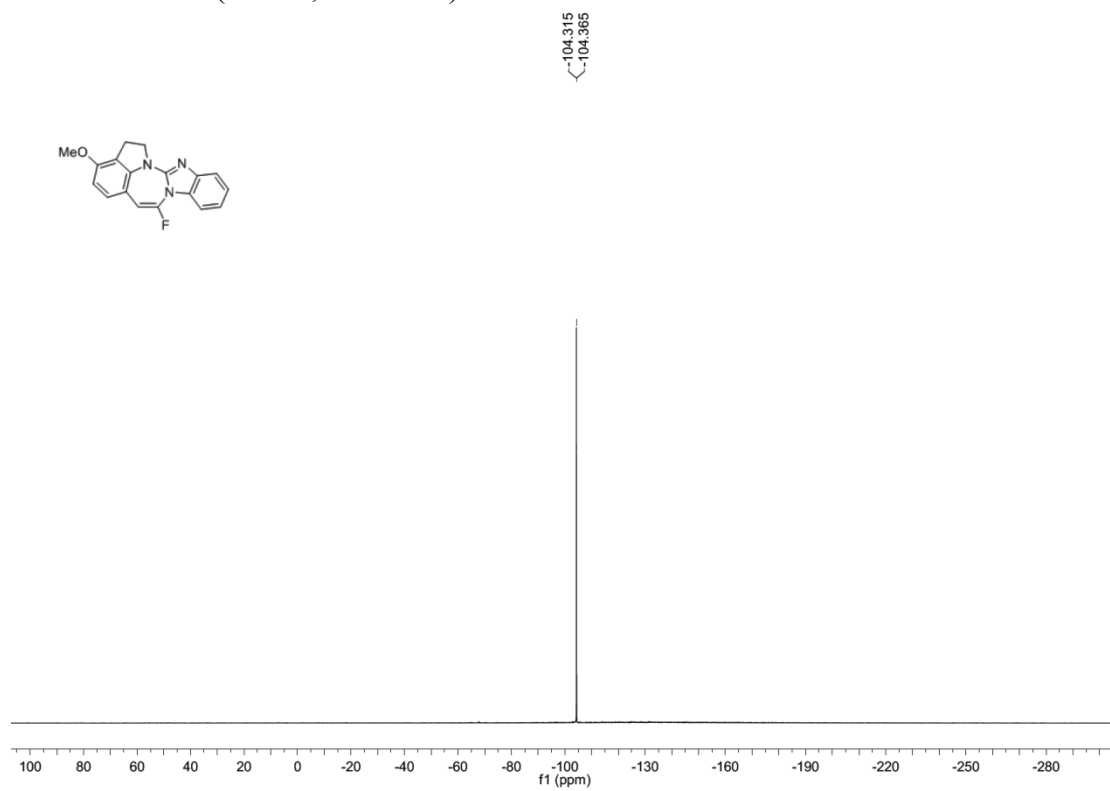



$^1\text{H-NMR}$  of **3f** ( $\text{CDCl}_3$ , 400 MHz)

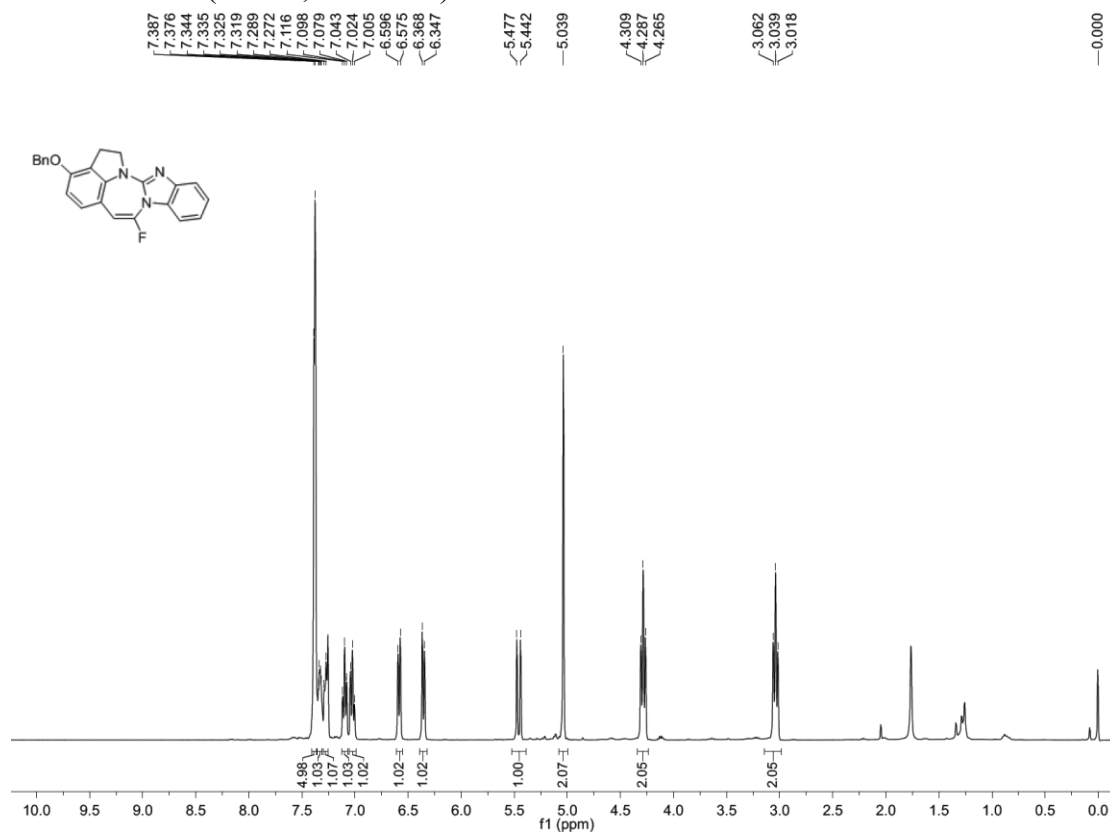

$^{13}\text{C}\{^1\text{H}\}$ -NMR of **3f** ( $\text{CDCl}_3$ , 100 MHz)

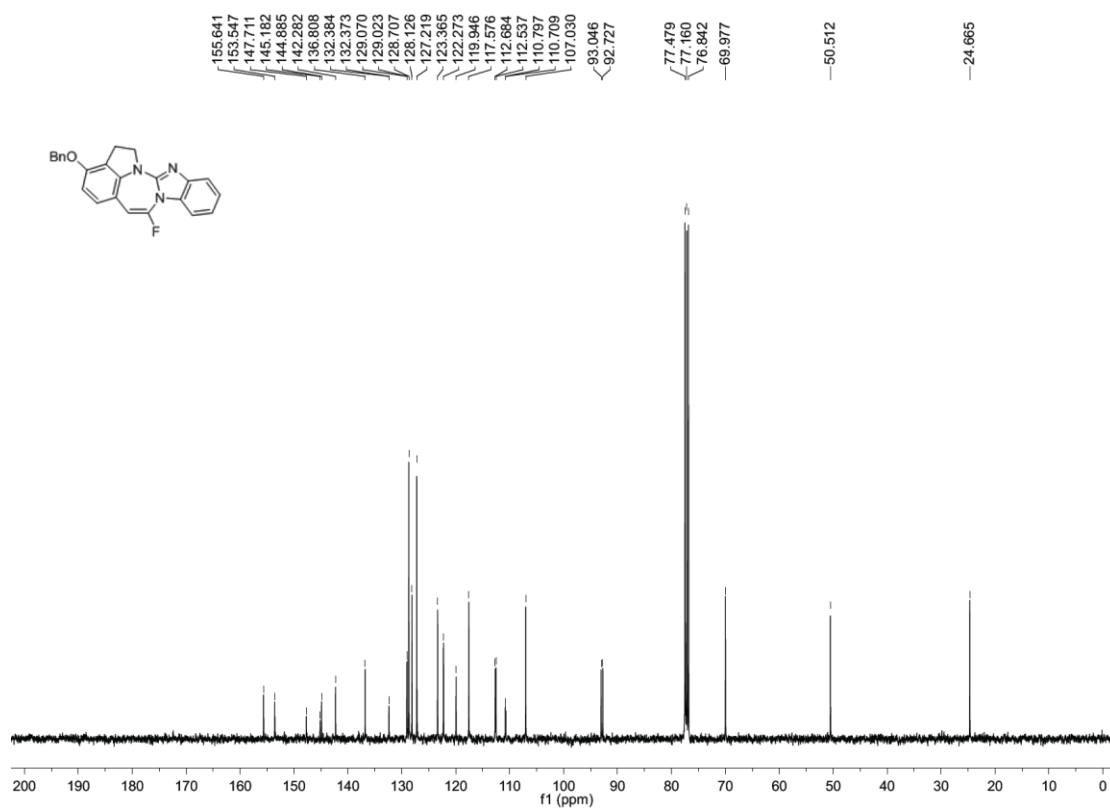

$^{19}\text{F}$ -NMR of **3f** ( $\text{CDCl}_3$ , 376 MHz)

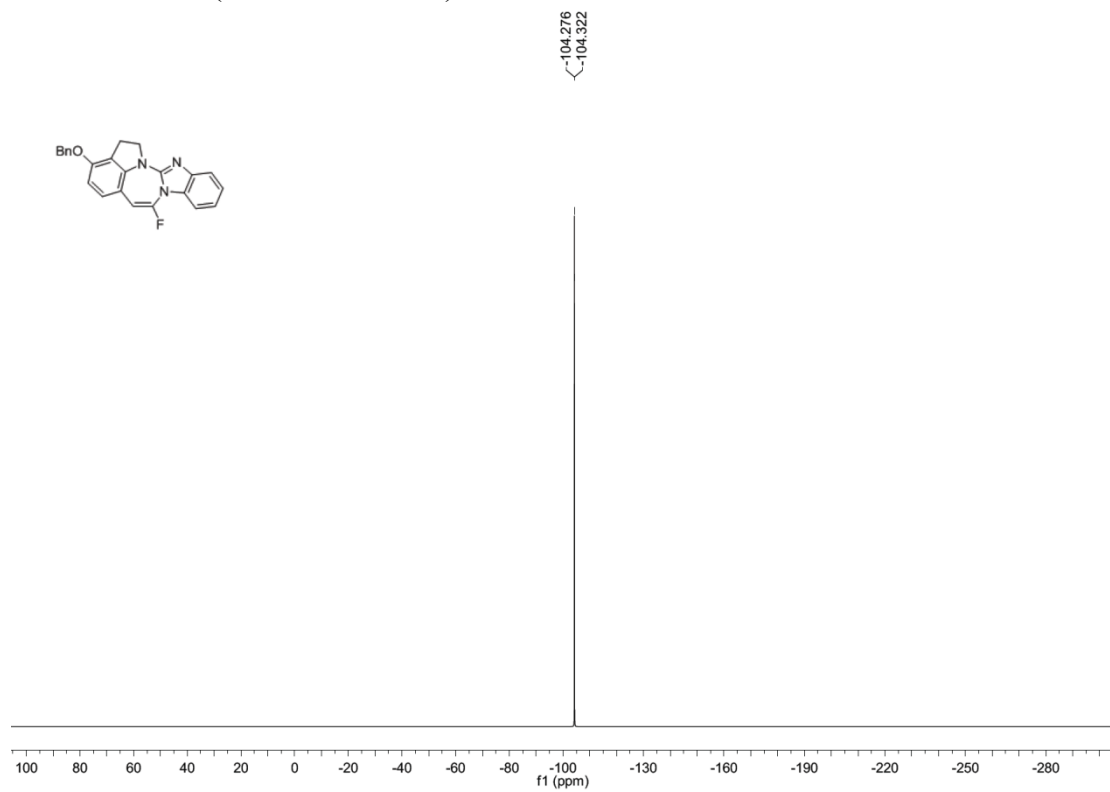

$^1\text{H-NMR}$  of **3g** ( $\text{CDCl}_3$ , 400 MHz)

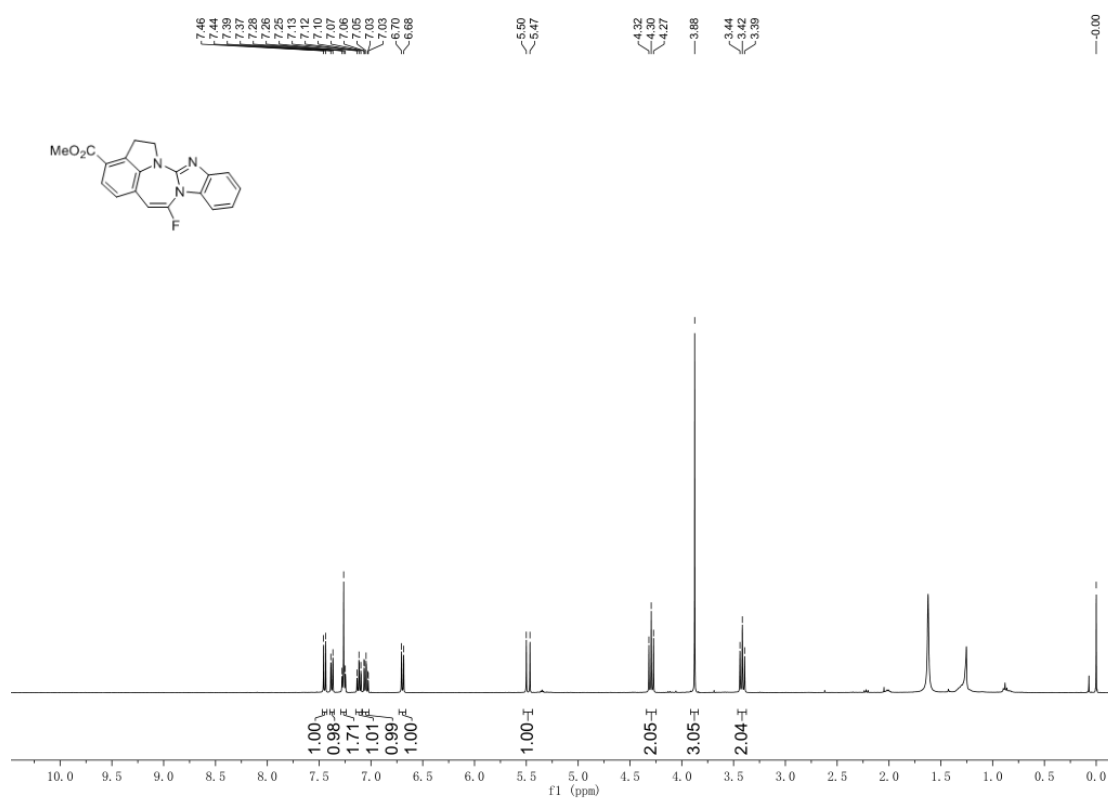

$^{13}\text{C}\{^1\text{H}\}$ -NMR of **3g** ( $\text{CDCl}_3$ , 100 MHz)

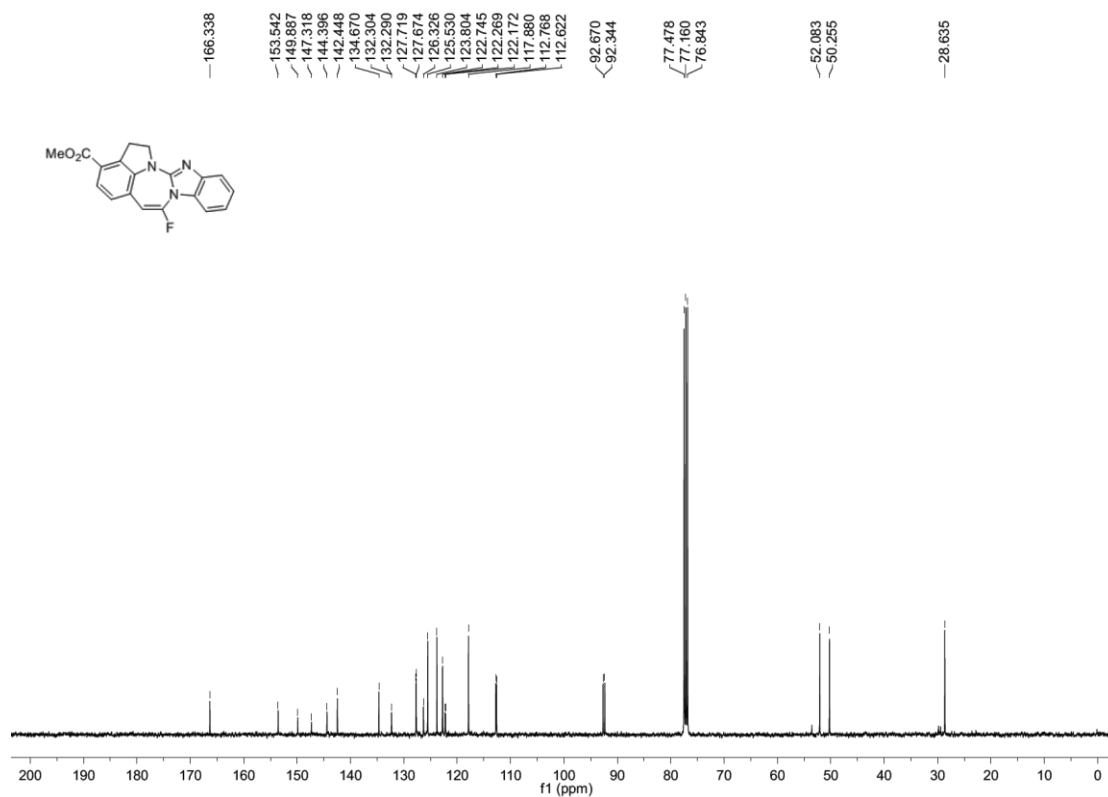

$^{19}\text{F}$ -NMR of **3g** ( $\text{CDCl}_3$ , 376 MHz)

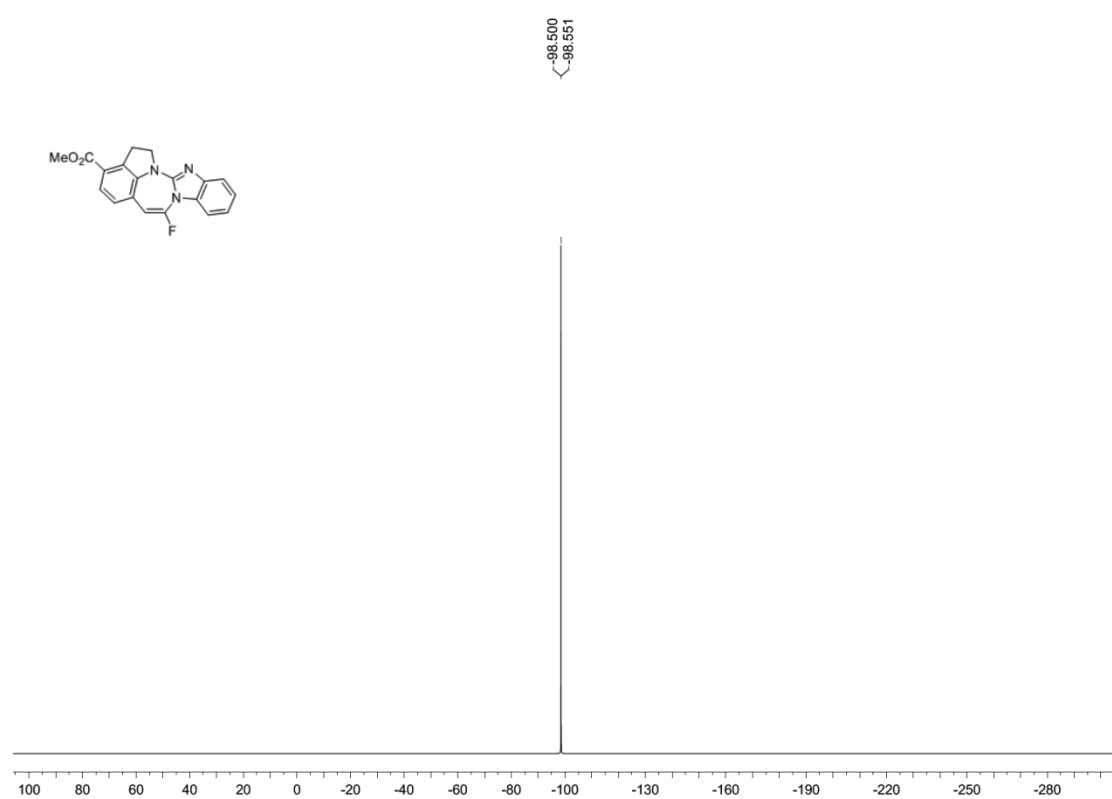

$^1\text{H-NMR}$  of **3h** ( $\text{CDCl}_3$ , 400 MHz)

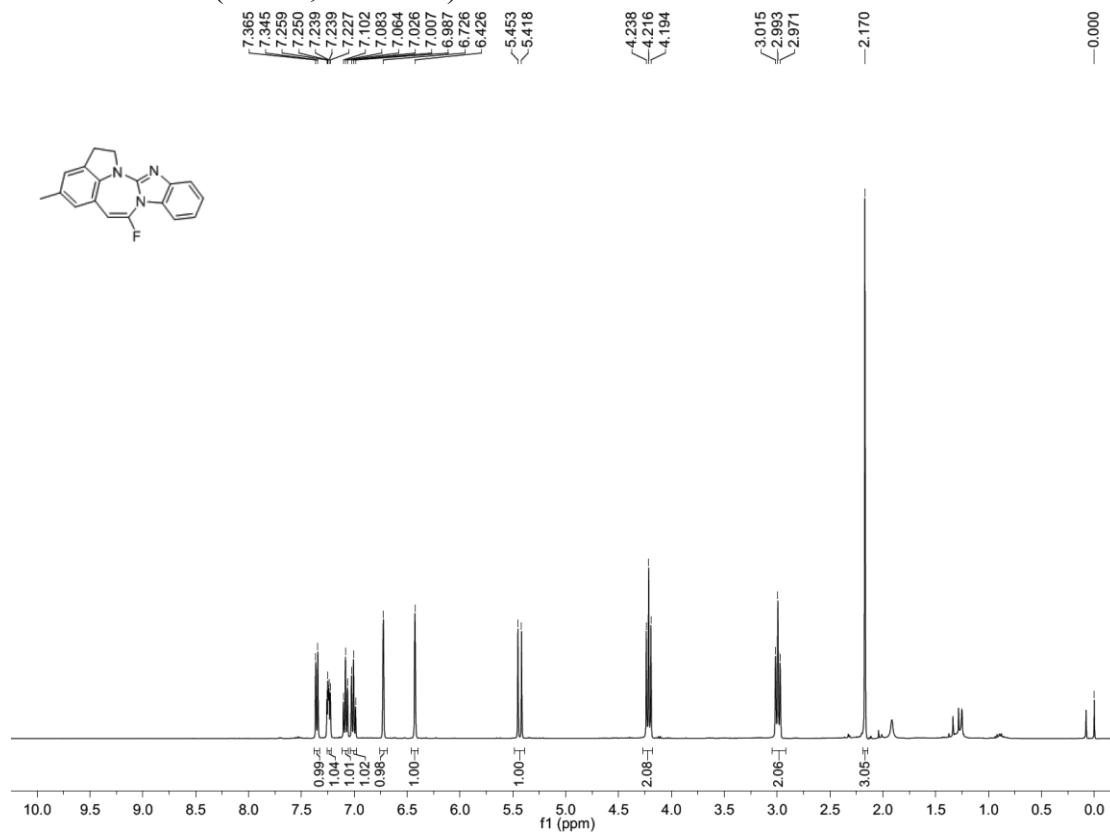

$^{13}\text{C}\{^1\text{H}\}$ -NMR of **3h** ( $\text{CDCl}_3$ , 100 MHz)

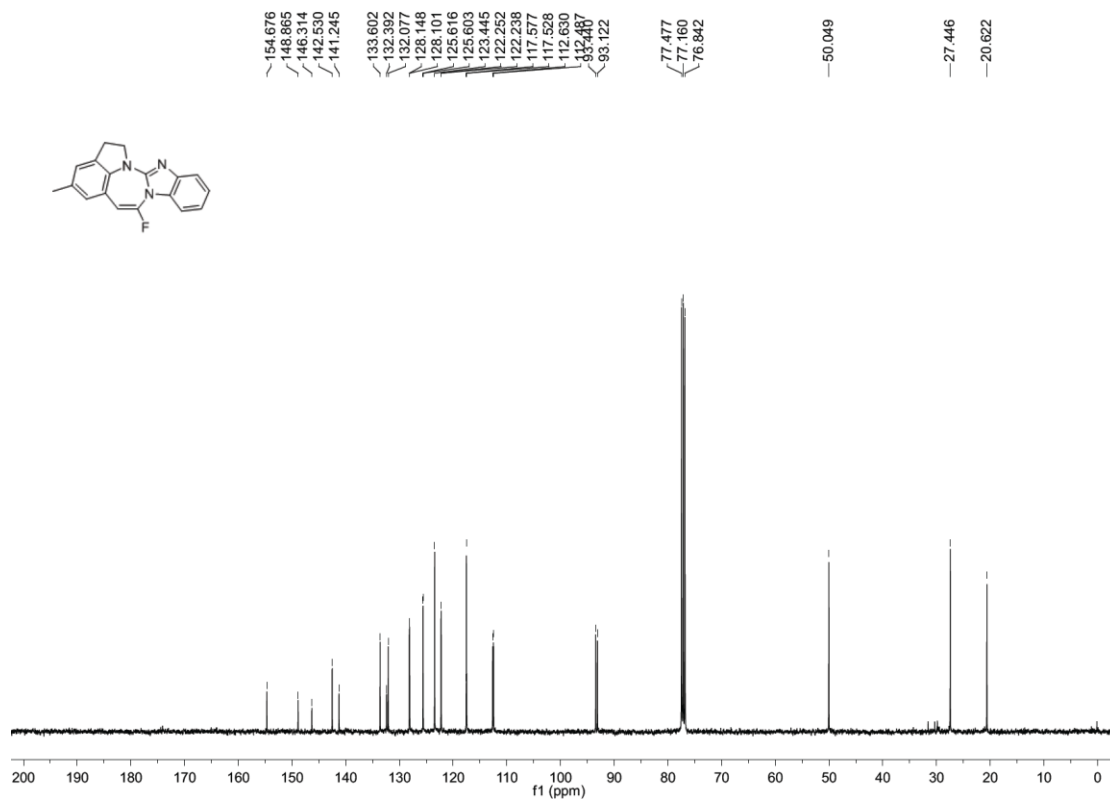

$^{19}\text{F}$ -NMR of **3h** ( $\text{CDCl}_3$ , 376 MHz)

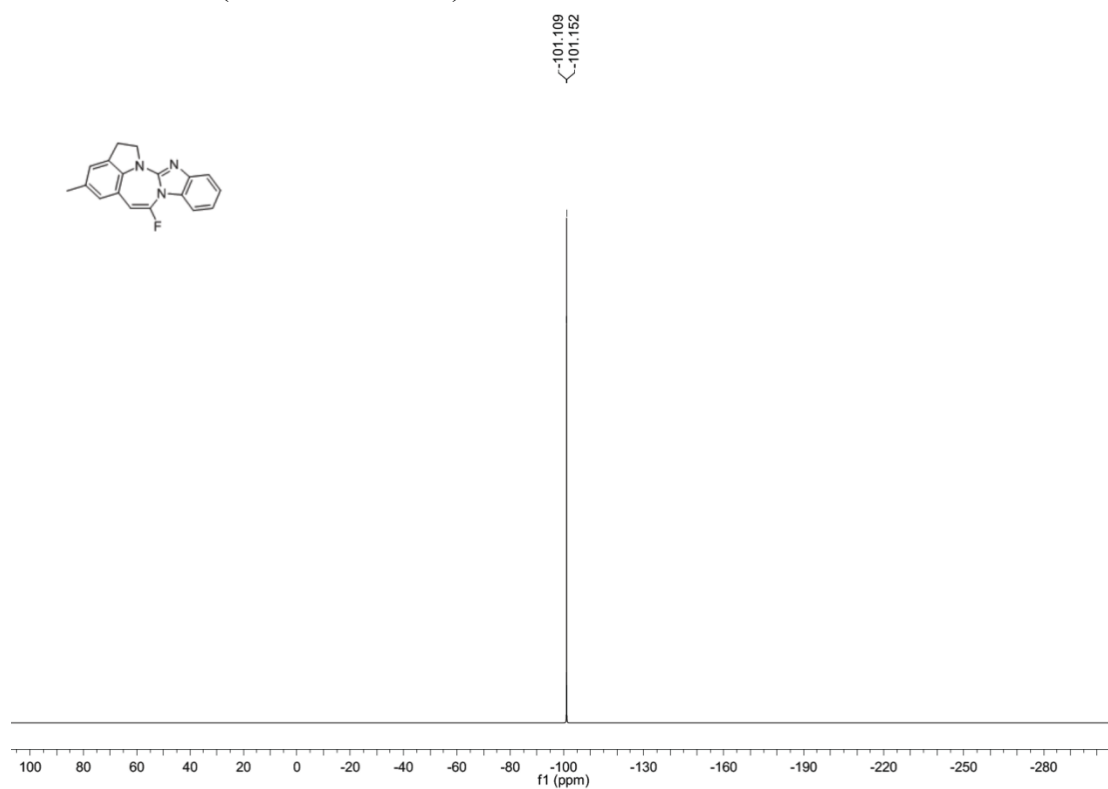

$^1\text{H-NMR}$  of **3i** ( $\text{CDCl}_3$ , 400 MHz)

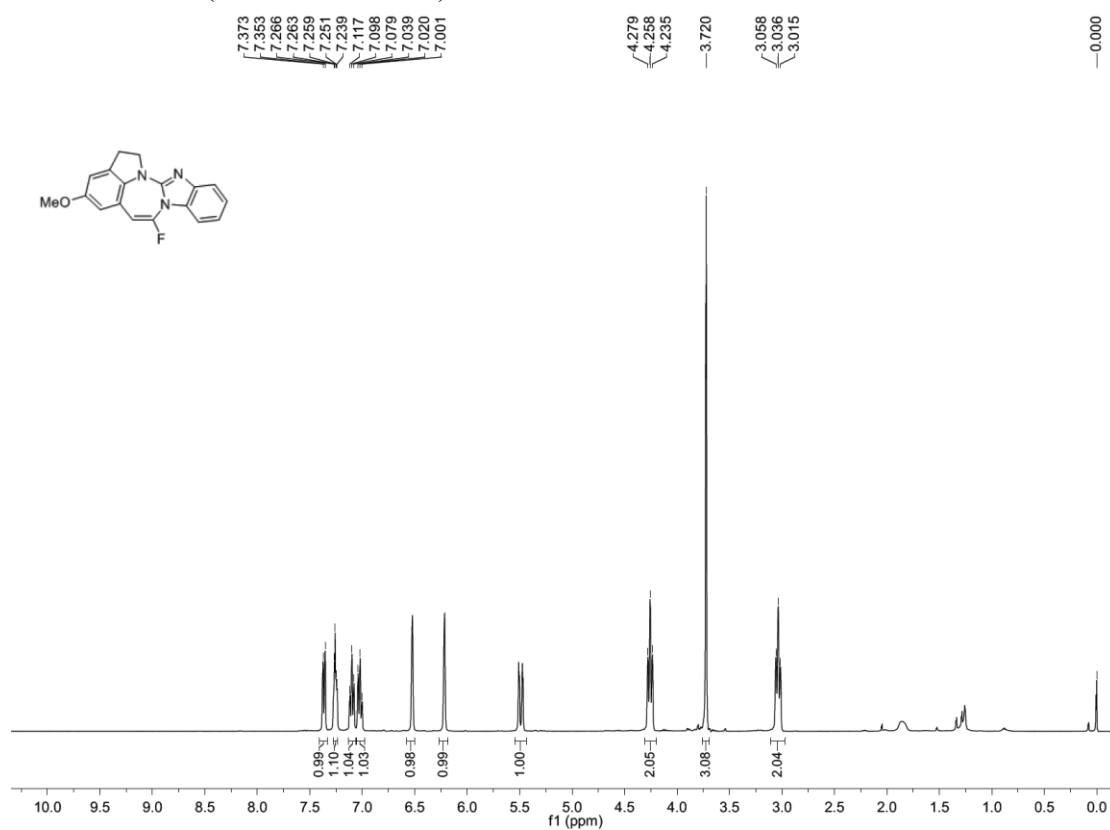

$^{13}\text{C}\{^1\text{H}\}$ -NMR of **3i** ( $\text{CDCl}_3$ , 100 MHz)

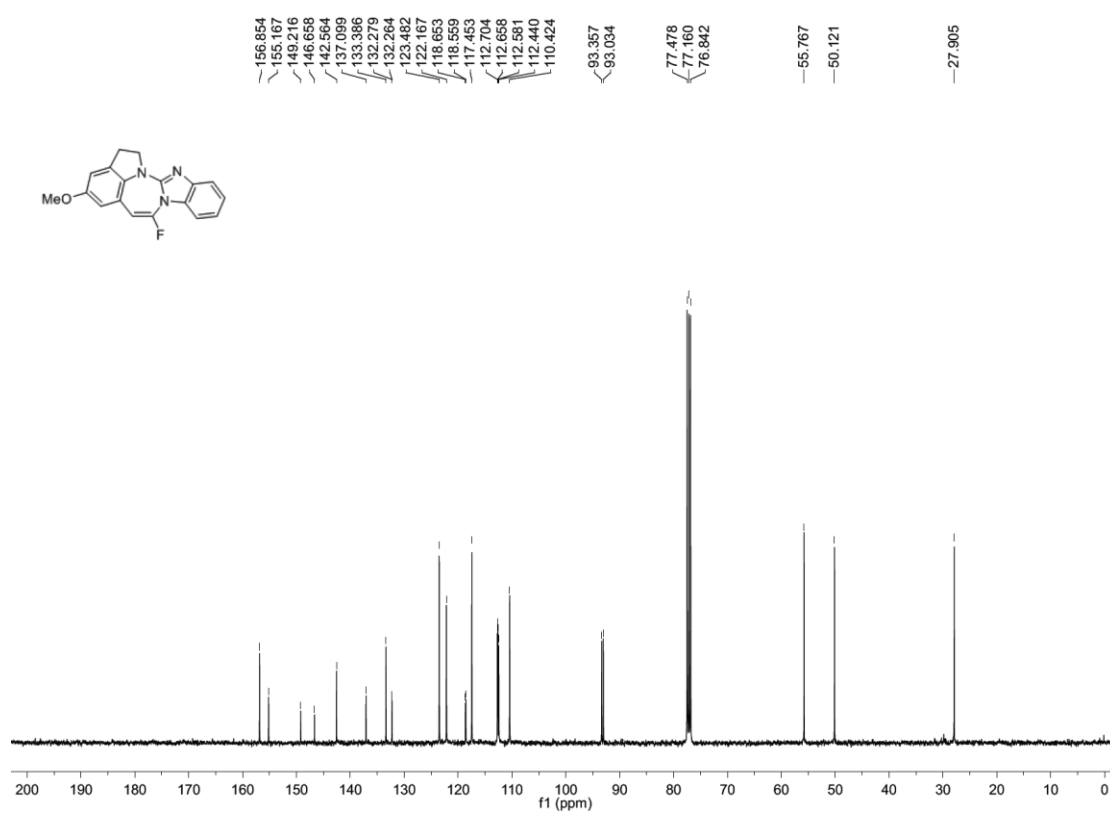

$^{19}\text{F}$ -NMR of **3i** ( $\text{CDCl}_3$ , 376 MHz)

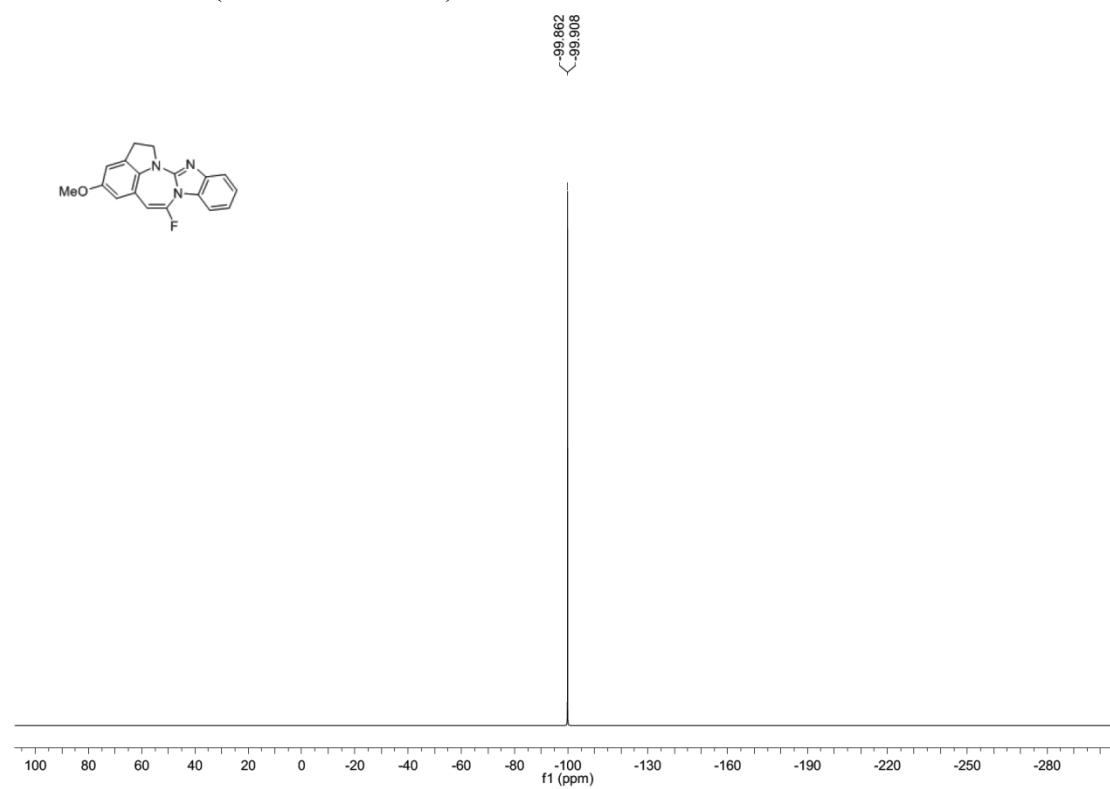



$^1\text{H-NMR}$  of **3j** ( $\text{CDCl}_3$ , 400 MHz)

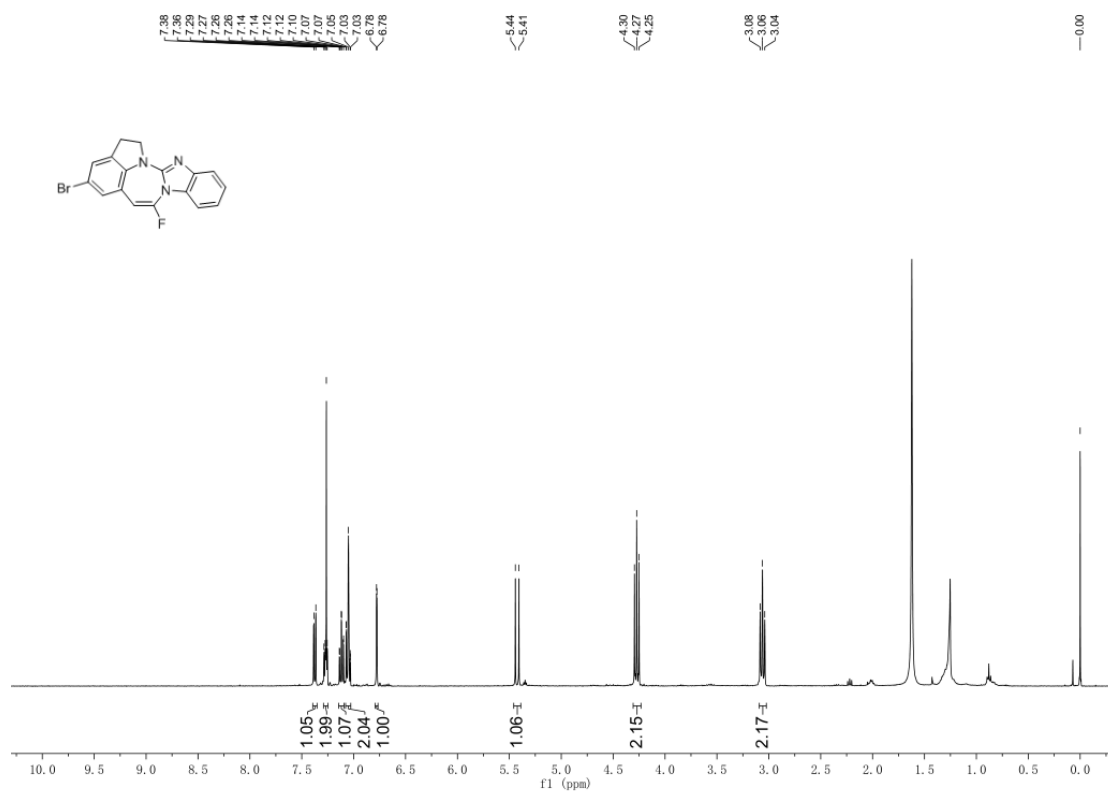

$^{13}\text{C}\{^1\text{H}\}$ -NMR of **3j** ( $\text{CDCl}_3$ , 100 MHz)

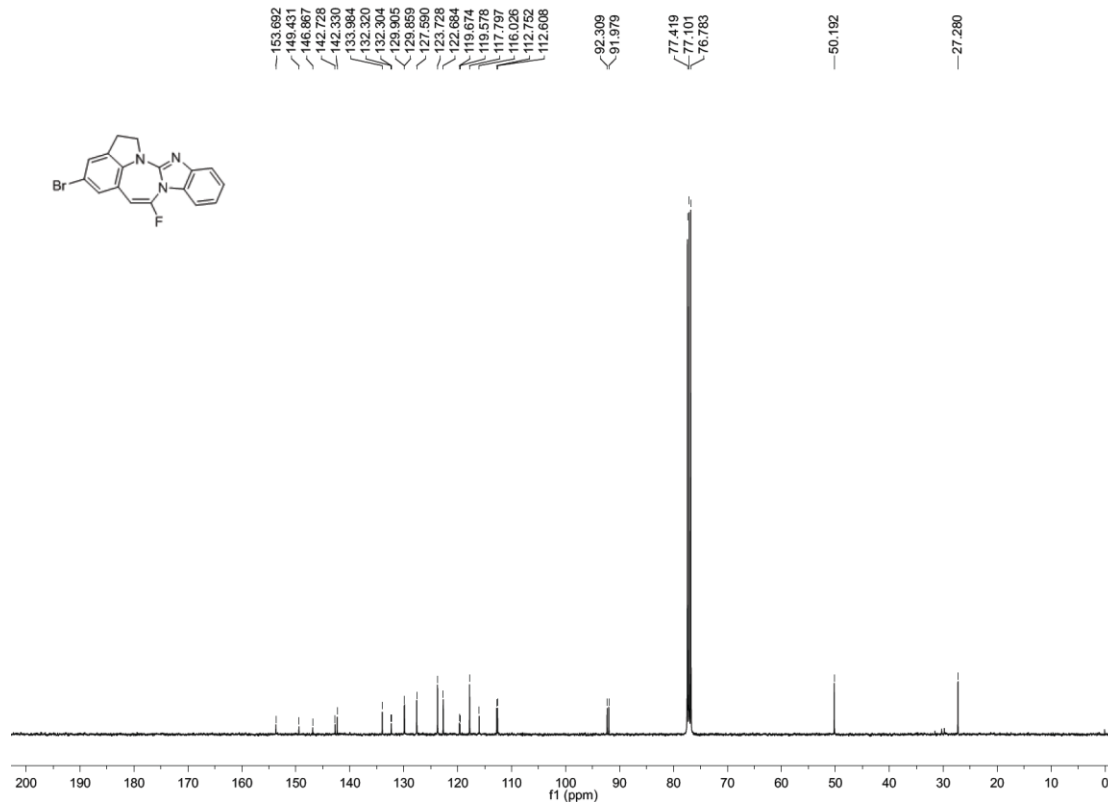

$^{19}\text{F}$ -NMR of **3j** ( $\text{CDCl}_3$ , 376 MHz)

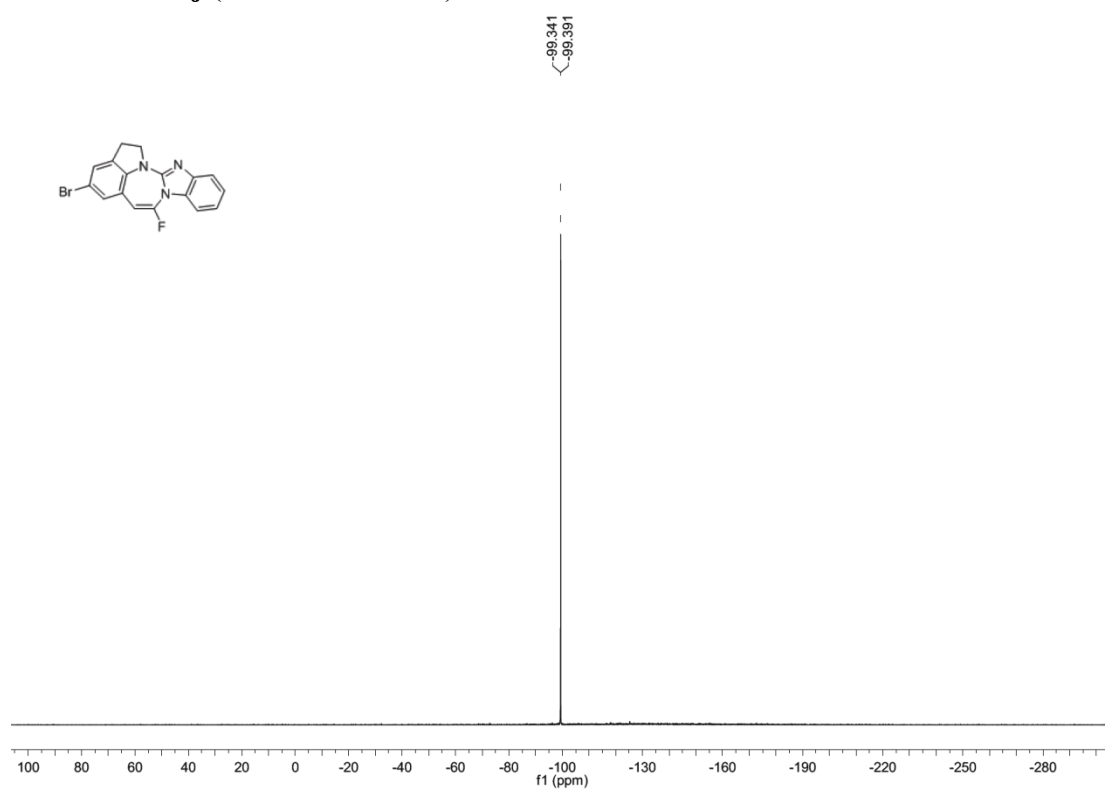

$^1\text{H-NMR}$  of **3k** ( $\text{CDCl}_3$ , 400 MHz)

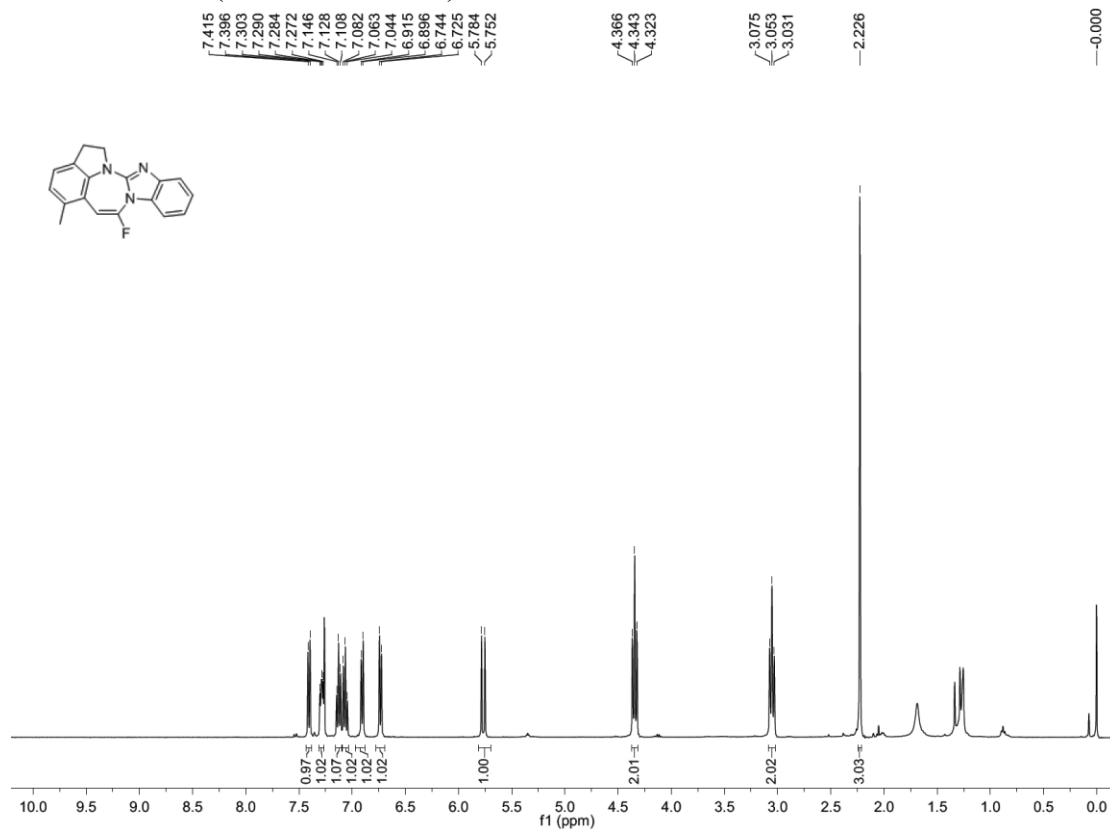

$^{13}\text{C}\{^1\text{H}\}$ -NMR of **3k** ( $\text{CDCl}_3$ , 100 MHz)

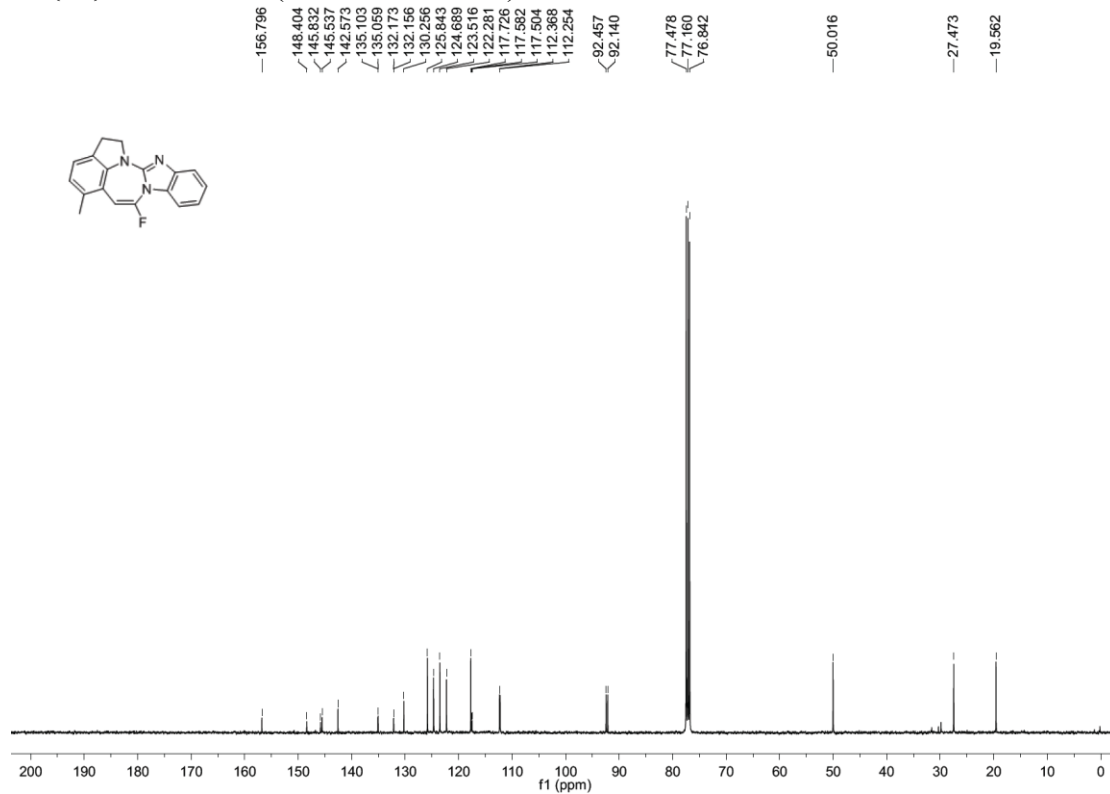

$^{19}\text{F}$ -NMR of **3k** ( $\text{CDCl}_3$ , 376 MHz)

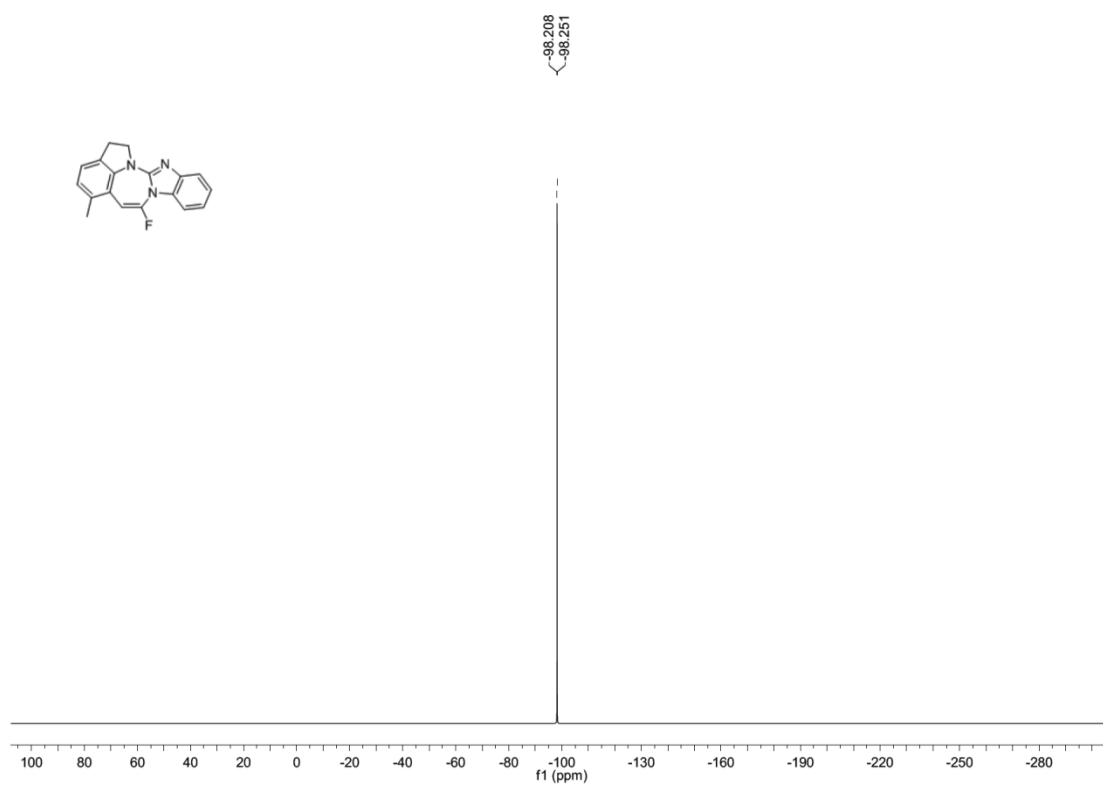

$^1\text{H-NMR}$  of **31** ( $\text{CDCl}_3$ , 400 MHz)

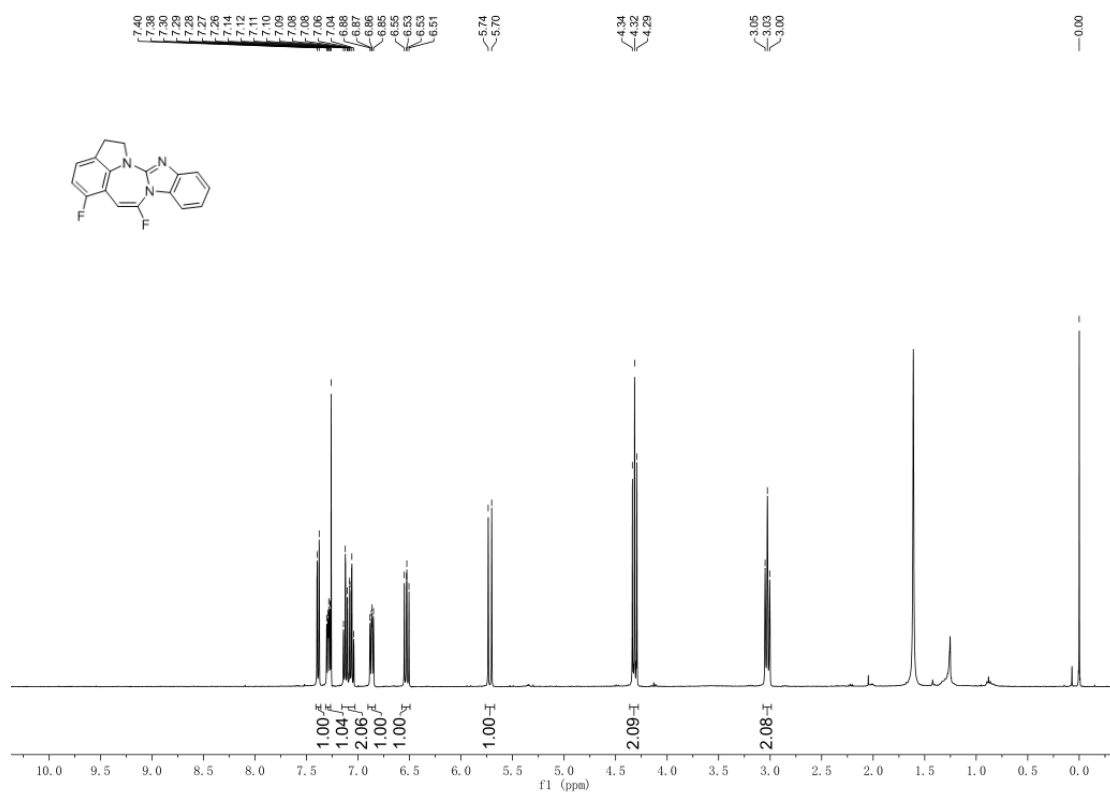

$^{13}\text{C}\{^1\text{H}\}$ -NMR of **31** ( $\text{CDCl}_3$ , 100 MHz)

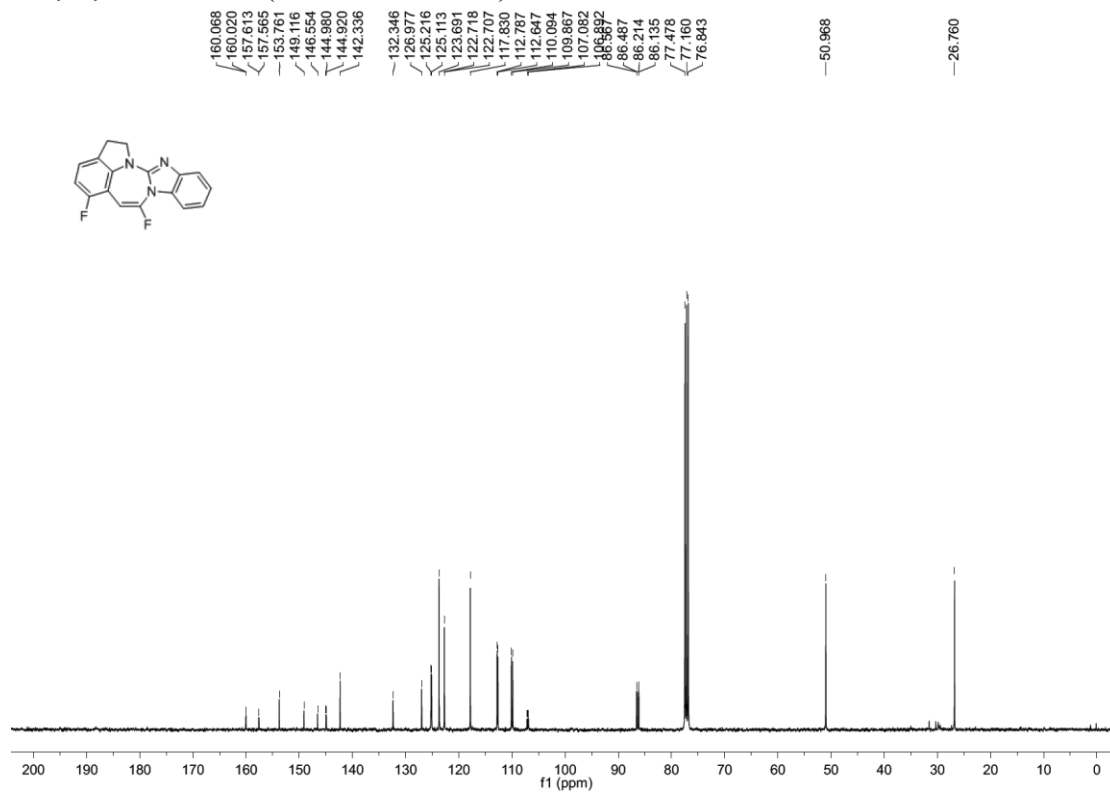

$^{19}\text{F}$ -NMR of **31** ( $\text{CDCl}_3$ , 376 MHz)

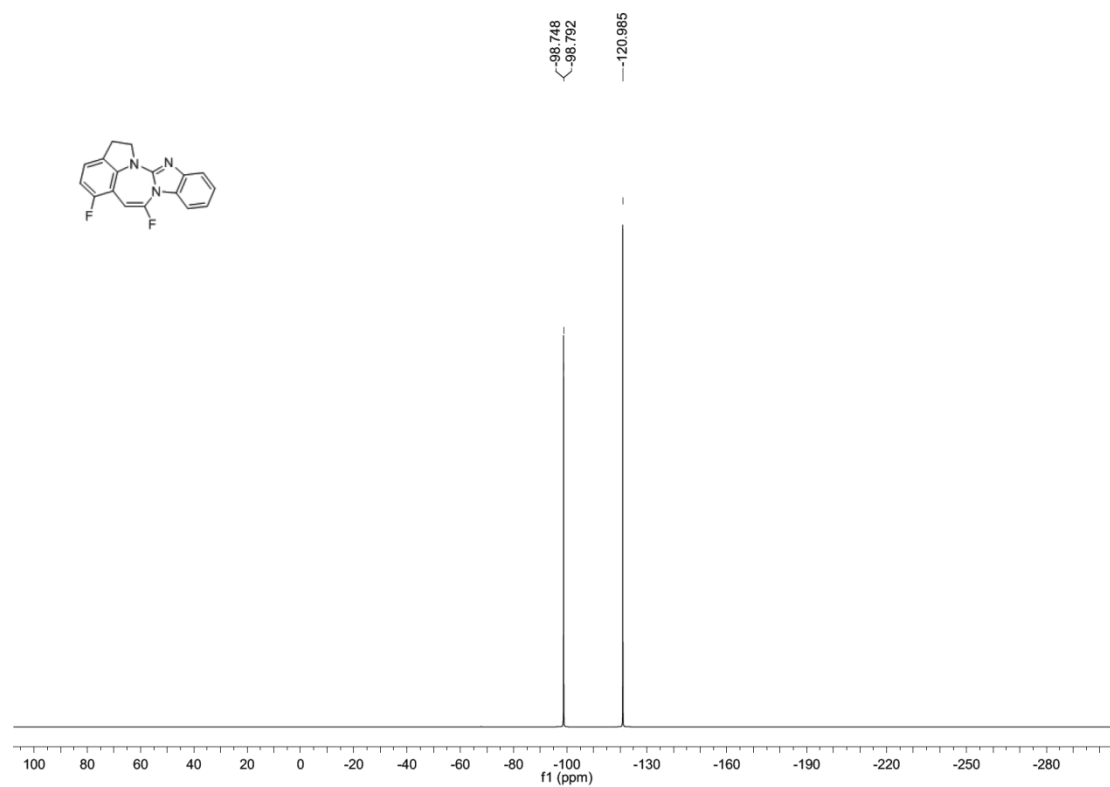

$^1\text{H-NMR}$  of **3m** ( $\text{CDCl}_3$ , 400 MHz)

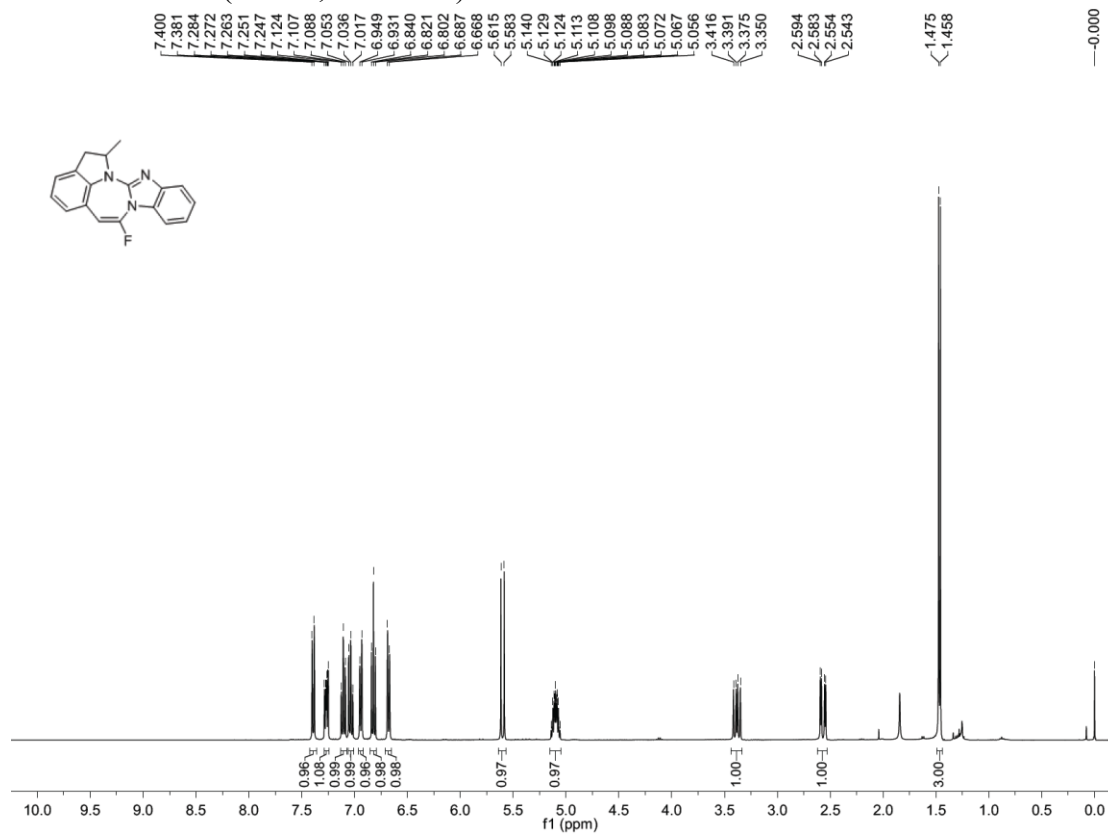

$^{13}\text{C}\{^1\text{H}\}$ -NMR of **3m** ( $\text{CDCl}_3$ , 100 MHz)

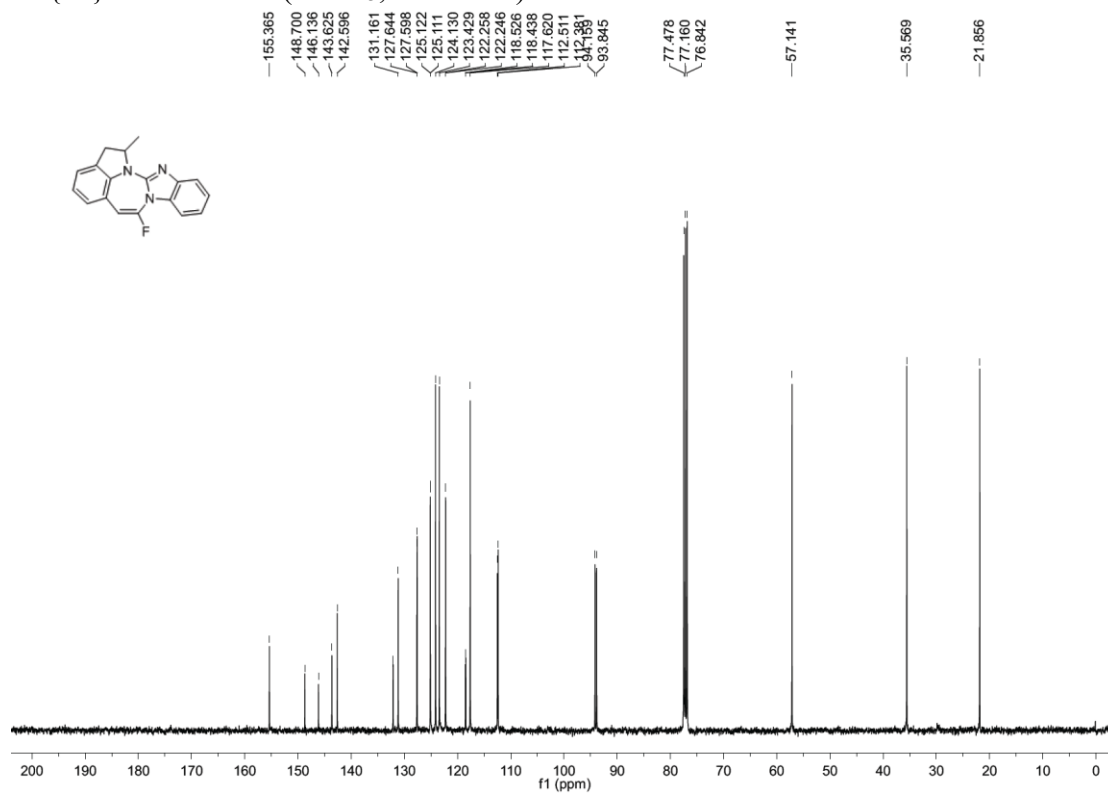

$^{19}\text{F}$ -NMR of **3m** ( $\text{CDCl}_3$ , 376 MHz)

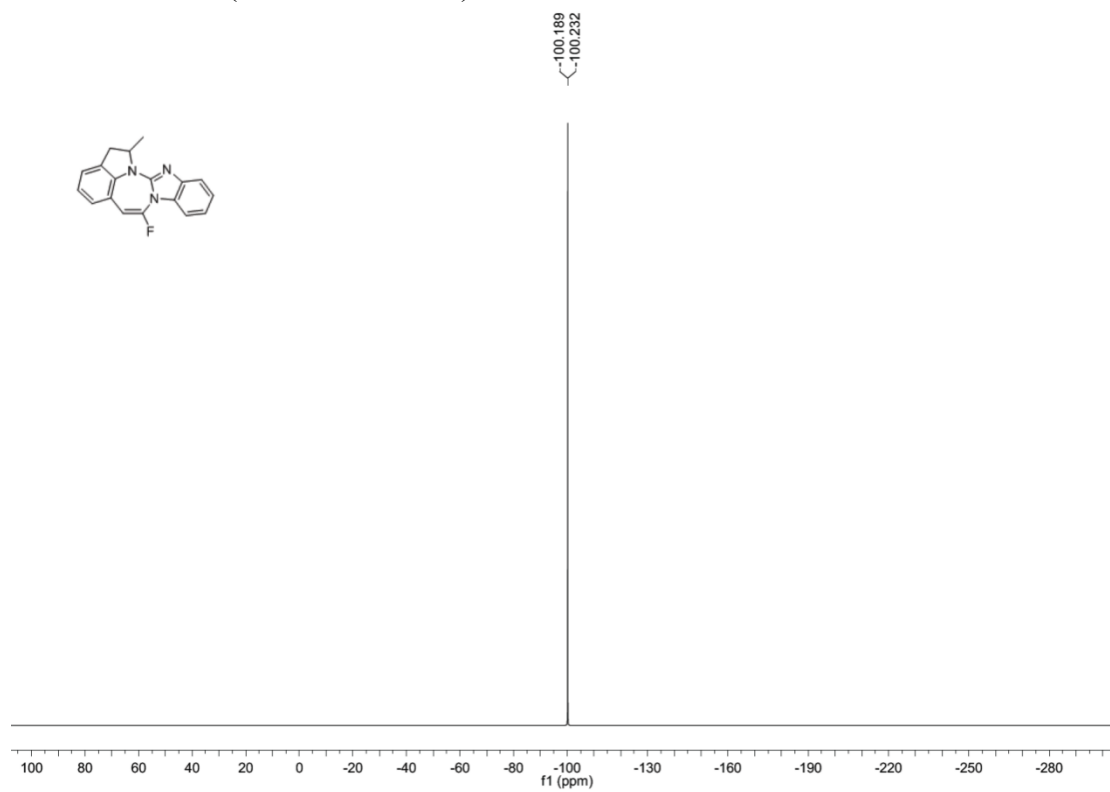



$^1\text{H-NMR}$  of **3n** ( $\text{CDCl}_3$ , 400 MHz)

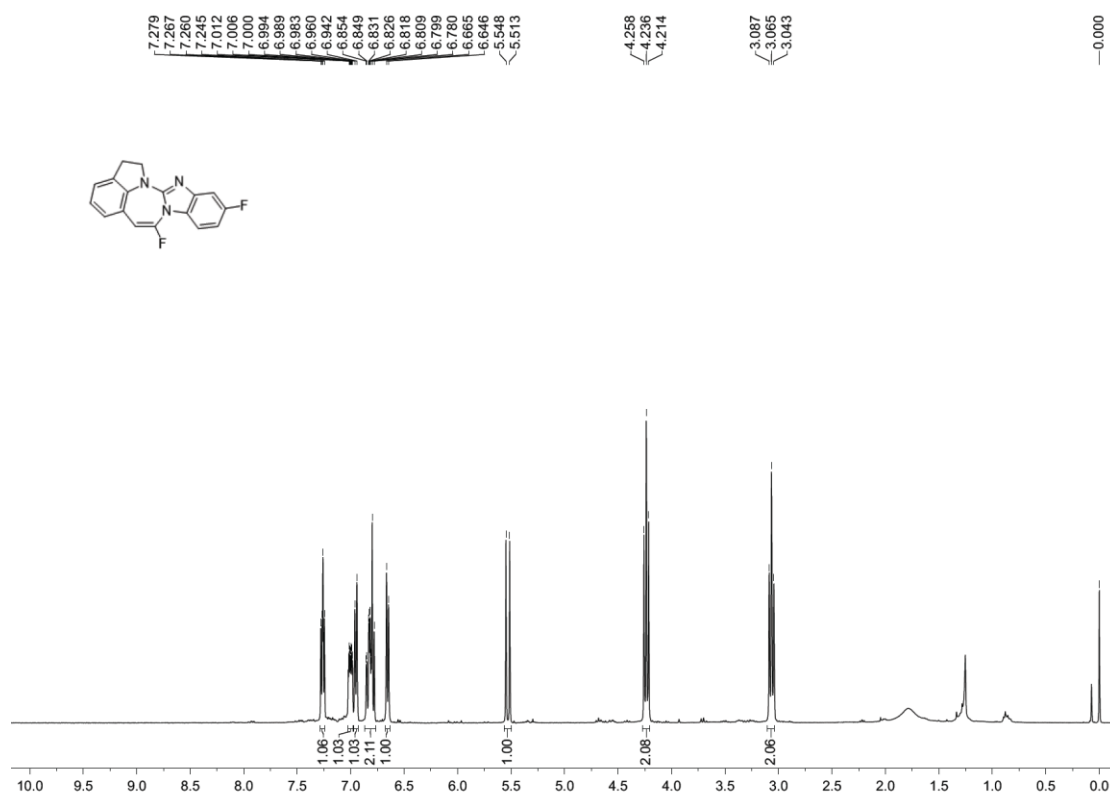

$^{13}\text{C}\{^1\text{H}\}$ -NMR of **3n** ( $\text{CDCl}_3$ , 100 MHz)

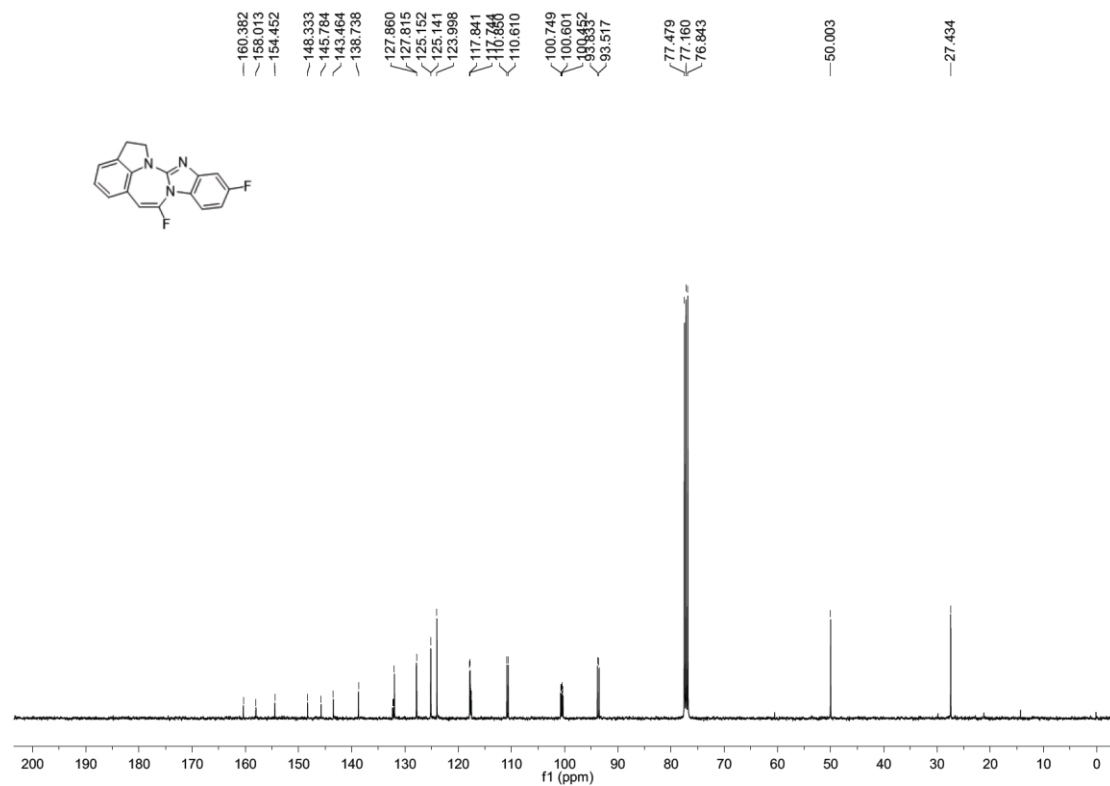

$^{19}\text{F}$ -NMR of **3n** ( $\text{CDCl}_3$ , 376 MHz)

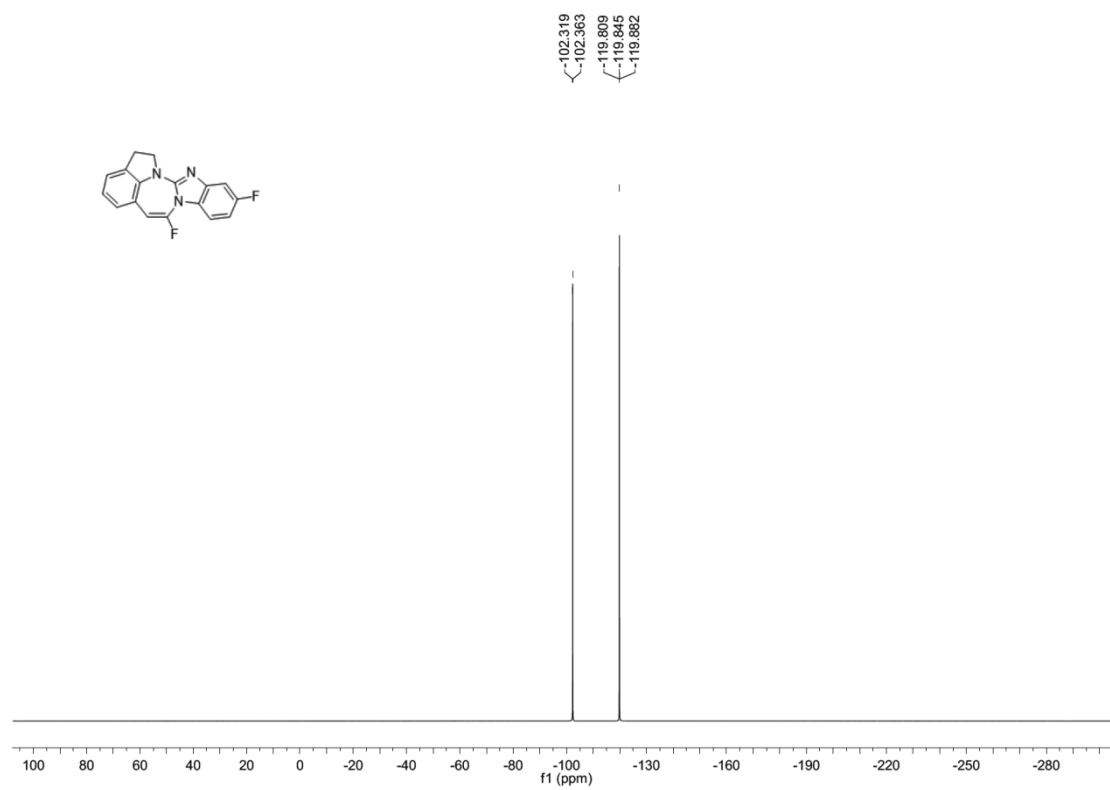

$^1\text{H-NMR}$  of **3n'** ( $\text{CDCl}_3$ , 400 MHz)

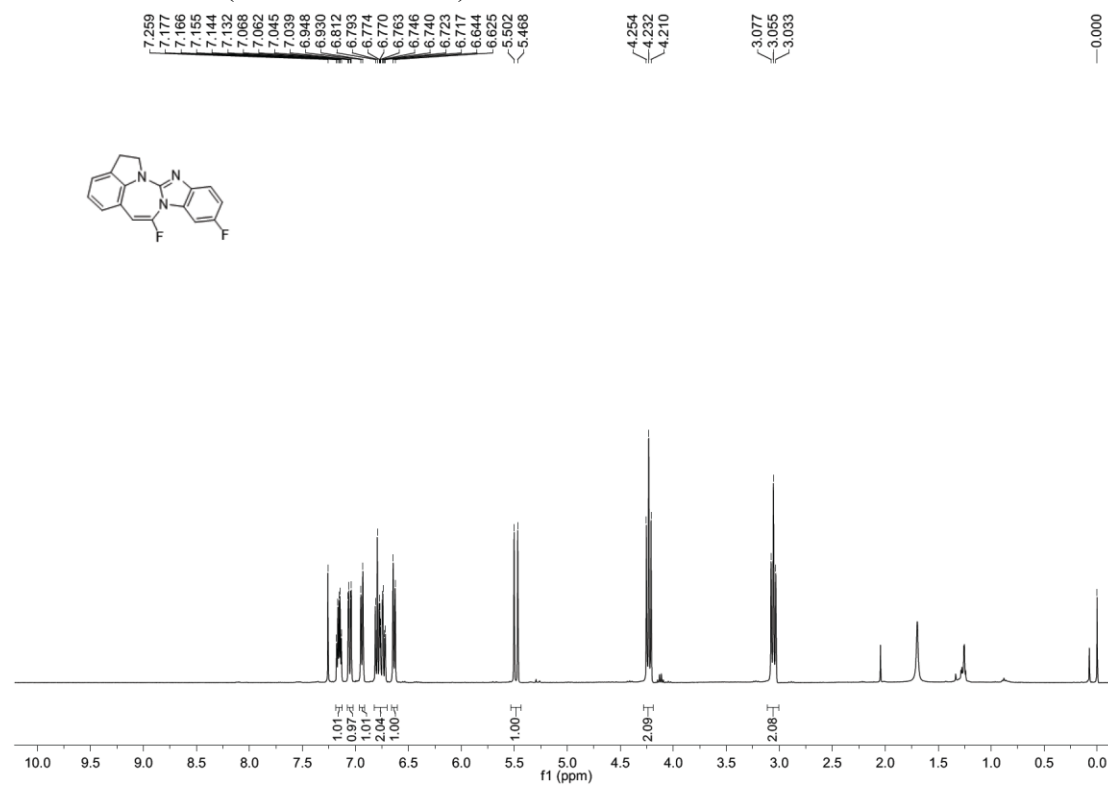

$^{13}\text{C}\{^1\text{H}\}$ -NMR of **3n'** ( $\text{CDCl}_3$ , 100 MHz)

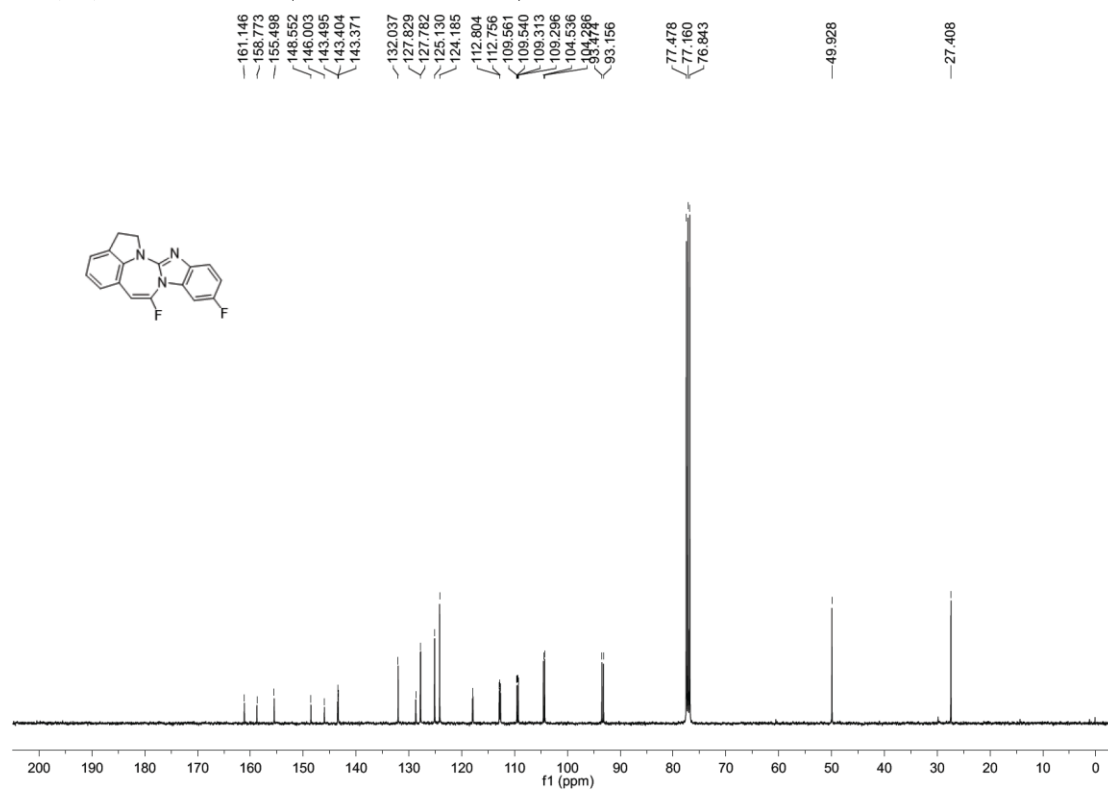

$^{19}\text{F}$ -NMR of **3n'** ( $\text{CDCl}_3$ , 376 MHz)

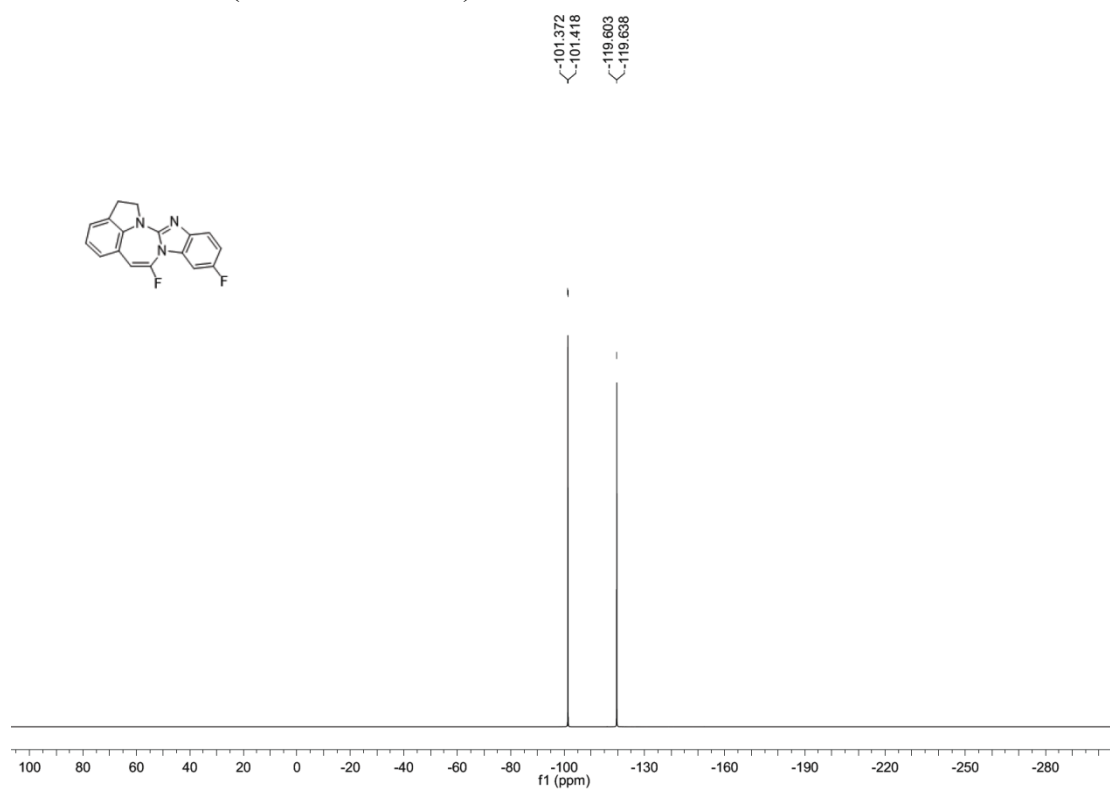

$^1\text{H-NMR}$  of **3o** ( $\text{CDCl}_3$ , 400 MHz)

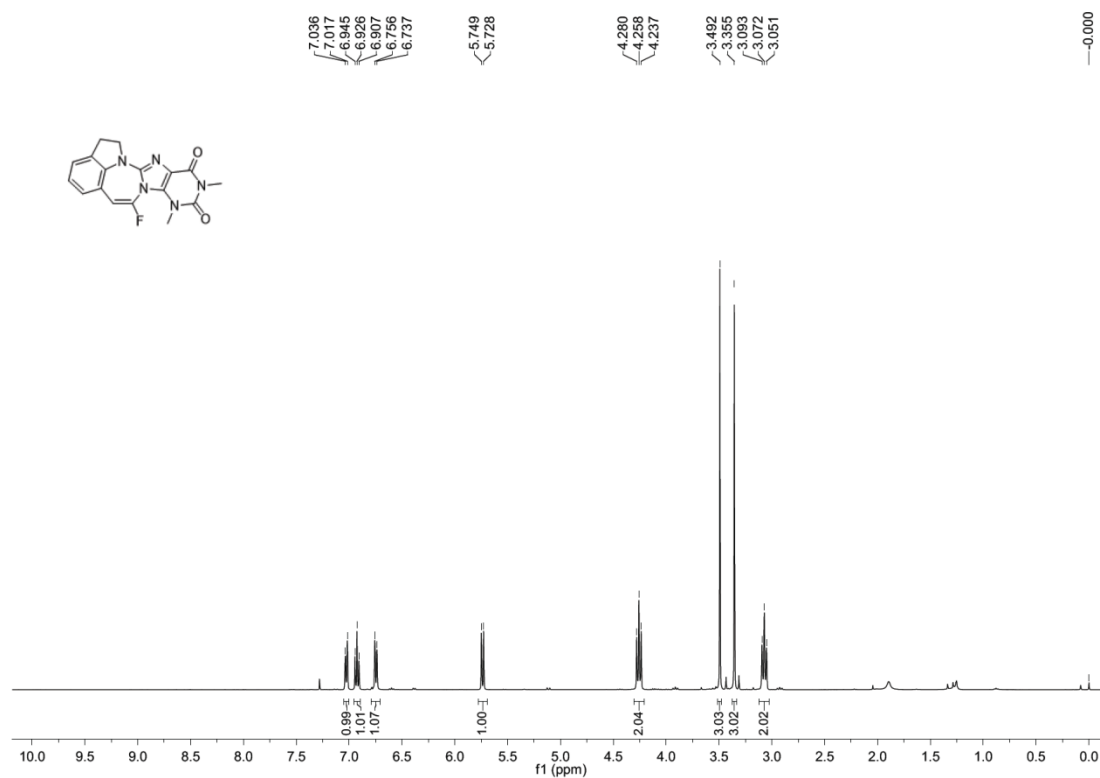

$^{13}\text{C}\{^1\text{H}\}$ -NMR of **3o** ( $\text{CDCl}_3$ , 100 MHz)

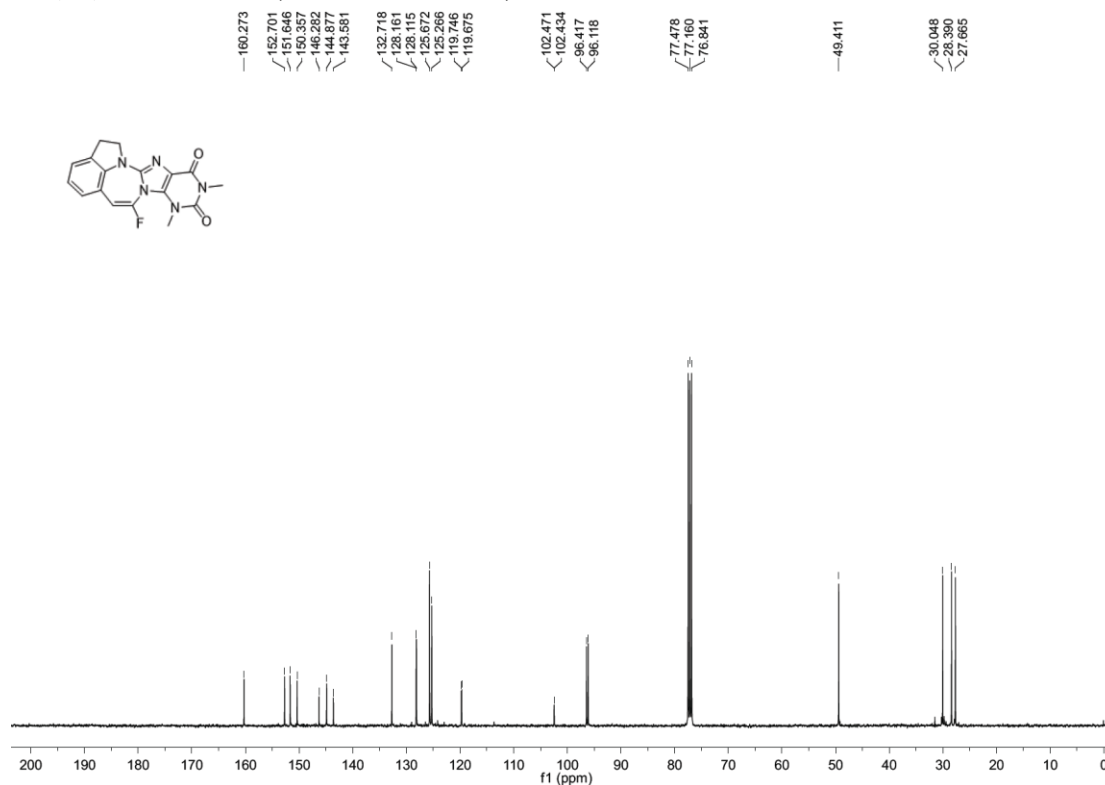

$^{19}\text{F}$ -NMR of **3o** ( $\text{CDCl}_3$ , 376 MHz)

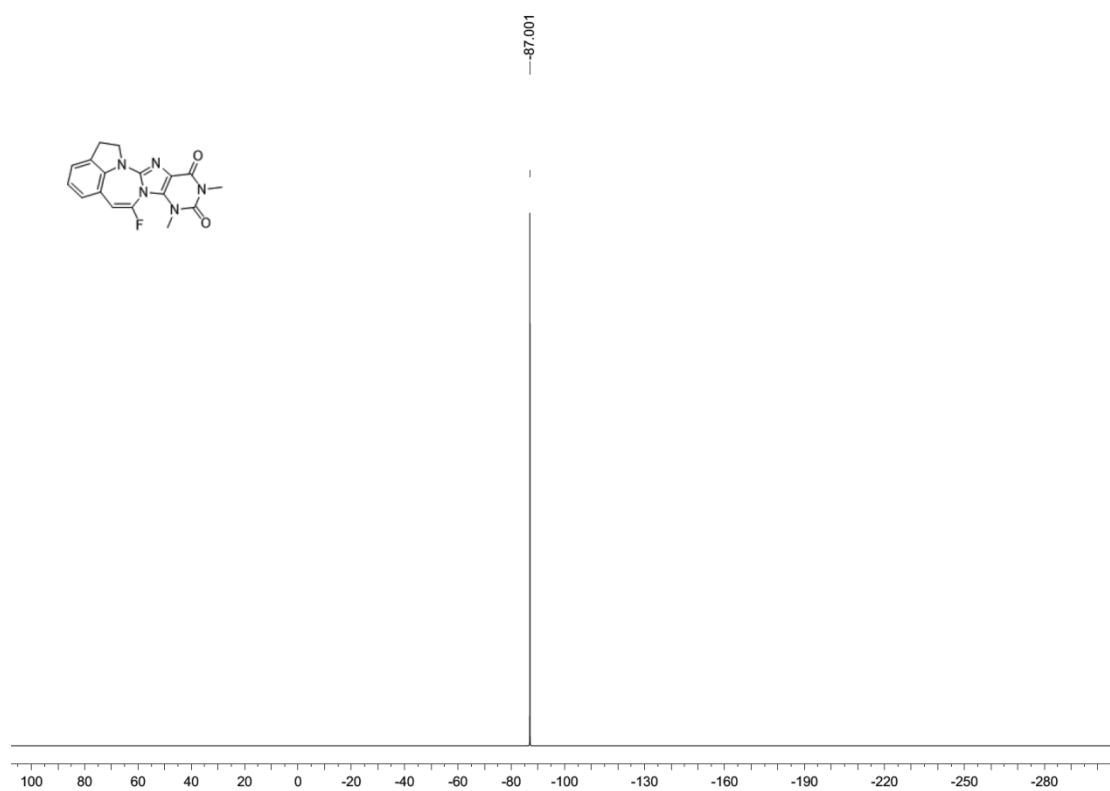

$^1\text{H-NMR}$  of **3p** ( $\text{CDCl}_3$ , 400 MHz)

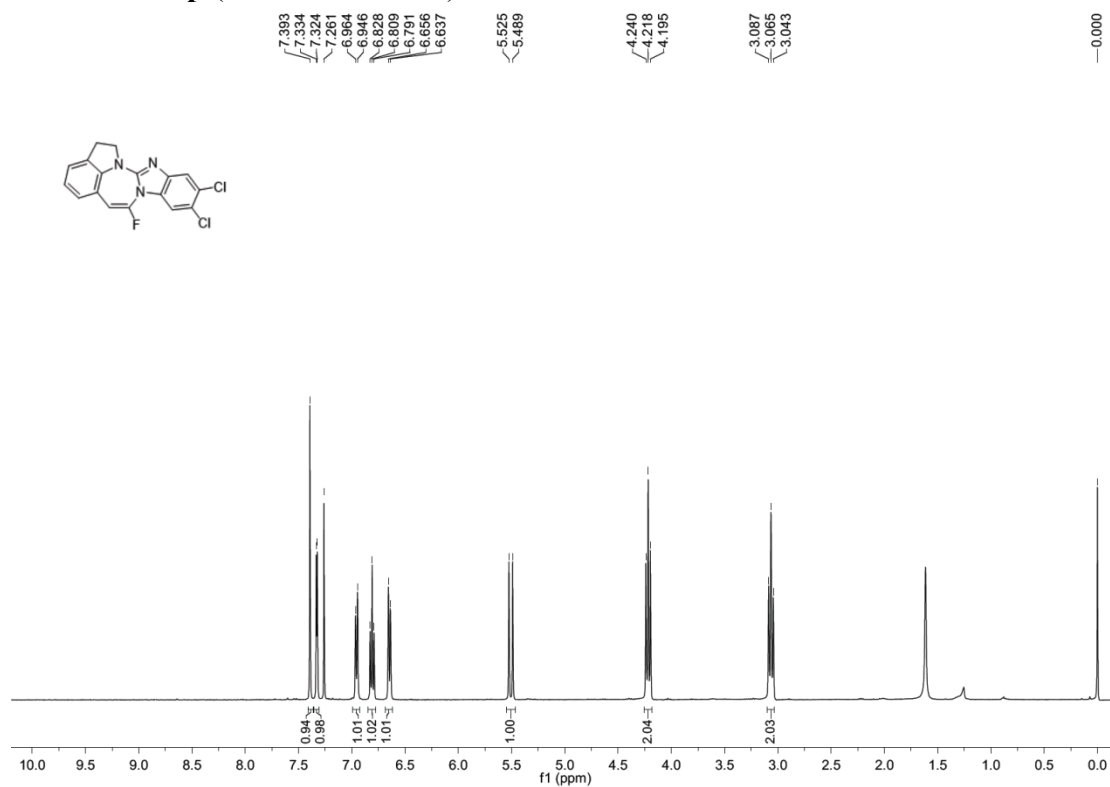

$^{13}\text{C}\{^1\text{H}\}$ -NMR of **3p** ( $\text{CDCl}_3$ , 100 MHz)

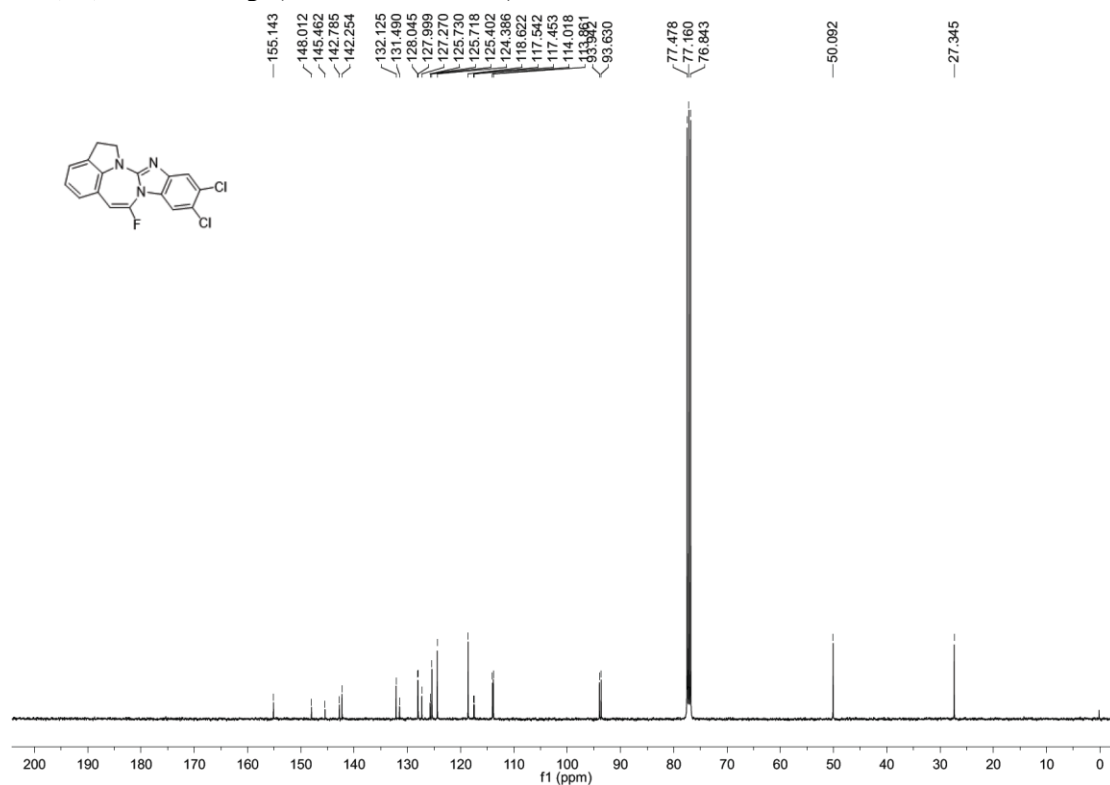

$^{19}\text{F}$ -NMR of **3p** ( $\text{CDCl}_3$ , 376 MHz)

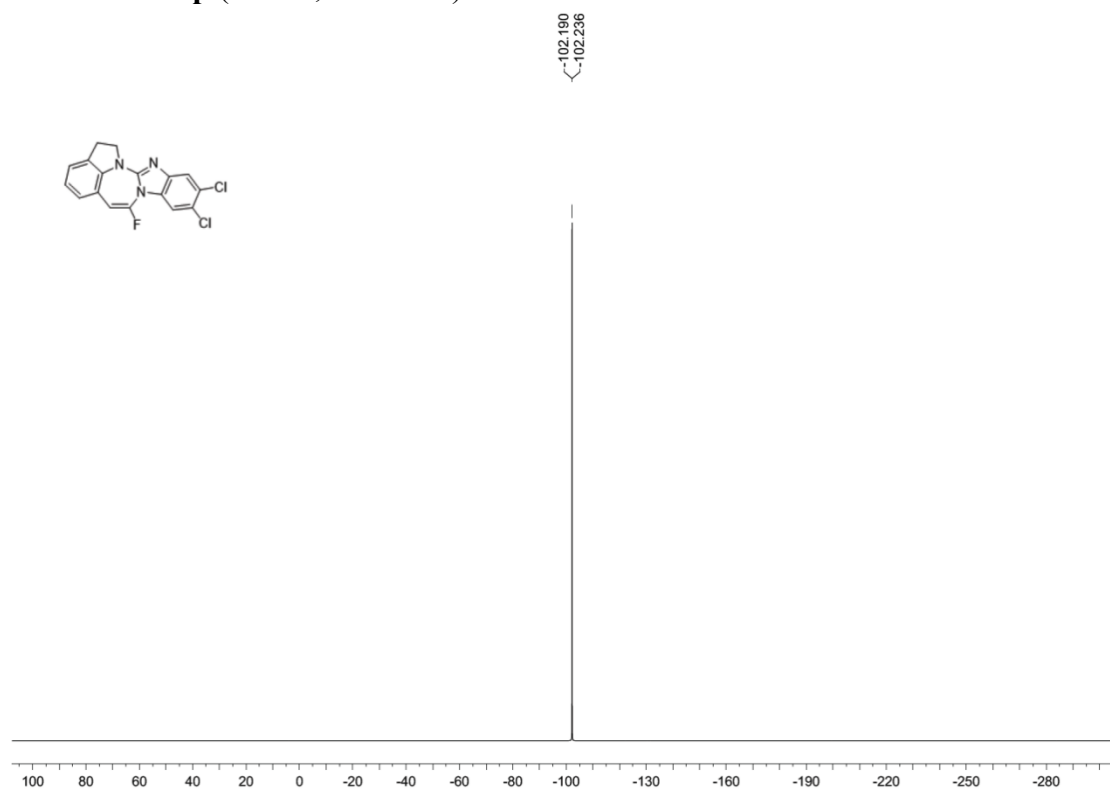



$^1\text{H-NMR}$  of **4a** ( $\text{CDCl}_3$ , 400 MHz)

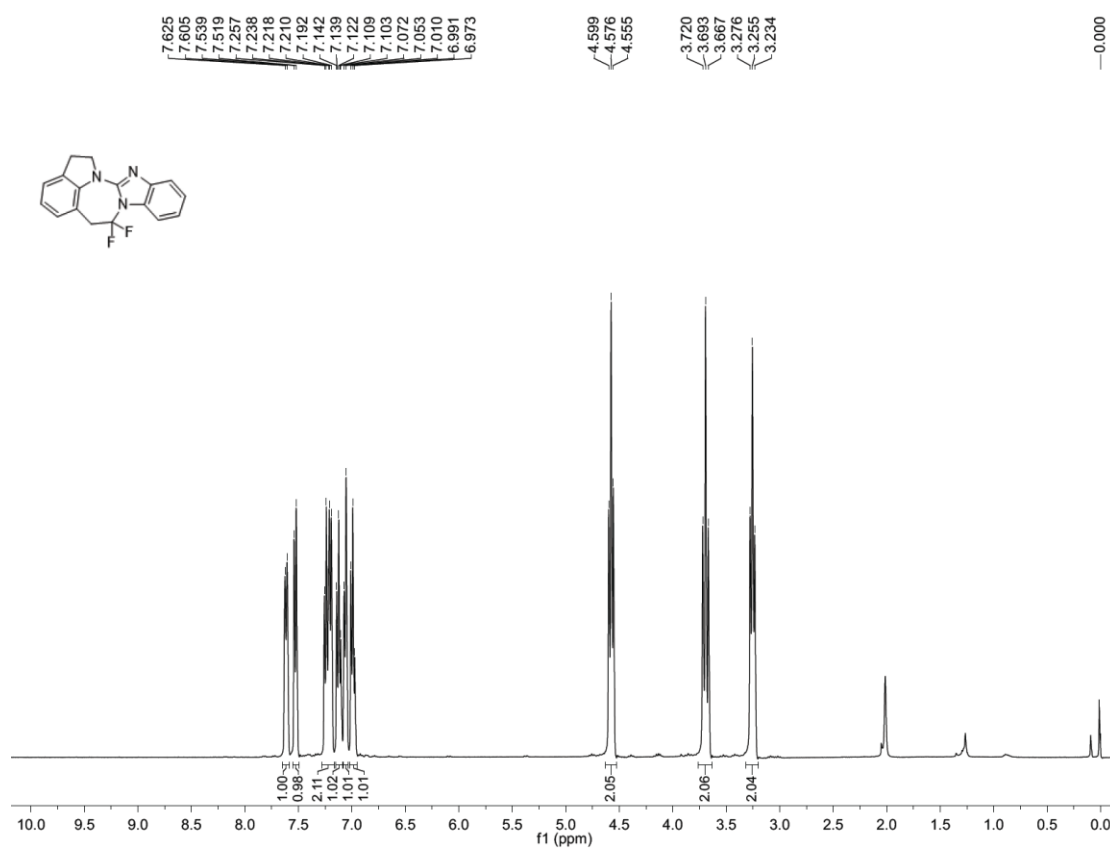

$^{13}\text{C}\{^1\text{H}\}$ -NMR of **4a** ( $\text{CDCl}_3$ , 100 MHz)

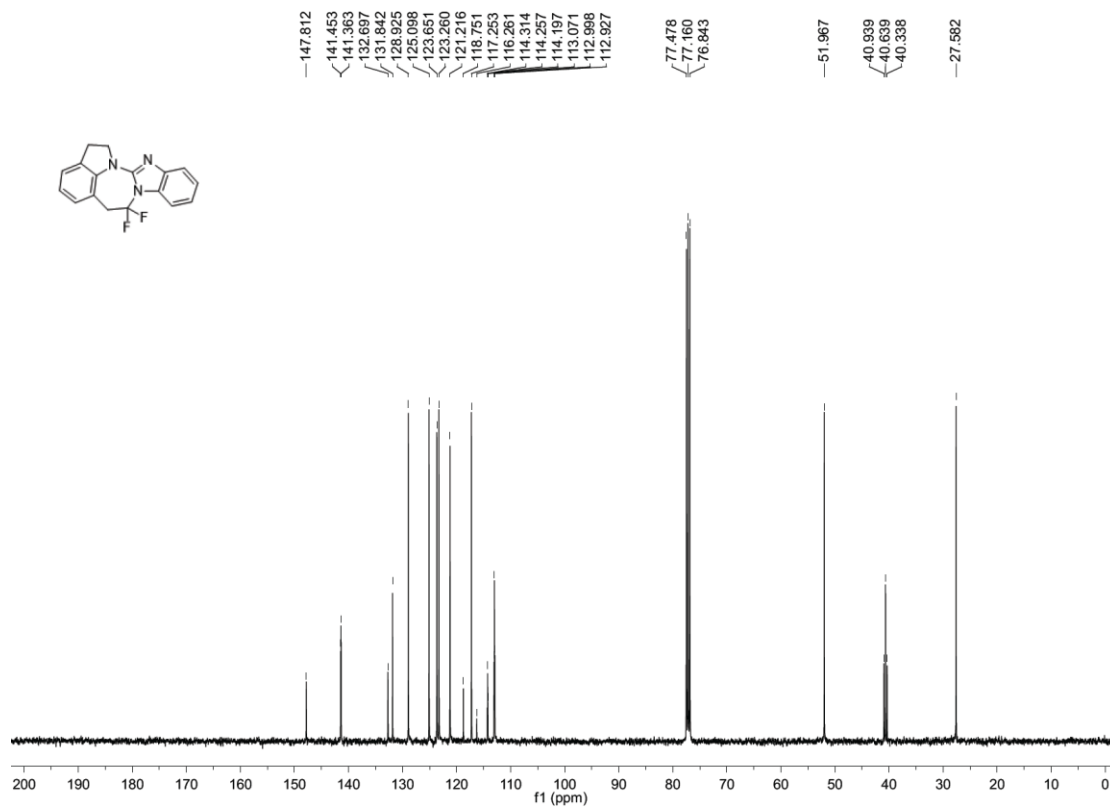

$^{19}\text{F}$ -NMR of **4a** ( $\text{CDCl}_3$ , 376 MHz)

-67.190  
-67.217  
-67.249

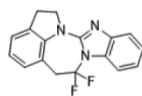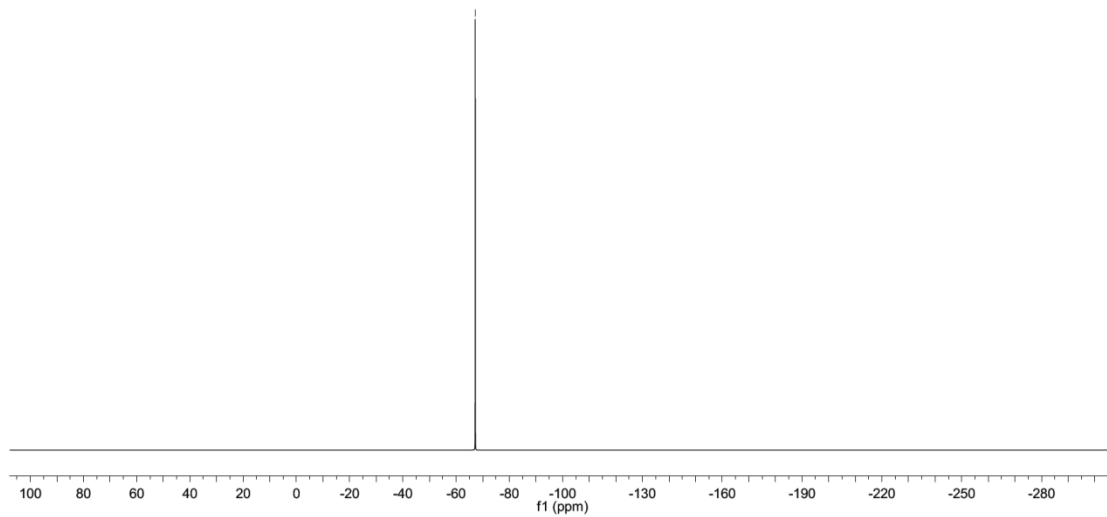

$^1\text{H-NMR}$  of **4b** ( $\text{CDCl}_3$ , 400 MHz)

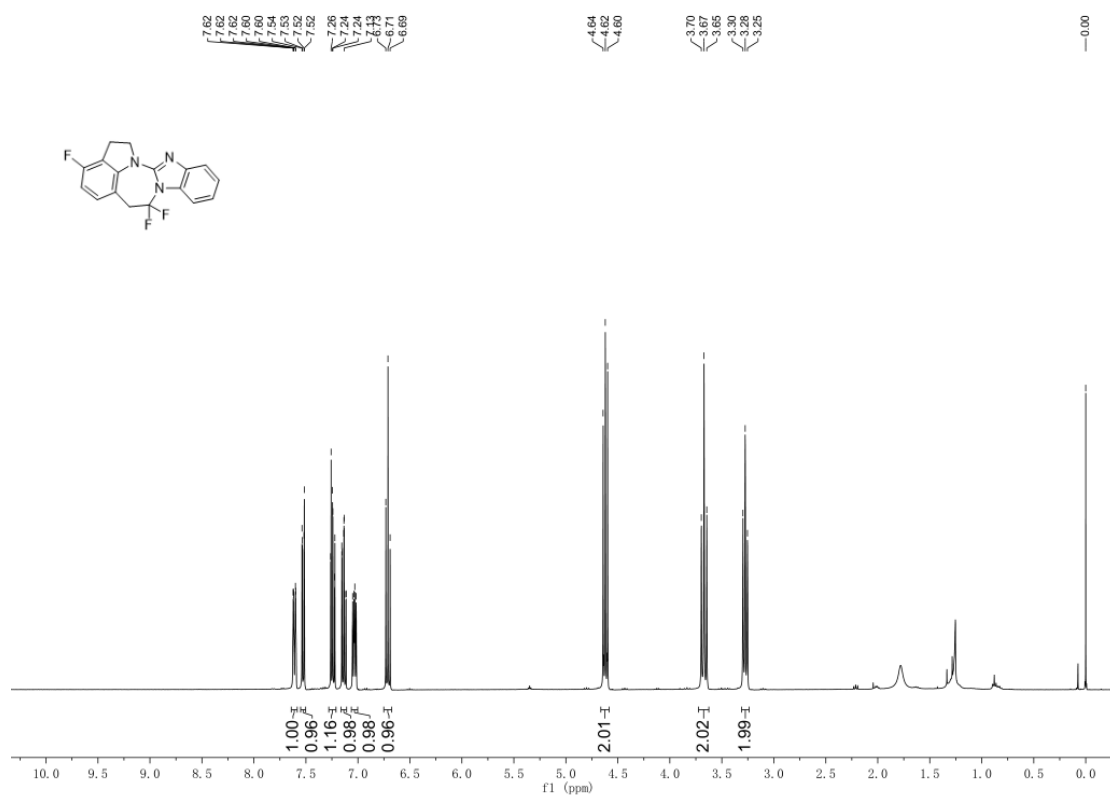

$^{13}\text{C}\{^1\text{H}\}$ -NMR of **4b** ( $\text{CDCl}_3$ , 100 MHz)

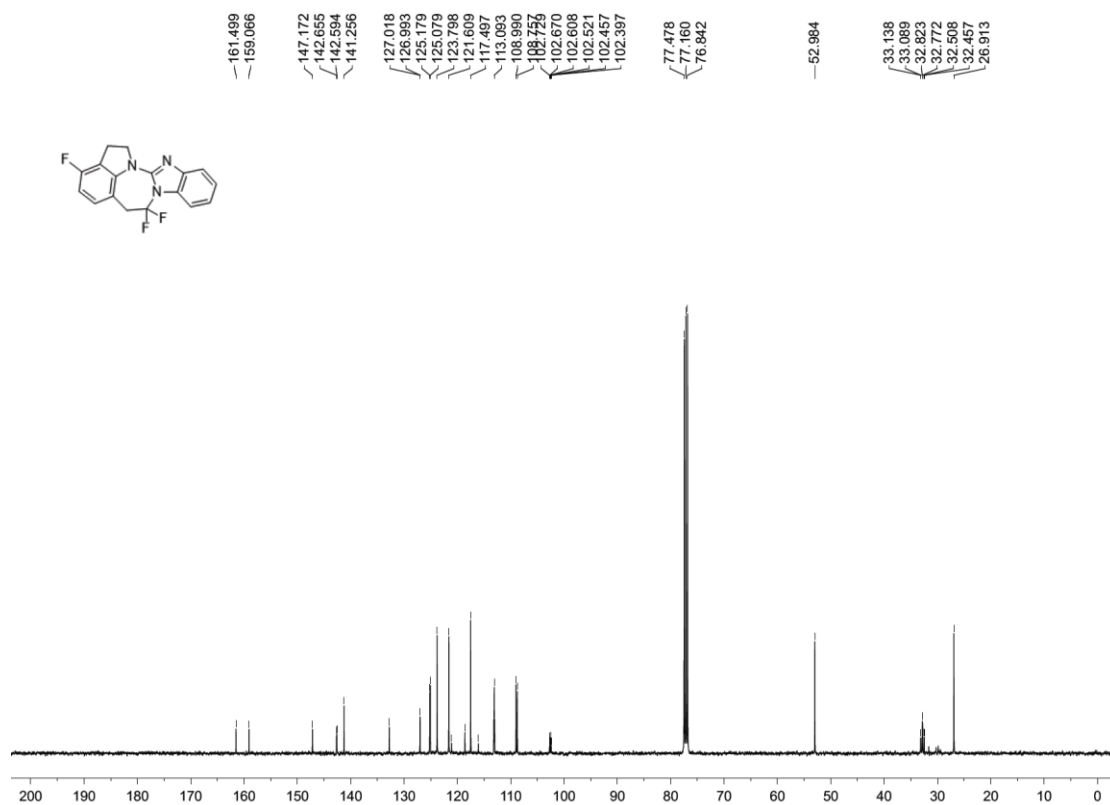

$^{19}\text{F}$ -NMR of **4b** ( $\text{CDCl}_3$ , 376 MHz)

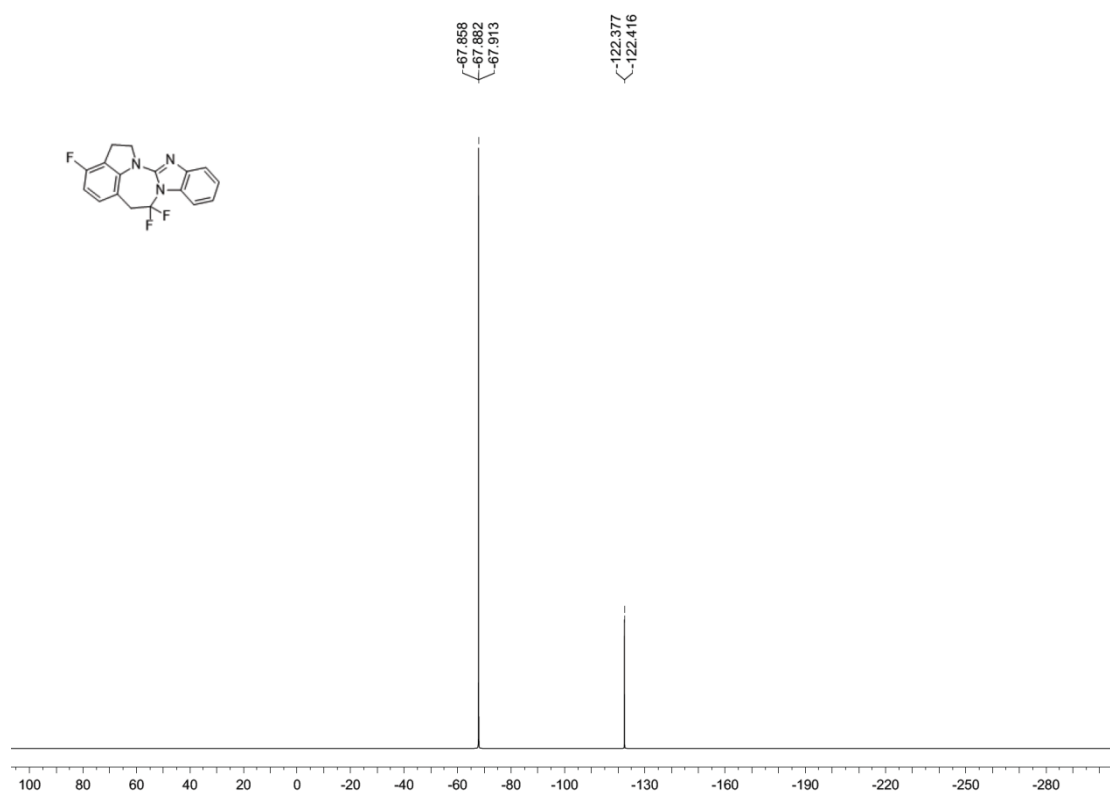

$^1\text{H-NMR}$  of **4c** ( $\text{CDCl}_3$ , 400 MHz)

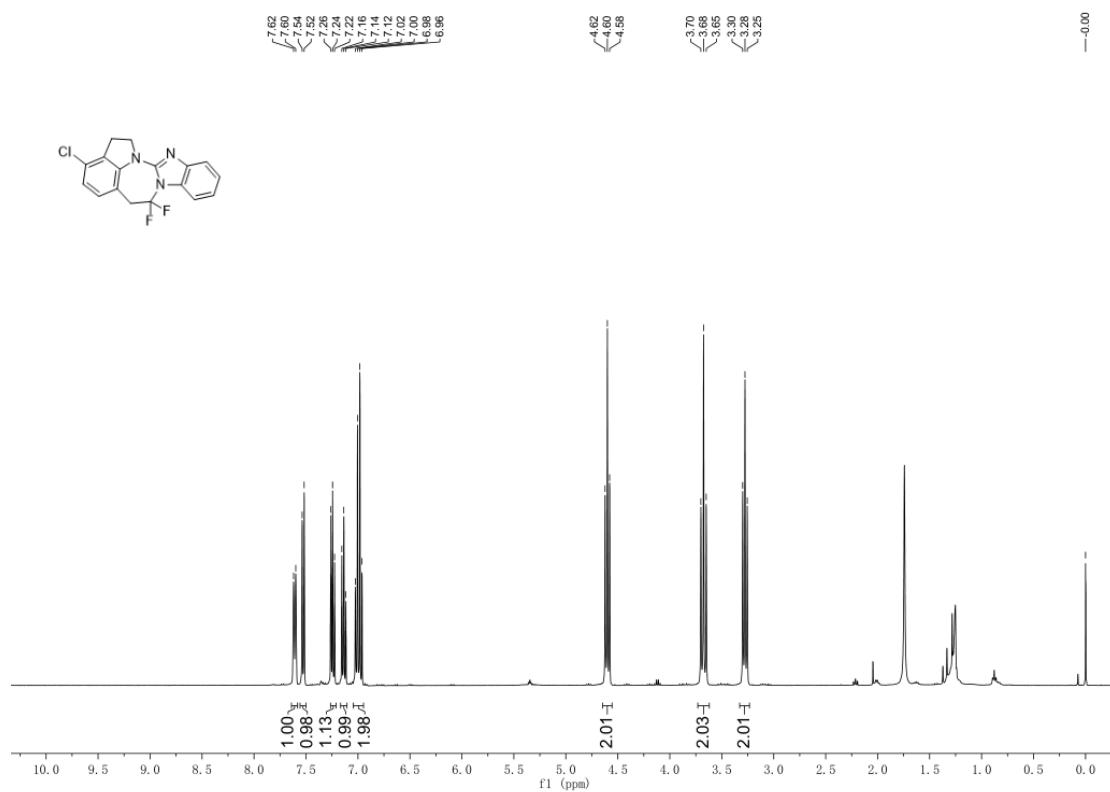

$^{13}\text{C}\{^1\text{H}\}$ -NMR of **4c** ( $\text{CDCl}_3$ , 100 MHz)

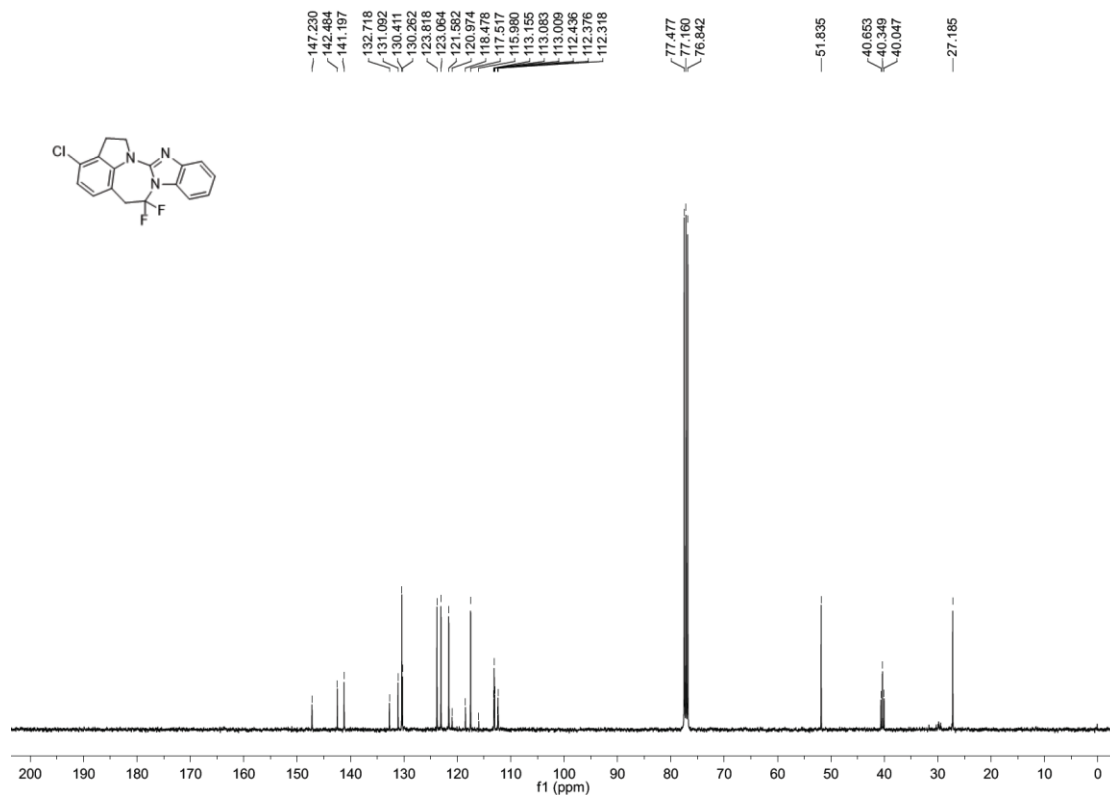

$^{19}\text{F}$ -NMR of **4c** ( $\text{CDCl}_3$ , 376 MHz)

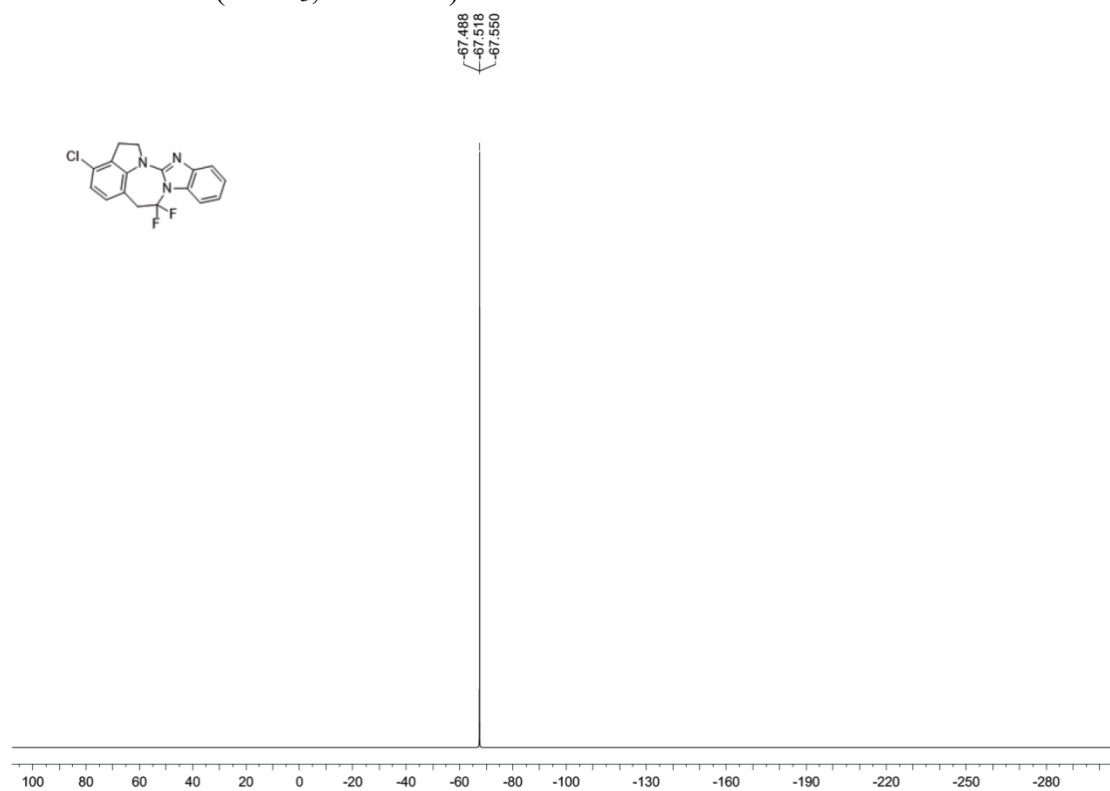

$^1\text{H-NMR}$  of **4d** ( $\text{CDCl}_3$ , 400 MHz)

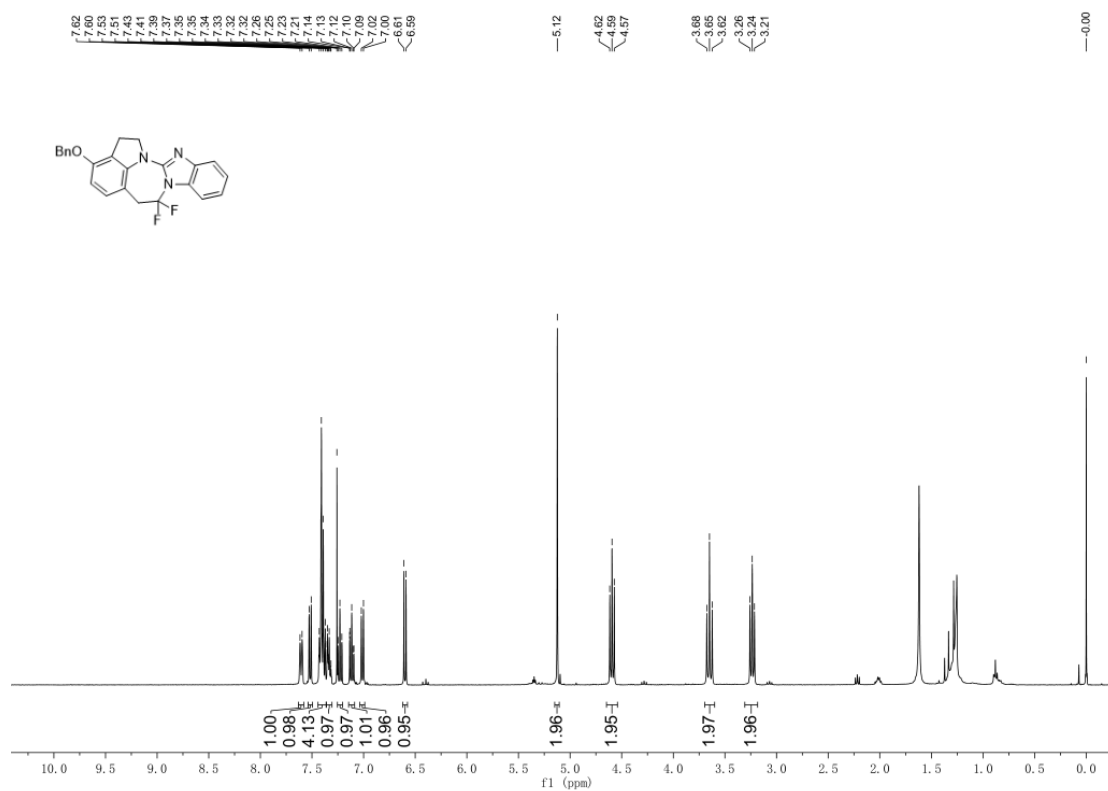

$^{13}\text{C}\{^1\text{H}\}$ -NMR of **4d** ( $\text{CDCl}_3$ , 100 MHz)

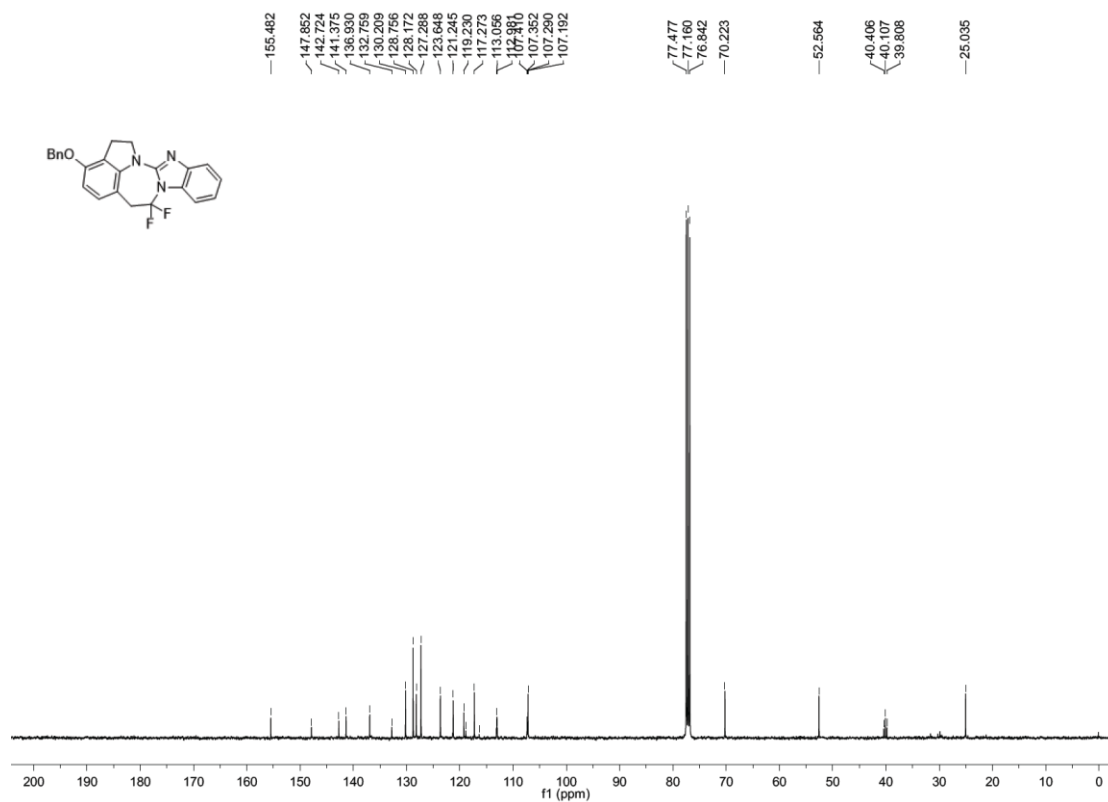

$^{19}\text{F}$ -NMR of **4d** ( $\text{CDCl}_3$ , 376 MHz)

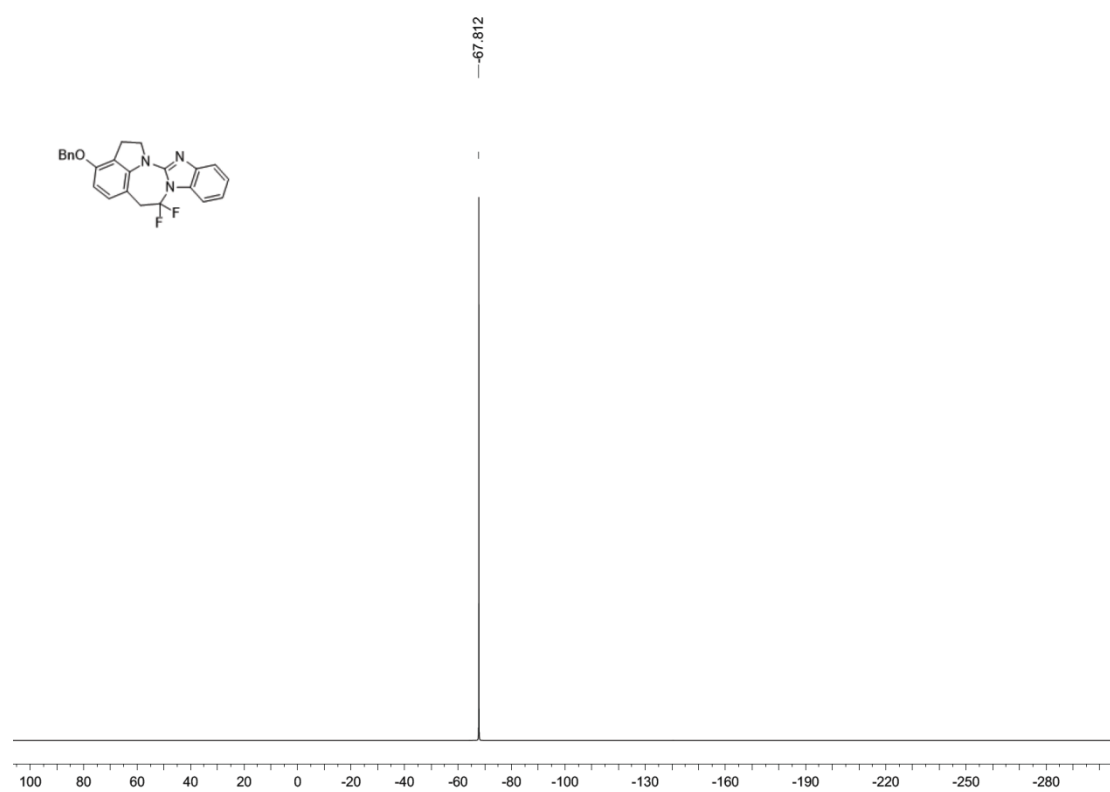



$^1\text{H-NMR}$  of **4e** ( $\text{CDCl}_3$ , 400 MHz)

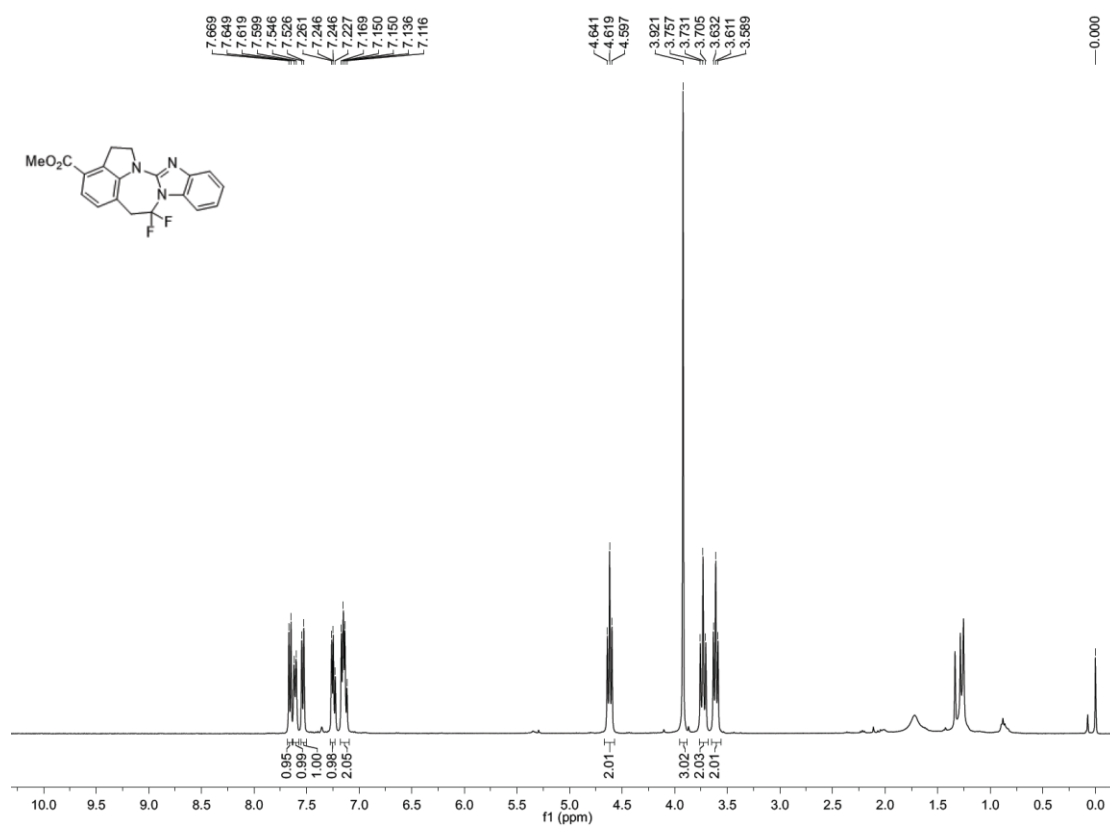

$^{13}\text{C}\{^1\text{H}\}$ -NMR of **4e** ( $\text{CDCl}_3$ , 100 MHz)

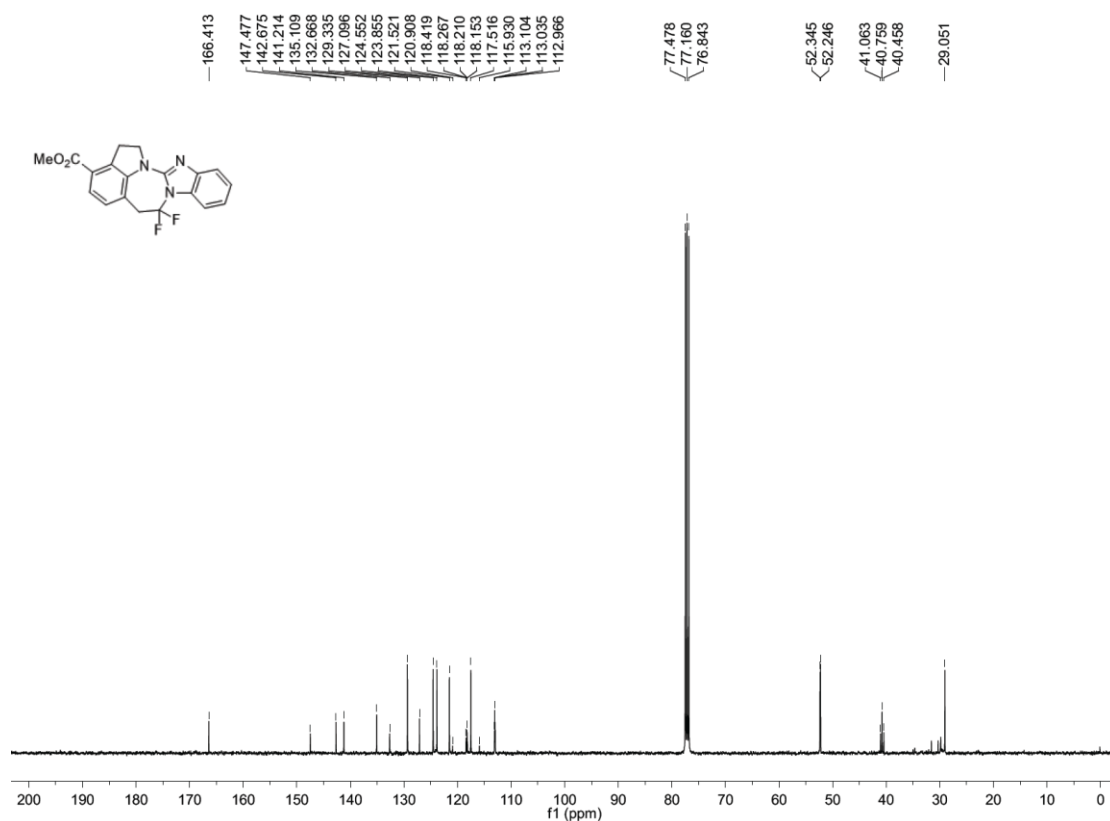

$^{19}\text{F}$ -NMR of **4e** ( $\text{CDCl}_3$ , 376 MHz)

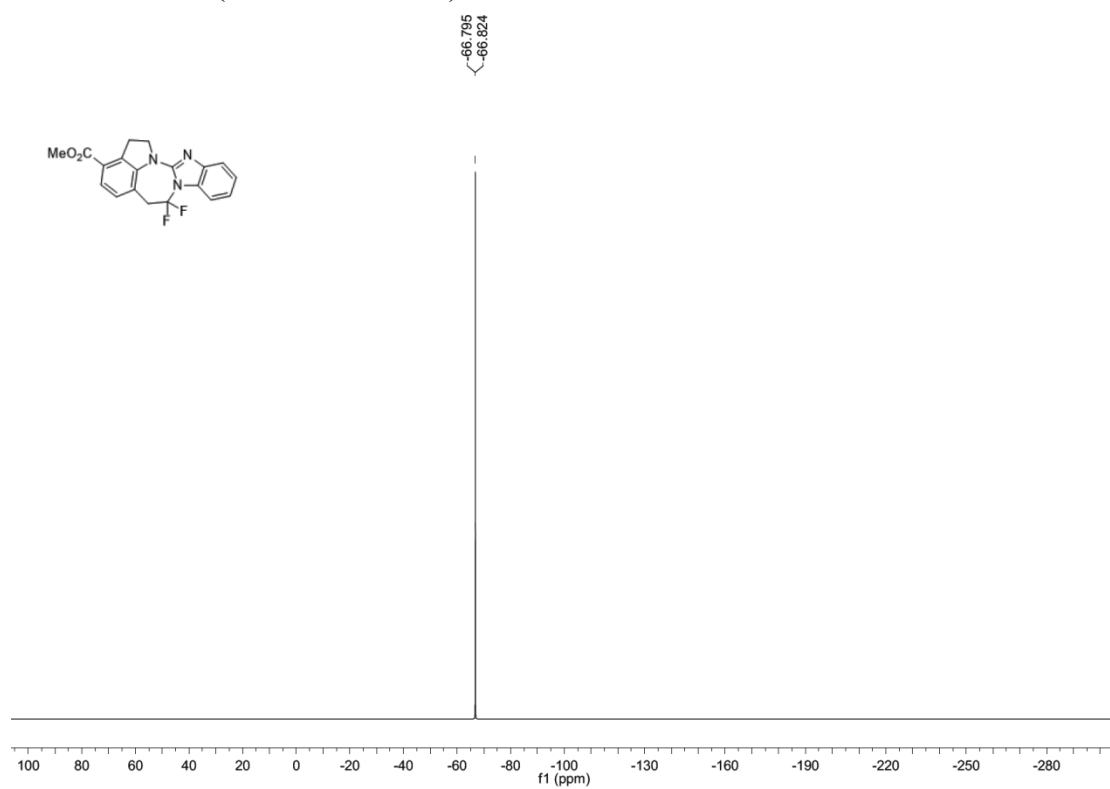

$^1\text{H-NMR}$  of **4f** ( $\text{CDCl}_3$ , 400 MHz)

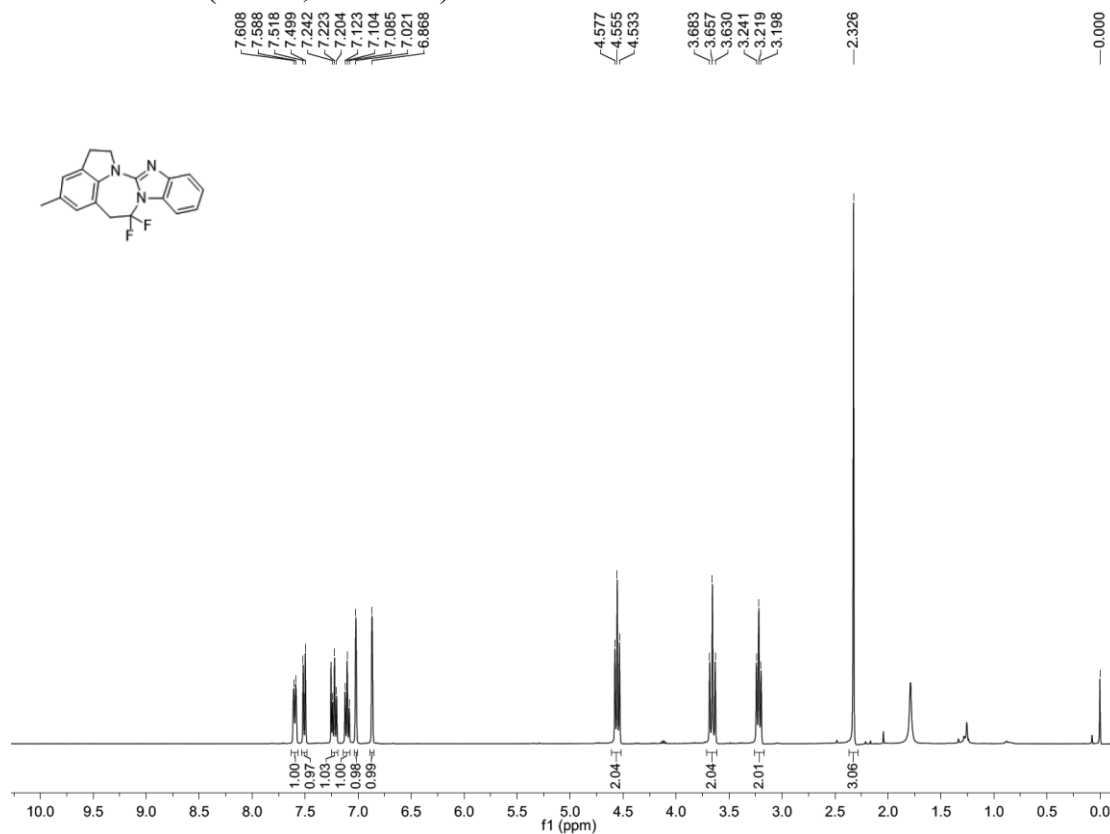

$^{13}\text{C}\{^1\text{H}\}$ -NMR of **4f** ( $\text{CDCl}_3$ , 100 MHz)

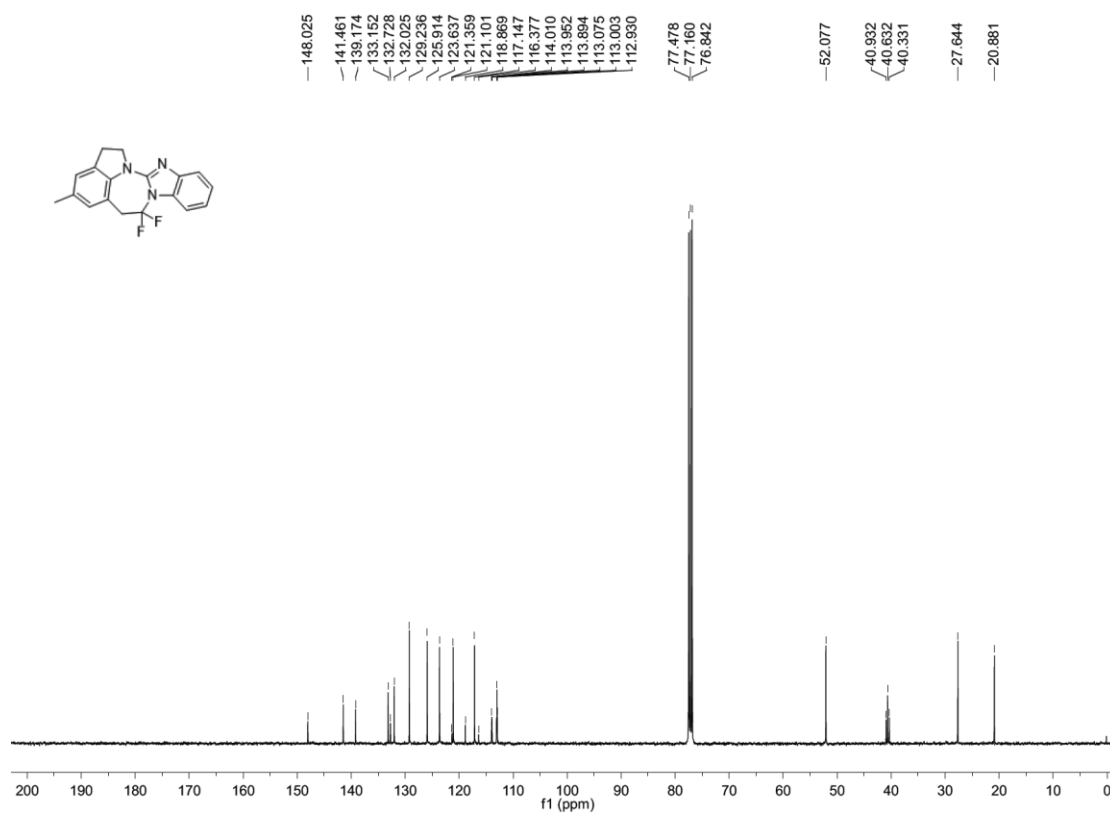

$^{19}\text{F}$ -NMR of **4f** ( $\text{CDCl}_3$ , 376 MHz)

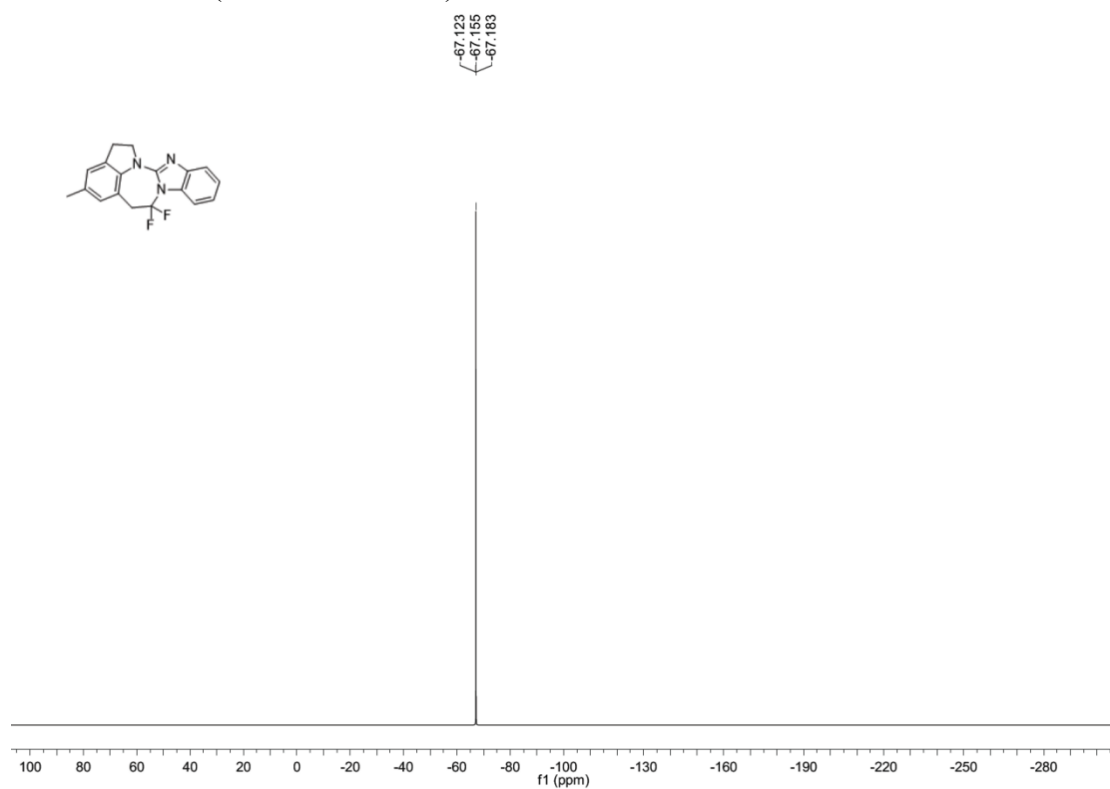

$^1\text{H-NMR}$  of **4g** ( $\text{CDCl}_3$ , 400 MHz)

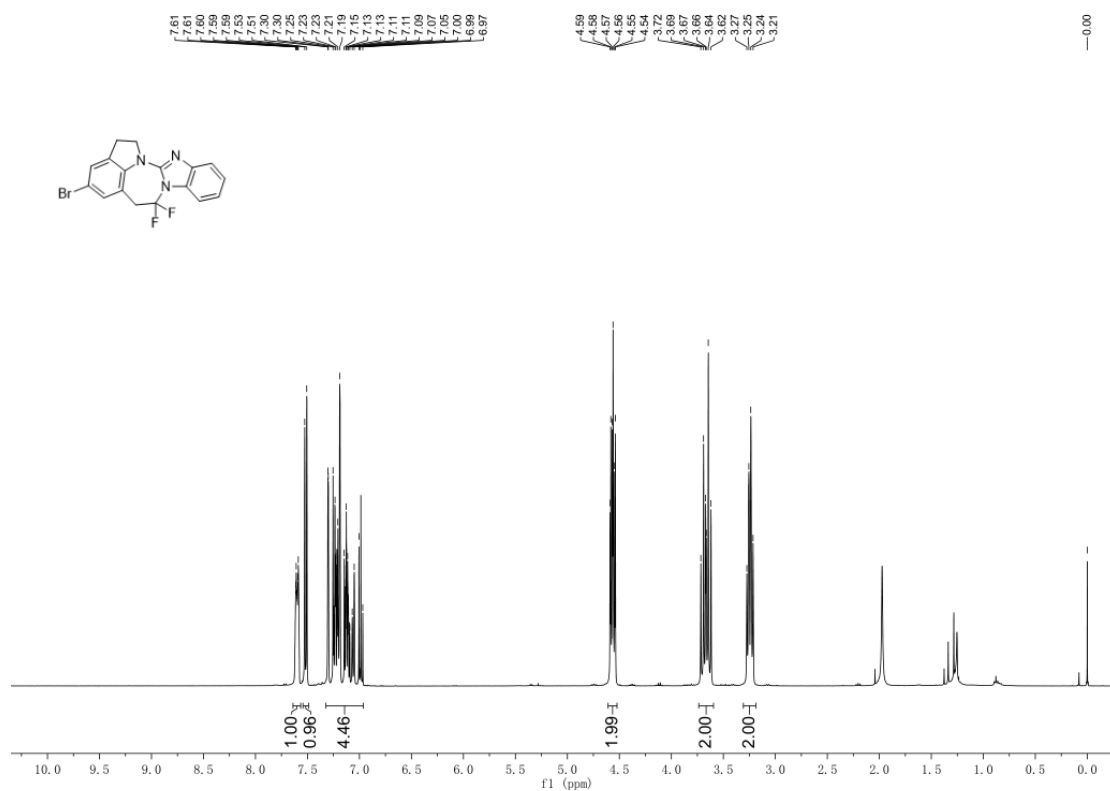

$^{13}\text{C}\{^1\text{H}\}$ -NMR of **4g** ( $\text{CDCl}_3$ , 100 MHz)

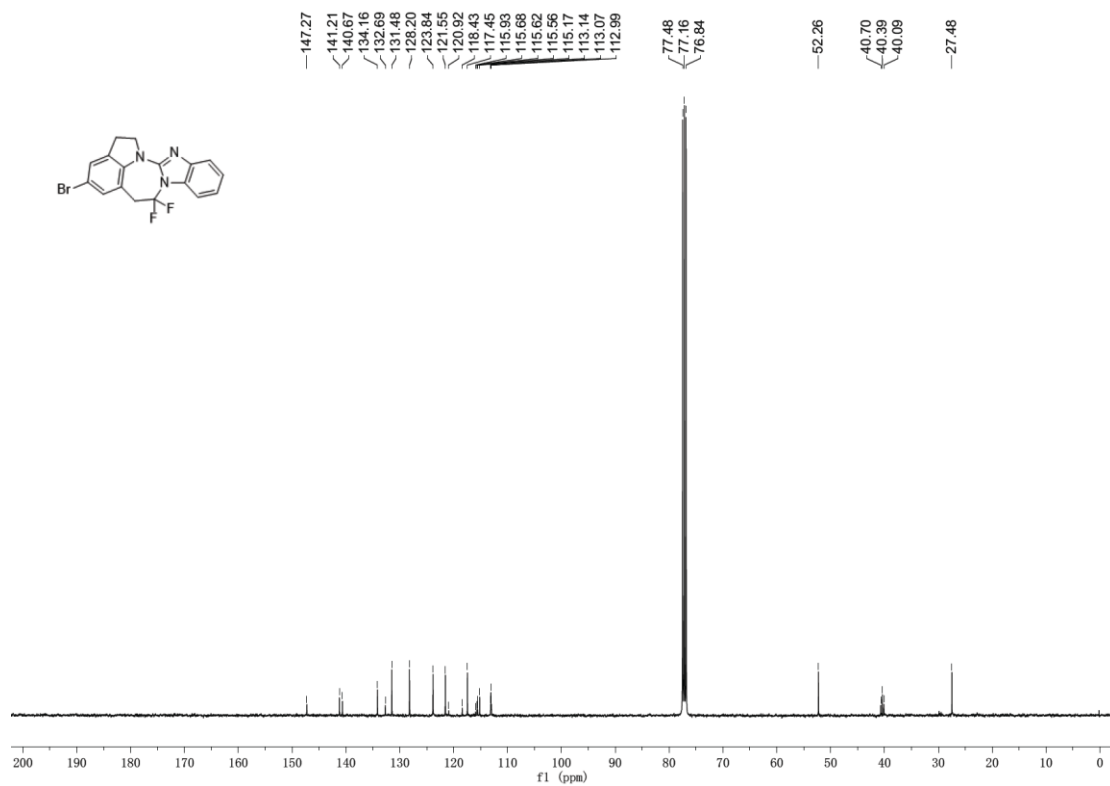

$^{19}\text{F}$ -NMR of **4g** ( $\text{CDCl}_3$ , 376 MHz)

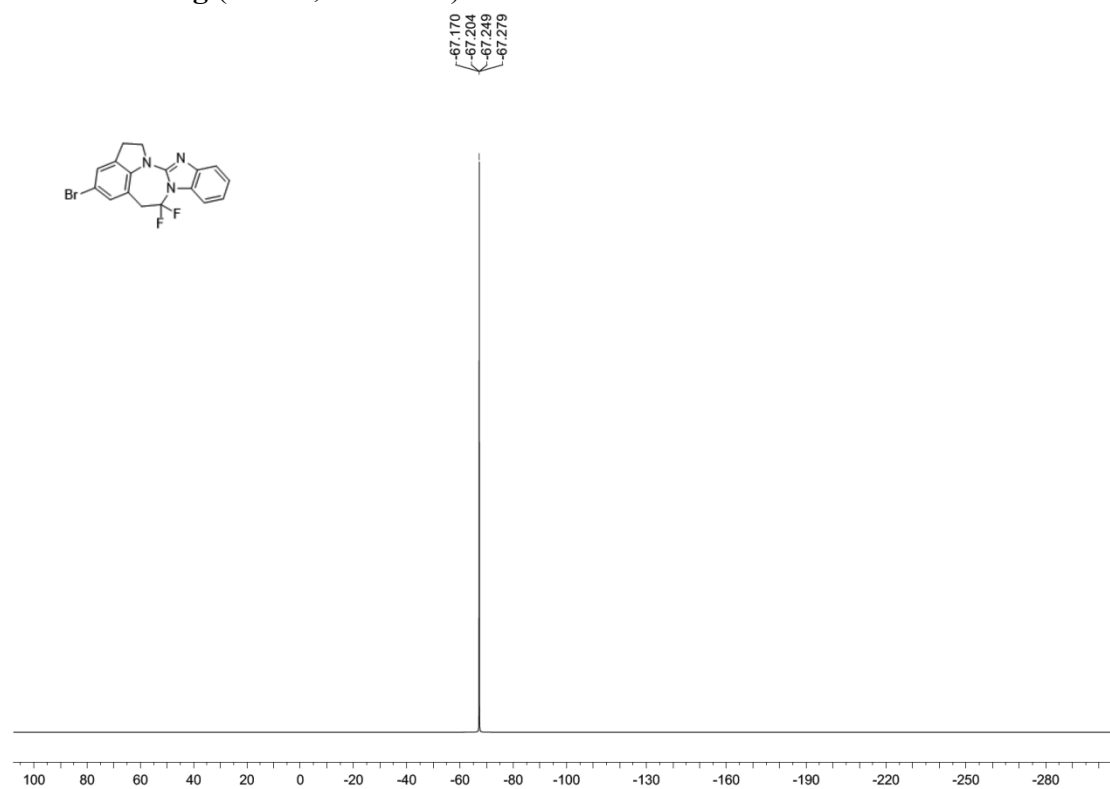

$^1\text{H-NMR}$  of **4h** ( $\text{CDCl}_3$ , 400 MHz)

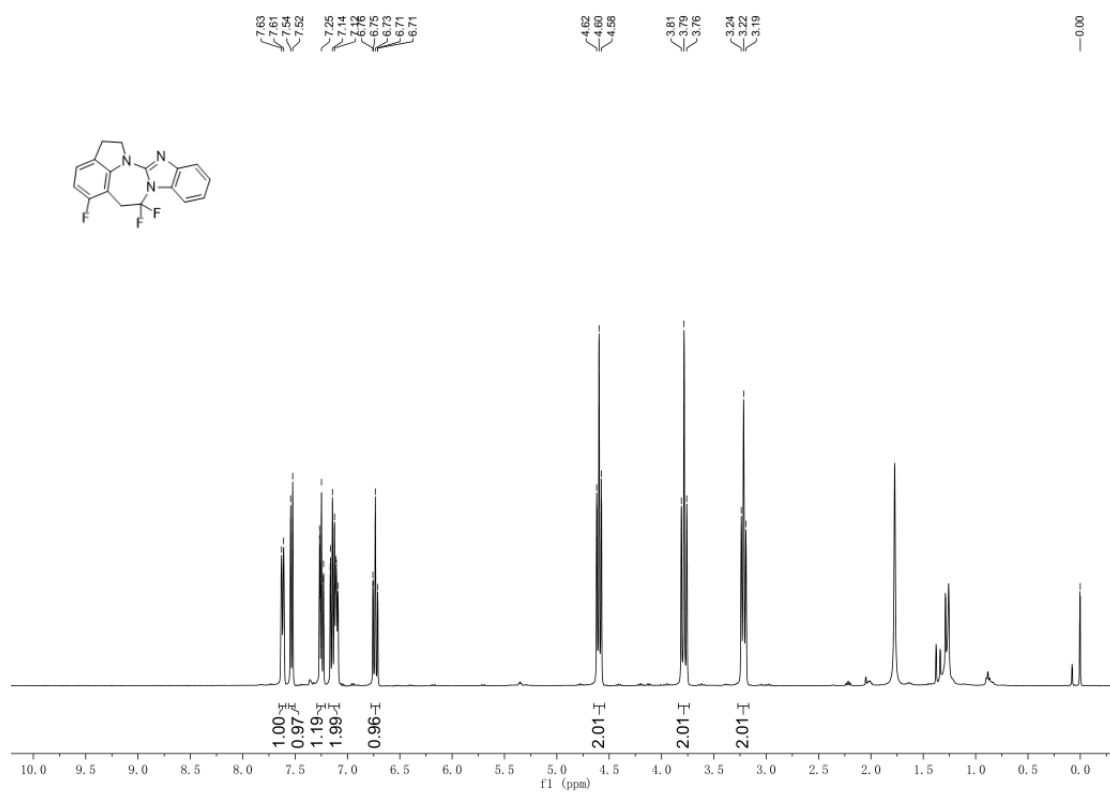

$^{13}\text{C}\{^1\text{H}\}$ -NMR of **4h** ( $\text{CDCl}_3$ , 100 MHz)

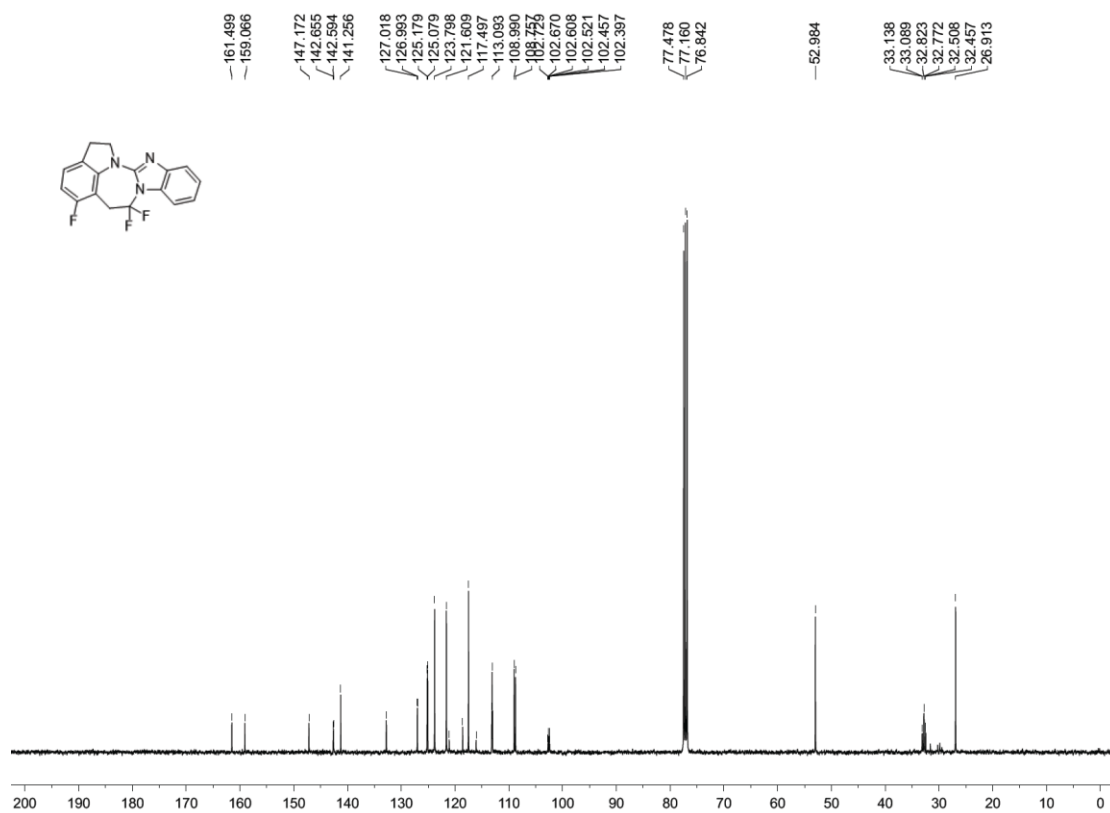

$^{19}\text{F}$ -NMR of **4h** ( $\text{CDCl}_3$ , 376 MHz)

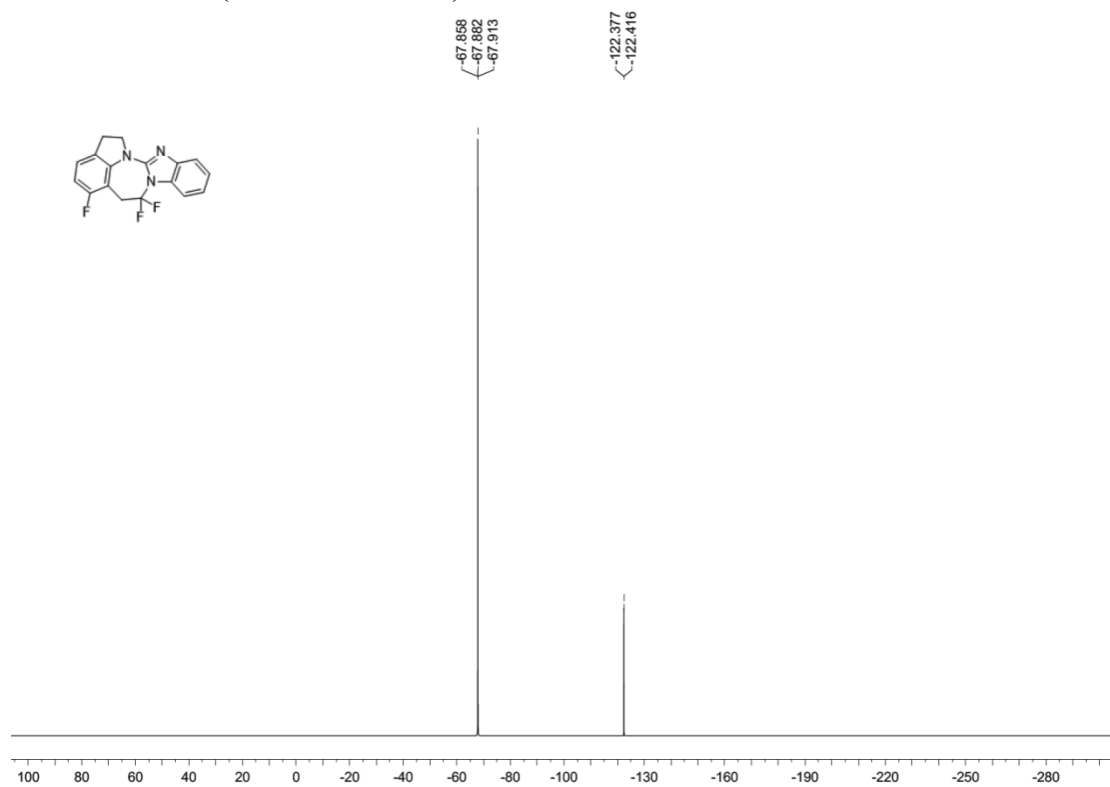



$^1\text{H-NMR}$  of **4i** ( $\text{CDCl}_3$ , 400 MHz)

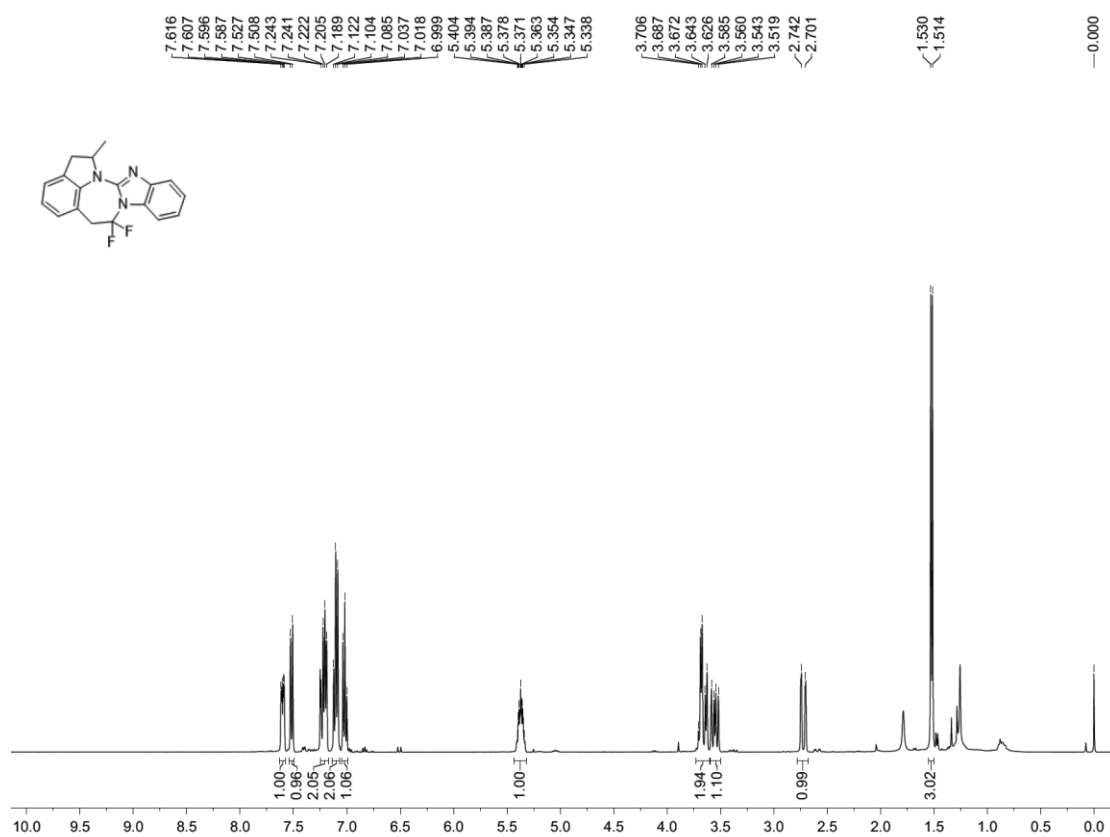

$^{13}\text{C}\{^1\text{H}\}$ -NMR of **4i** ( $\text{CDCl}_3$ , 100 MHz)

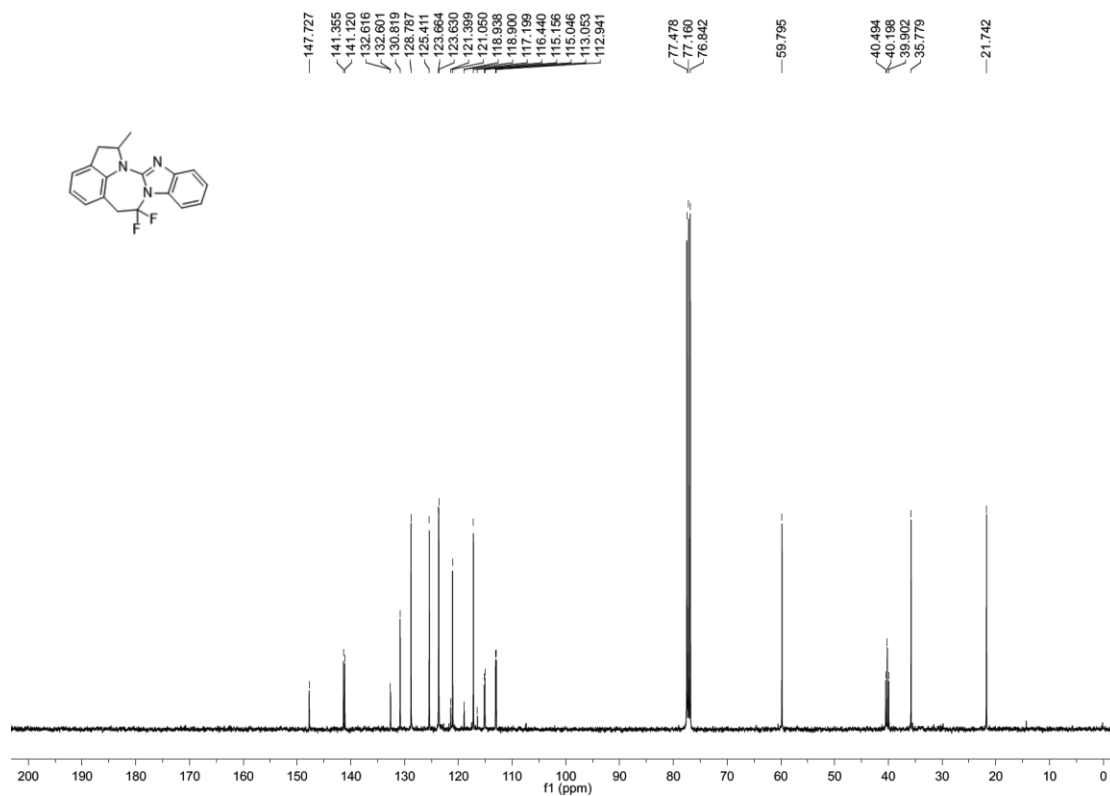

$^{19}\text{F}$ -NMR of **4i** ( $\text{CDCl}_3$ , 376 MHz)

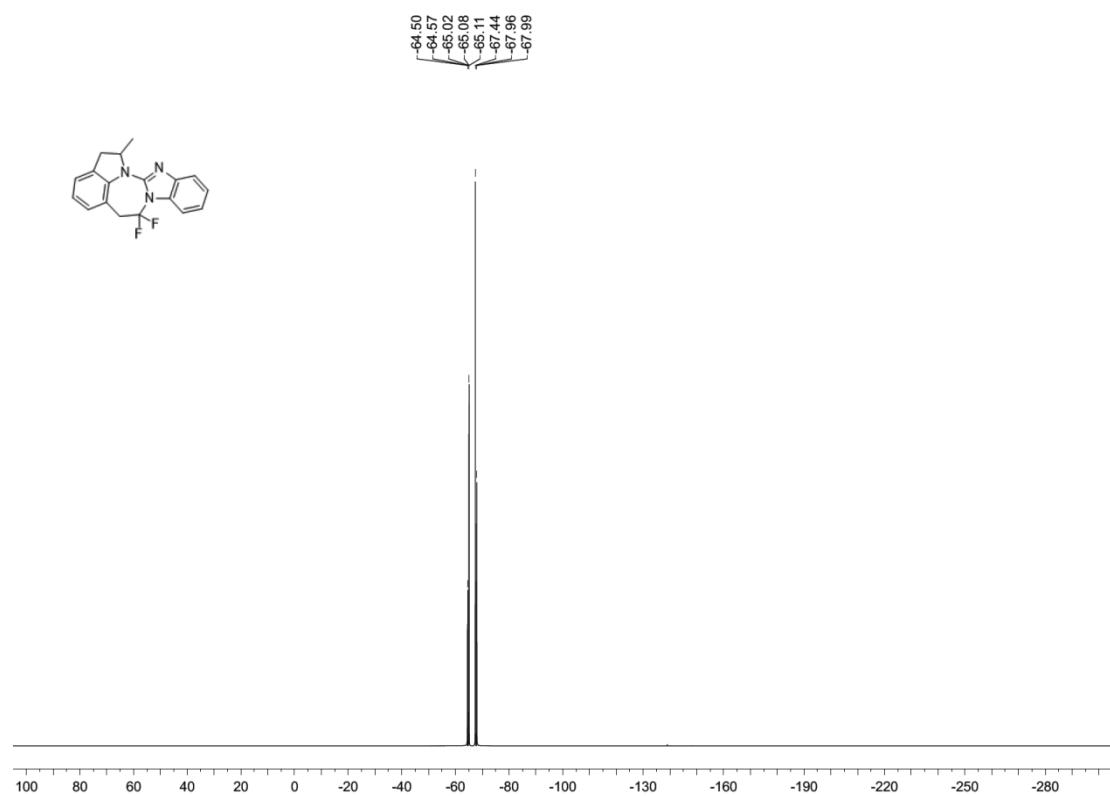

$^1\text{H-NMR}$  of **7** ( $\text{CD}_3\text{OD}$ , 400 MHz)

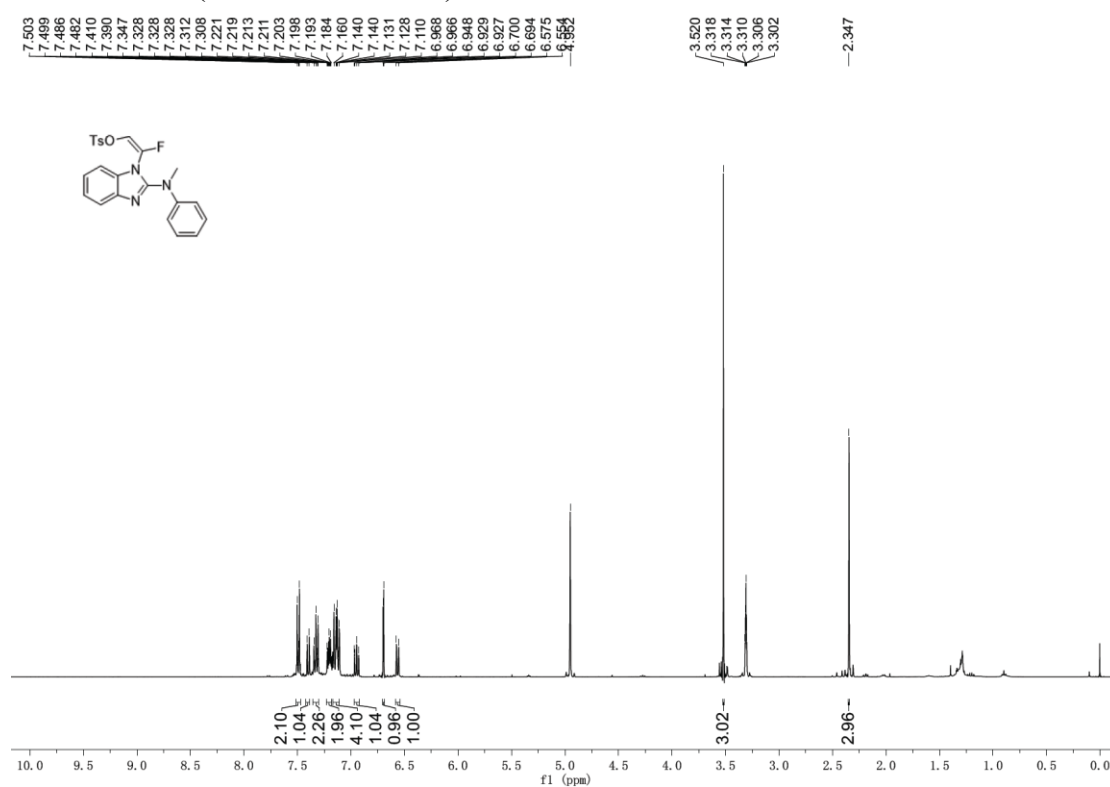

$^{13}\text{C}\{^1\text{H}\}$ -NMR of **7** ( $\text{CDCl}_3$ , 100 MHz)

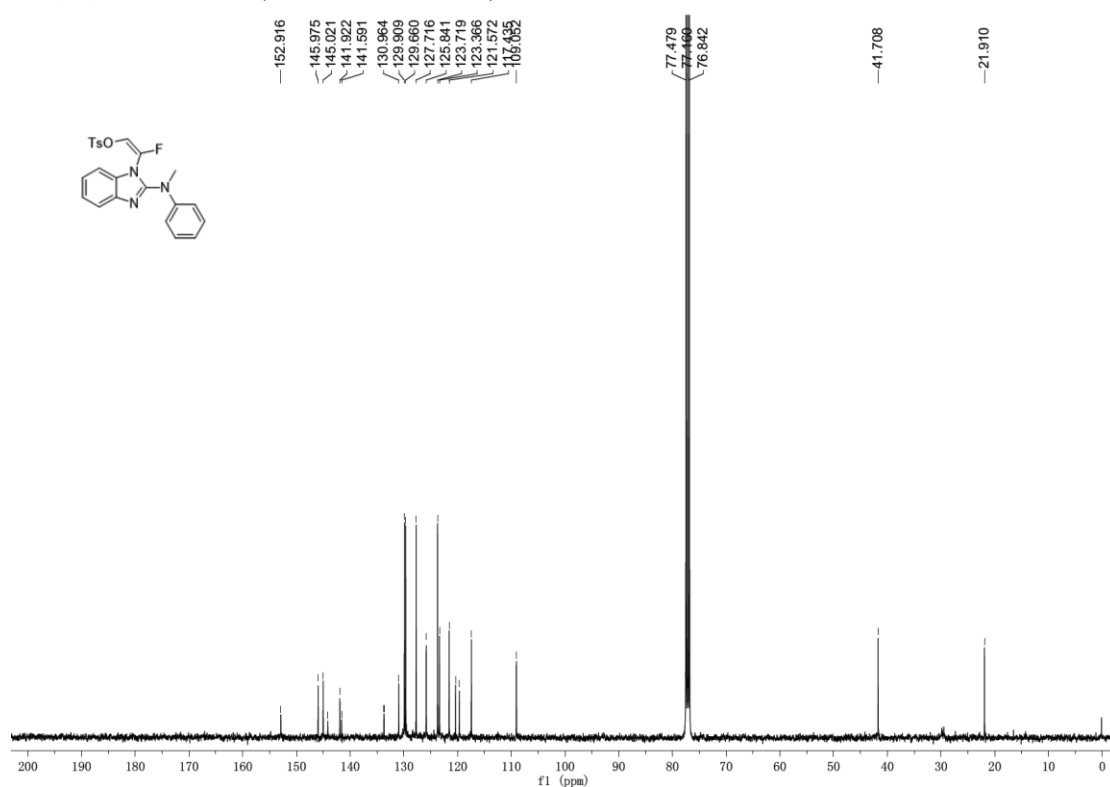

$^{19}\text{F}$ -NMR of 7 ( $\text{CDCl}_3$ , 376 MHz)

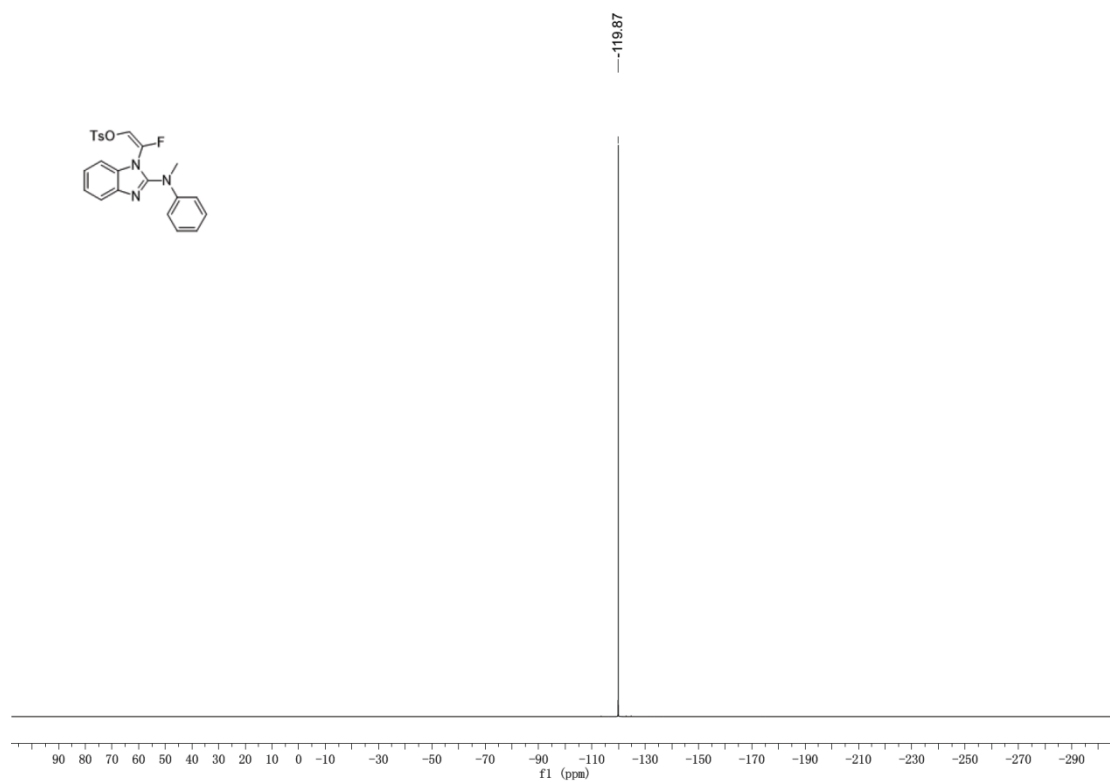

$^1\text{H-NMR}$  of **8** ( $\text{CD}_3\text{OD}$ , 400 MHz)

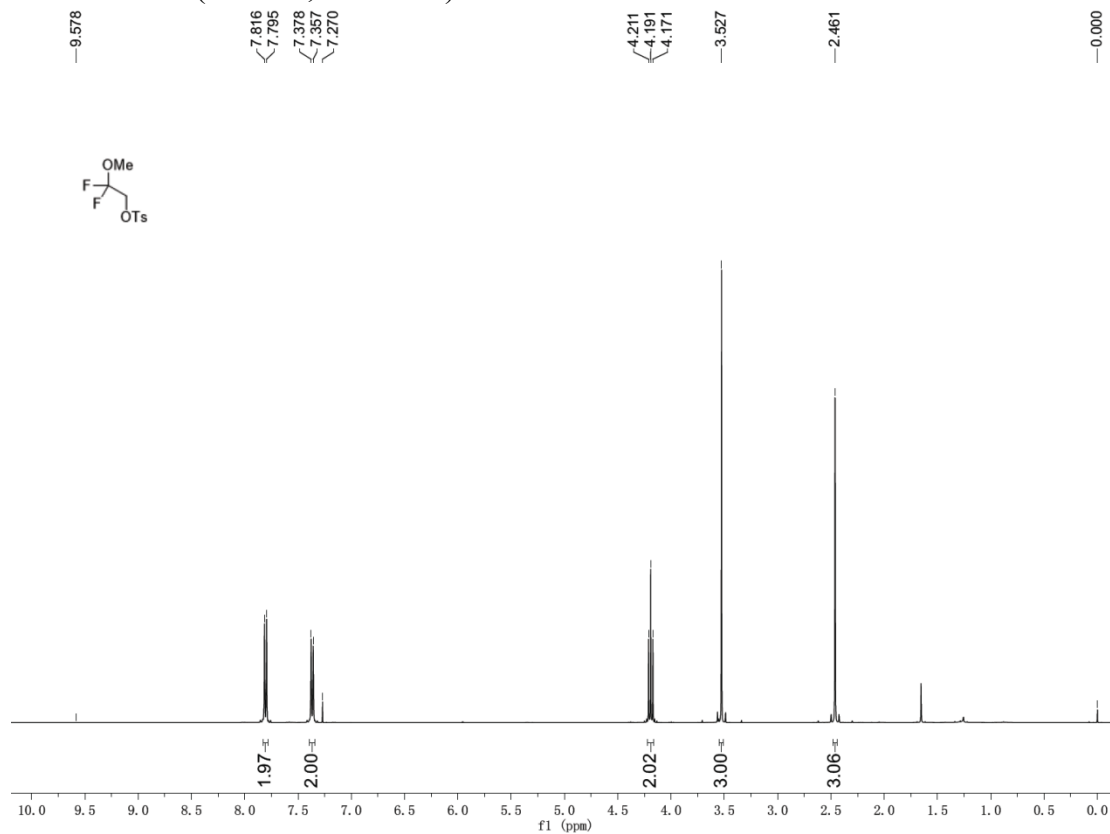

$^{13}\text{C}\{^1\text{H}\}$ -NMR of **8** ( $\text{CDCl}_3$ , 100 MHz)

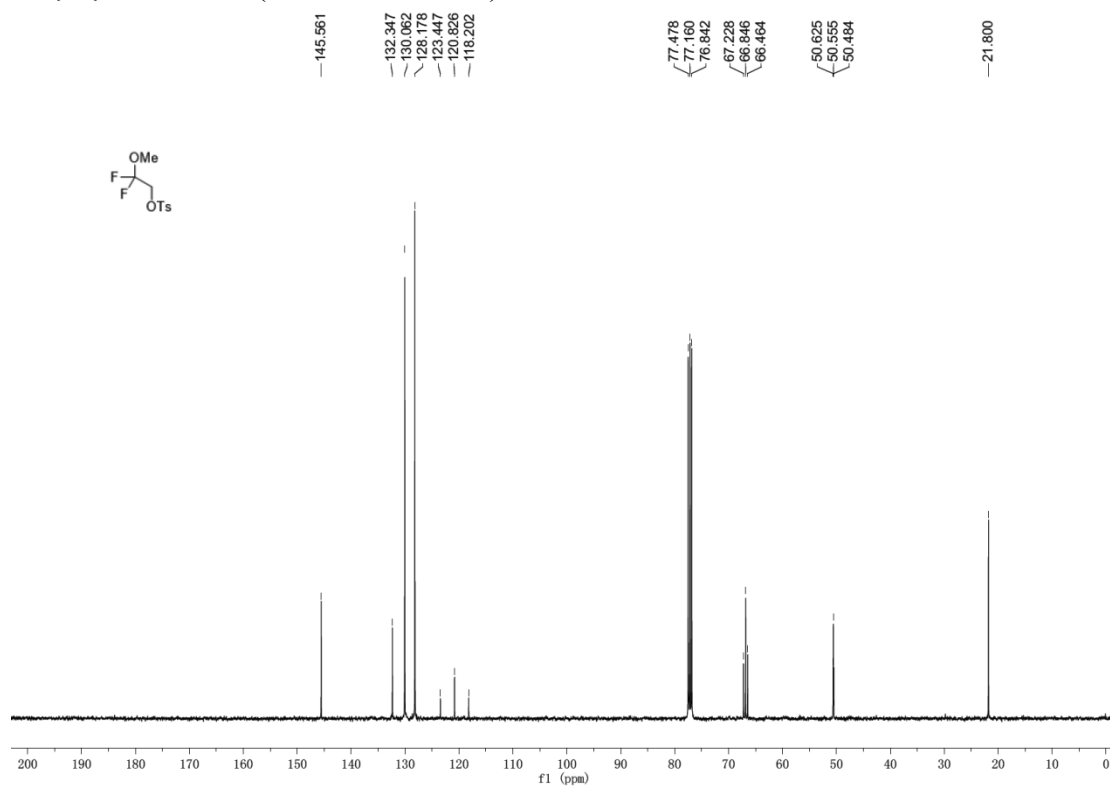

$^{19}\text{F}$ -NMR of **8** ( $\text{CDCl}_3$ , 376 MHz)

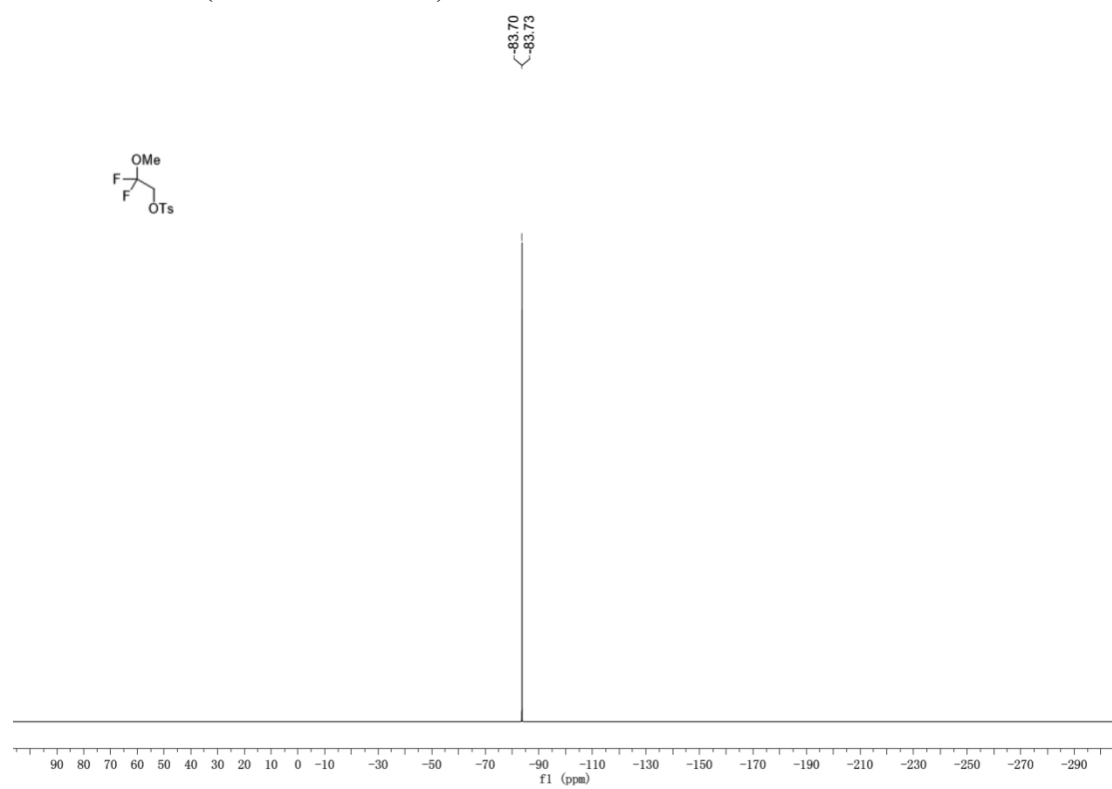

$^1\text{H-NMR}$  of rhodacycle **A'** ( $\text{DMSO-}d_6$ , 400 MHz)

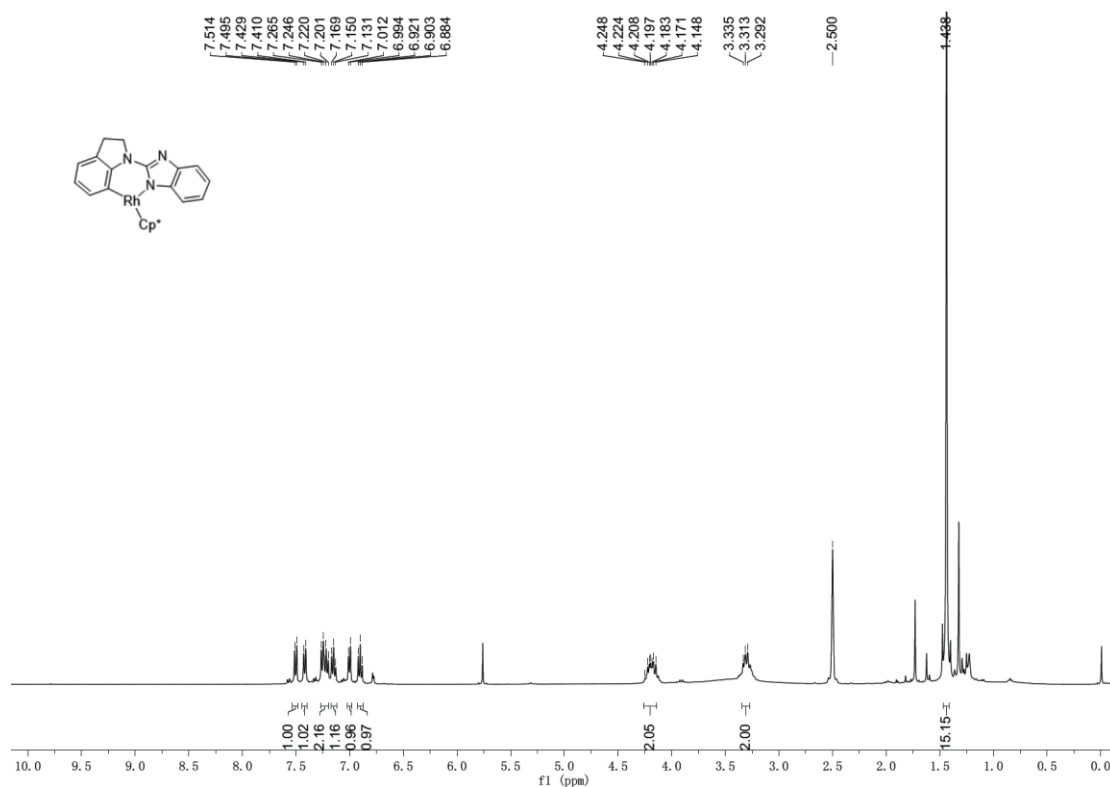

$^{13}\text{C}\{^1\text{H}\}$ -NMR of rhodacycle **A'** ( $\text{DMSO-}d_6$ , 100 MHz)

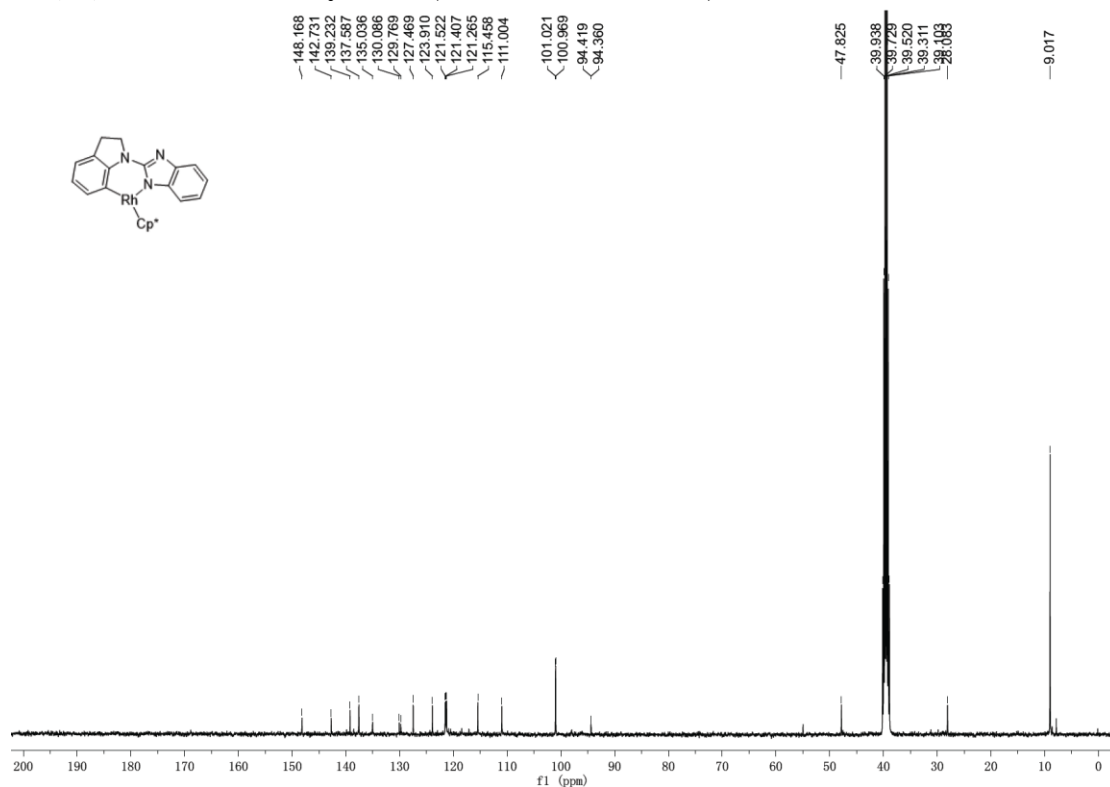

Supplement: d3nj01544k1.pdf [file d3nj01544k1.pdf]
